# Supplementary material for: Efficacy and safety of bevacizumab in the treatment of adult gliomas: a systematic review and meta-analysis
Source: PubMed Central journal article supplement — BMJ Open. 2021 Dec 2;11(12):e048975. doi: 10.1136/bmjopen-2021-048975 (PMC8640637; doi:10.1136/bmjopen-2021-048975), 2021-12-02
Supplement: bmjopen-2021-048975.draft_revisions.pdf [file bmjopen-2021-048975.draft_revisions.pdf]

# BMJ Open

BMJ Open is committed to open peer review. As part of this commitment we make the peer review history of every article we publish publicly available.

When an article is published we post the peer reviewers' comments and the authors' responses online. We also post the versions of the paper that were used during peer review. These are the versions that the peer review comments apply to.

The versions of the paper that follow are the versions that were submitted during the peer review process. They are not the versions of record or the final published versions. They should not be cited or distributed as the published version of this manuscript.

BMJ Open is an open access journal and the full, final, typeset and author-corrected version of record of the manuscript is available on our site with no access controls, subscription charges or pay-per-view fees (<http://bmjopen.bmj.com>).

If you have any questions on BMJ Open's open peer review process please email [info.bmjopen@bmj.com](mailto:info.bmjopen@bmj.com)

# BMJ Open

## Bevacizumab may prolong progression-free survival of gliomas: a systematic review and meta-analysis

|                               |                                                                                                                                                                                                                                                                                                                                                                                           |
|-------------------------------|-------------------------------------------------------------------------------------------------------------------------------------------------------------------------------------------------------------------------------------------------------------------------------------------------------------------------------------------------------------------------------------------|
| Journal:                      | <i>BMJ Open</i>                                                                                                                                                                                                                                                                                                                                                                           |
| Manuscript ID                 | bmjopen-2021-048975                                                                                                                                                                                                                                                                                                                                                                       |
| Article Type:                 | Original research                                                                                                                                                                                                                                                                                                                                                                         |
| Date Submitted by the Author: | 13-Jan-2021                                                                                                                                                                                                                                                                                                                                                                               |
| Complete List of Authors:     | Wang, huan; Shaanxi University of Chinese Medicine<br>Xiao-xuan, Fan; Shaanxi University of Chinese Medicine, Affiliated Hospital<br>Xiao-ping , Zhao; Shaanxi University of Chinese Medicine, Affiliated Hospital<br>Wang, kai; Shaanxi University of Chinese Medicine<br>Si-tian, Ma; Shaanxi University of Chinese Medicine<br>Yong-feng, Yang; Shaanxi University of Chinese Medicine |
| Keywords:                     | NEUROSURGERY, ONCOLOGY, Head & neck tumours < ONCOLOGY                                                                                                                                                                                                                                                                                                                                    |
|                               |                                                                                                                                                                                                                                                                                                                                                                                           |

SCHOLARONE™  
Manuscripts

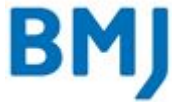

I, the Submitting Author has the right to grant and does grant on behalf of all authors of the Work (as defined in the below author licence), an exclusive licence and/or a non-exclusive licence for contributions from authors who are: i) UK Crown employees; ii) where BMJ has agreed a CC-BY licence shall apply, and/or iii) in accordance with the terms applicable for US Federal Government officers or employees acting as part of their official duties; on a worldwide, perpetual, irrevocable, royalty-free basis to BMJ Publishing Group Ltd ("BMJ") its licensees and where the relevant Journal is co-owned by BMJ to the co-owners of the Journal, to publish the Work in this journal and any other BMJ products and to exploit all rights, as set out in our [licence](#).

The Submitting Author accepts and understands that any supply made under these terms is made by BMJ to the Submitting Author unless you are acting as an employee on behalf of your employer or a postgraduate student of an affiliated institution which is paying any applicable article publishing charge ("APC") for Open Access articles. Where the Submitting Author wishes to make the Work available on an Open Access basis (and intends to pay the relevant APC), the terms of reuse of such Open Access shall be governed by a Creative Commons licence – details of these licences and which [Creative Commons](#) licence will apply to this Work are set out in our licence referred to above.

Other than as permitted in any relevant BMJ Author's Self Archiving Policies, I confirm this Work has not been accepted for publication elsewhere, is not being considered for publication elsewhere and does not duplicate material already published. I confirm all authors consent to publication of this Work and authorise the granting of this licence.

# Bevacizumab may prolong progression-free survival of gliomas: a systematic review and meta-analysis

## Corresponding author:

*Name:* Wang Huan      *Mailing Address:* Affiliated Hospital of Shaanxi University of Traditional Chinese Medicine, West Weiyang Road, Xianyang City, Shaanxi Province, China      *E-mail:* :wh2896526547@163.com      *Telephone* No.15709280596

## Other authors:

Fan Xiao-xuan      Brain Surgery, Affiliated Hospital of Shaanxi University of Traditional Chinese Medicine, Shaanxi, China

Zhao Xiao-ping      Brain Surgery, Affiliated Hospital of Shaanxi University of Traditional Chinese Medicine, Shaanxi, China

Wang Kai      The first Clinical Medical College of Shaanxi University of Traditional Chinese Medicine, Shaanxi, China

Ma Si-tian      The first Clinical Medical College of Shaanxi University of Traditional Chinese Medicine, Shaanxi, China

Yang Yong-feng      The first Clinical Medical College of Shaanxi University of Traditional Chinese Medicine, Shaanxi, China

**Keywords:** glioma, progression-free survival, Bevacizumab

**Number of words:** 2699

## ABSTRACT

**Objective:** This study evaluated the efficacy and safety of bevacizumab in patients with glioma.

**Design:** Systematic review and meta-analysis.

**Data sources:** The data were collected using online search criteria from the databases like PubMed, Embase, The Cochrane Library, OVID, CNKI, and CBM database from inception up to April 2020.

**Intervention:** Bevacizumab (BEV) and other interventions.

**Primary and secondary outcome measures:** The main indicators included progression-free survival rate and overall survival rate, and the secondary indicators were adverse reactions.

1  
2  
3  
4 **Results:** A total of 10 clinical center trials were included in this study for meta-analysis,  
5 including 2392 patients . The results of the meta-analysis showed that the median  
6 progression-free survival rate of the BEV group (PFS) was significantly higher than that  
7 of the Non-BEV group ( $P < 0.00001$ ). When compared with the PFS rate of each stage,  
8 the PFS rate of the BEV group was 6 months (3.31, 95%CI 2.74 to 4.00,  $p < 0.00001$ ), 12  
9 months (2.05, 95%CI 1.70 to 2.49,  $p < 0.00001$ ) and 18 months (1.31, 95%CI 1.02 to 1.69,  
10  $p = 0.03$ ). The PFS of the BEV group was higher than that of Non-BEV group at 24  
11 months (0.83, 95%CI 0.50 to 1.37,  $p = 0.47$ ). At 30 months (0.62, 95%CI 0.39 to 0.97,  
12  $p = 0.04$ ), the PFS of the Non-BEV group was lower than that of the Non-BEV  
13 group. Moreover, we have compared overall survival rate and the five common adverse  
14 reactions, including hypertension ,hemorrhage , and cerebral hemorrhage , Proteinuria  
15 and thromboembolism .

16  
17 **Conclusion:** BEV can significantly prolong the PFS of patients with glioma within 18  
18 months and shorten the PFS of patients after 30 months. This limitation may be related  
19 to the high incidence of adverse events caused by long-term use of BEV. More  
20 prospective studies are needed to verify it in the future.  
21

#### 22 **Strengths and Limitations of this study**

- 23 1. We used the Cochrane criteria to assess the risk of bias.
- 24 2. The heterogeneity was explored by sensitivity, sub-group.
- 25 3. the quality of included studies was largely moderate to high.
- 26 4. The preoperative symptoms and the scope and degree of surgical resection are not  
27 taken into account.

#### 28 **INTRODUCTION**

29  
30 Brain glioma (High-Grade Glioma, HGG) is the most common primary intracranial  
31 tumor, accounting for about 27% of central nervous system tumors and 80% of  
32 intracranial malignant tumors<sup>1</sup>. The median survival time reported with brain glioma is  
33 14-16 months<sup>2</sup>. The Surgical intervention combined with radiotherapy and  
34 chemotherapy are often followed for treatment of such cases, but because of its high  
35 invasive nature, it often relapses in a short time with poor prognosis. The emergence of  
36 temozolomide has considerably delayed the development of glioma to some extent, but  
37 the survival rate and quality of life of patients are still very low. Therefore, looking for  
38 better drugs to prevent and delay the postoperative recurrence of glioma has become  
39 the focus of current research. In recent years, more and more studies have shown that  
40 malignant glioma is the tumor with the highest degree of vascularization<sup>3</sup>. The nature of  
41 proliferation is characterized by obvious proliferative vascular lumen and with abnormal  
42  
43  
44  
45  
46  
47  
48  
49  
50  
51  
52  
53  
54  
55  
56  
57  
58  
59  
60

1  
2  
3  
4 proliferation of neovascularization which participates in the construction of tumor  
5 microenvironment<sup>4</sup>. It is closely related to the growth, invasion, and metastasis of the  
6 tumor, and positively correlated with the extent of malignancy and prognosis of the  
7 tumor. Recently, the unique biological characteristics of gliomas indicated that  
8 angiogenic factors may play an important role in its treatment and have become the  
9 focus of research.  
10  
11

12  
13 Humanized anti-vascular endothelial growth factor monoclonal  
14 antibody-bevacizumab<sup>5</sup>, as a representative drug of anti-angiogenic therapy, was  
15 approved for recurrent glioblastoma by FDA in 2009<sup>6</sup> and is listed in China in 2010 by  
16 CFDA. According to the radiological response rate, bevacizumab has been approved  
17 for recurrent glioblastoma in the United States and many other countries<sup>7,8</sup>. Although  
18 bevacizumab (BEV) has become an important part of HGG therapy, the safety and  
19 long-term efficacy of BEV are not clear. Therefore, we conducted a clinical  
20 meta-analysis to evaluate the safety and adverse reactions of BEV in patients with  
21 HGG, in order to provide a reference for clinical application.  
22  
23  
24  
25  
26  
27

## 28 **METHODS**

29  
30 This study was mainly based on the literature research, and hence there was a  
31 requirement for ethical identification.  
32  
33

### 34 **Search strategy**

35  
36 We collected all the clinical experimental studies of anti-angiogenic therapy in the  
37 treatment of gliomas, retrieved through a database search including PubMed,  
38 Embase, The Cochrane Library, OVID , CNKI, and CBM , from the establishment of the  
39 database to April 2020. The search strategy followed included a combination of subject  
40 words and free words, and the retrieval strategy was determined after several  
41 pre-searches. The main search words included: "glioma", "angiogenesis inhibitors",  
42 "vascular endothelial growth factors", "VEGF", and "clinical study". Additionally, we  
43 also manually searched the reference list of all articles on this topic to check and  
44 enhance the retrieval of other related publications. All search results are evaluated  
45 according to the (PRISMA) statement of "preferred reporting items for systematic  
46 review and meta-analysis".  
47  
48  
49  
50  
51  
52  
53

### 54 **Selection criteria**

55  
56 Studies were included if they fulfilled the following criteria: (1) Study subjects: the  
57 participants were patients of any age, whose histology was confirmed to be HGG. They  
58 may have undergone any form of surgery to achieve histological diagnosis (biopsy or  
59  
60

1  
2  
3  
4 resection); (2) Study type: The clinical control study; (3) Intervention: BEV in  
5 bevacizumab group must include bevacizumab, which can be used alone or in  
6 combination with multiple drugs. The control group (Non-BEV) refers to treatment that  
7 does not include anti-angiogenesis, which can be placebo or supportive therapy, or  
8 active intervention (such as chemotherapy). (4) Outcome indicators: included in  
9 accordance with the following arbitrary outcome indicators: ① main indicators:  
10 progression-free survival (PFS)rate, defined as the time from randomization to death or  
11 disease progression of any cause, and overall survival(OS) rate, defined as the time  
12 from randomization to death. ② key indicators: adverse events classified according to  
13 the World Health Organization (WHO) or the General terminology Standard of the  
14 National Cancer Institute (NCI-CTCAE (CTCAE2017)), including the percentage of  
15 treatment-related deaths.

16  
17  
18  
19  
20  
21  
22  
23  
24 Studies were excluded if they fulfilled the following conditions: Non-clinical control  
25 studies, incomplete abstract information, conference papers, reviews, and case reports.  
26 In addition, the literature of repeated publication and incomplete data that cannot  
27 extract valid data should also be excluded.  
28  
29

### 30 31 32 **Data extraction**

33  
34 Literature screening, data extraction, and cross-checking were carried out by two  
35 independent researchers according to the initial inclusion and exclusion criteria, and if  
36 there were any differences, it was discussed or judged with the assistance of a third  
37 person, and contact and supplement the missing data with the author as far as possible.  
38 During the literature screening, the title and the abstract were read initially, and after  
39 excluding the obviously irrelevant literature, the full text was read to determine whether  
40 to include it or not. Upon matching the inclusion criteria of requirements, the following  
41 contents were extracted: (1) the basic information, including title, author, published  
42 country, publication date, research type; (2) study subjects, including the number of  
43 cases in each group, average age; (3) interventional factors, including the specific  
44 details of exposure factors, follow-up time, etc.; (4) the outcome indicators.  
45  
46  
47  
48  
49  
50

### 51 52 **Quality assessment**

53  
54 Using the Cochrane collaboration tool, the risk of bias in individual studies was  
55 assessed from seven aspects (sequence generation, allocation hiding, uninformed  
56 participants and people, incomplete outcome data, selective reports, and other biases  
57 and risks)<sup>9</sup>. Finally, each project was evaluated at three levels: low risk, unclear, and  
58 high risk. The two authors conducted independent quality assessments and any  
59  
60

differences among them were resolved through discussions with a third research expert.

### Statistical analysis

#### Analysis of outcome index

PFS, OS, and adverse reactions were analyzed by Meta with RevMan5.1 software. The data were counted by risk ratio (hazard ratio; HR) and odds ratio (Odds ratio; OR). The interval estimation was expressed by 95%CI, and the test level of the effect quantity was  $\alpha = 0.05$ .

#### Heterogeneity analysis

The heterogeneity among the included results was analyzed by using the "I<sup>2</sup>" (the level is  $\alpha = 0.1a$ ). Simultaneously, combined with I<sup>2</sup> to quantitatively judge the size of heterogeneity, stata15.1 was used for sensitivity analysis, and the method of examining the influence of a single study was used to eliminate them one by one. The consistency of the results obtained after the above transformation shows that the results of Meta-analysis were stable, otherwise, they were regarded as unstable. Publication bias was detected by the funnel chart method.

## RESULT

### Literature screening

A total of 1108 related literature were obtained in the initial examination. After screening the literature one by one, a total of 1123 patients were included in 10 clinical studies<sup>10-19</sup>. The database and the number of documents retrieved are as follows: PubMed (nasty 259), The Cochrane Library (nasty 153), EMBase (nasty 155), CNKI (nasty 118), CBM (nasty 358), WangFang (nasty 65). The flow chart and the results of literature retrieval are shown in figure 1.

### The basic characteristics of the inclusion study

For the inclusion study, the basic information for inclusion is completed using pre-developed forms (Tables 1, 2).

Table 1: basic information for inclusion in the study

| Study | State | Res  | Cases     | Ages(exper | Follow-up | Outcom |
|-------|-------|------|-----------|------------|-----------|--------|
|       |       | earc | (experime | imental /  | time      |        |
|       |       | h    | ntal/     | control )  |           |        |
|       |       | type | control ) |            |           |        |



|                                              |          |         |          |                   |                                                  |                                                                 |
|----------------------------------------------|----------|---------|----------|-------------------|--------------------------------------------------|-----------------------------------------------------------------|
| Olivier L. Chinot, M.D. <sup>2014</sup> [10] | France   | RCT     | 458/463  | 20–84/18–79       | The last patient was hospitalized for 17 months. | 1and2year survival rates 、 safety and quality of life、 PFS 、 OS |
| Qianru Zhao <sup>2016</sup> [11]             | China    | RCT     | 25/24    | 24–71/27–         | The median follow-up time was 7.9 months         | disease control rate 、 median survival time、 OS 、 PFS           |
| Ulrich Herrlinge r <sup>2016</sup> [12]      | German y | RCT     | 116/54   | 25–78/26–78       | Long-term follow-up until death                  | PFS–6、 PFS、 OS                                                  |
| Mark R.Gilbert <sup>2016</sup> [13]          | German y | RCT     | 320/317  | >18               | 6 cycles                                         | OS、 PFS                                                         |
| Clara Chen <sup>2014</sup> [14]              | Americ a | Non-RCT | 57/79/23 | 30–77/24–82/19–78 | >1year                                           | OS、 PFS                                                         |
| Hualong Li <sup>2020</sup> [15]              | China    | RCT     | 31/31    | 18–70/19–69       | 4 months                                         | PFS6、 DCR、 Adverse reaction                                     |
| Zhixian Zhang <sup>2018</sup> [16]           | China    | RCT     | 20/20    | 24–74             | 5. 2–18mon ths                                   | PFS6、 OS12                                                      |

|                                    |             |     |        |                           |                    |                                |
|------------------------------------|-------------|-----|--------|---------------------------|--------------------|--------------------------------|
| Jiaqi Wang <sup>2013</sup><br>[17] | China       | RCT | 27/27  | 53.6 ± 9.7<br>/54.7 ± 8.8 | 6months-2y<br>ears | RR , DCR , Adverse<br>reaction |
| Albert Lai <sup>2010</sup> [18]    | Americ<br>a | RCT | 70/110 | 31.3-75.8/<br>20.5-90     | >42months          | OS , PFS , Adverse<br>reaction |
| B.Chauffert <sup>2014</sup> [19]   | Britain     | RCT | 60/60  | 43-69/43-7<br>1           | 6<br>months        | OS , PFS , Adverse<br>reaction |

Table 2: basic characteristics of the inclusion study

| Study                                        | Male                      | Female                    | Open<br>biopsy         | Partial resectio          | Complete<br>resection       | experimental/<br>control                         |
|----------------------------------------------|---------------------------|---------------------------|------------------------|---------------------------|-----------------------------|--------------------------------------------------|
| Olivier L.<br>Chinot,<br>M.D <sup>2014</sup> | 282 (61.6)<br>/298 (64.4) | 176 (38.4)<br>/165 (35.6) | 60 (13.1)<br>/44 (9.5) | 210 (45.9)<br>/223 (48.2) | 188 (41.0)<br>/196 (42.3)   | Bevacizumab+<br>RT - TMZ/<br>Placebo+RT -<br>TMZ |
| Qianru Zhao <sup>2016</sup>                  | 14/12                     | 11/12                     | /                      | 15/16                     | 10/8                        | BEV+TMZ/TMZ                                      |
| Ulrich Herrlinge<br>r <sup>2016</sup>        | 80 (69.0)<br>/34 (63.0)   | 36 (31.0)<br>/20 (37.0)   | 0/2 (3.7)              | 58 (50.0) /2<br>7 (50.0)  | 58<br>( 50.0) /25<br>(46.3) | BEV+IRI/TMZ                                      |
| Mark R.Gilbert<br>2016                       | /                         | /                         | /                      | /                         | /                           | Bevacizumab/<br>Placebo                          |

|                             |               |               |            |               |                 |                 |
|-----------------------------|---------------|---------------|------------|---------------|-----------------|-----------------|
| Clara                       | 30 (53) /45 ( | 57/79/23      | 34 (60) /4 | 20 (35) /33 ( | 3 (5) /2 (2)) / | Bevacizumab     |
| Chen                        | 57) /15 (65)  | 27 (47) /34 ( | 4 (56) /14 | 42) /9 (39)   | 0 (0)           | monotherapy     |
| 2014                        |               | 43) /8 (35)   | (61)       |               |                 | /Bvacizumab     |
|                             |               |               |            |               |                 | combination     |
|                             |               |               |            |               |                 | /Nonbevacizumab |
| Hualong                     | 19/18         | 12/13         | /          | /             | /               | TMZ+BEV/TMZ     |
| Li <sup>2020</sup>          |               |               |            |               |                 |                 |
| Zhixian                     | 22            | 18            | /          | 18            | 22              | BEV+TMZ/        |
| Zhang                       |               |               |            |               |                 | Gamma knife     |
| 2018                        |               |               |            |               |                 | +TMZ/           |
| Jiaqi                       | 16/14         | 11/13         | /          | /             | /               | TMZ+BEV/TMZ     |
| Wang <sup>2013</sup>        |               |               |            |               |                 |                 |
| Albert                      | 31/40         | 39/70         | 2/23       | 40/40         | 28/47           | RT+TMZ+BV/UC    |
| Lai <sup>2010</sup>         |               |               |            |               |                 | LA/KPLA         |
|                             |               |               |            |               |                 | Control         |
|                             |               |               |            |               |                 | RT/TMZ          |
| B.Chauffert <sup>2014</sup> | 26/23         | 34/37         | /          | /             | /               | BEV+IRI/TMZ     |
|                             |               |               |            |               |                 | Z+RT            |

#### Offset risk included in the study

The results of the bias risk assessment included in the study are shown in figure 2.

#### Meta-analysis results

Progression-free survival

1  
2  
3  
4 Six studies<sup>10,12-14,18-19</sup> reported median progression-free survival (BEV group,  
5 n=1160) and Non-BEV group (n=1027). Results: HR=0.71, 95%CI, 0.65 to 0.79;  
6 suggested that the median progression-free survival of gliomas treated with BEV was  
7 significantly longer than that of malignant gliomas treated with Non-BEV (P<0.00001),  
8 as shown A in figure 3 .  
9

10  
11 Ten studies<sup>10-19</sup> compared PFS ratios at different follow-up between the Bev group  
12 and the Non-BEV group. There was a significant difference in the total heterogeneity  
13 test ( $I^2=71%$ ,  $P<0.00001$ ), so the random effect model was used. The results showed  
14 that the combined OR values of 6 months, 12 months, 18 months, 24 months and 30  
15 months are (3.31, 95%CI 2.74 to 4.00,  $p<0.00001$ ), (2.05, 95%CI 1.70 to 2.49,  
16  $p<0.00001$ ), (1.31, 95%CI 1.02 to 1.69,  $p=0.03$ ), (0.83, 95%CI 0.50 to 1.37,  $p=0.47$ ),  
17 (0.62, 95%CI 0.39 to 0.97,  $p=0.04$ ), as shown C in figure 3 .  
18  
19  
20  
21

#### 22 Overall survival time

23 Six studies<sup>10,12-14,18-19</sup> reported the median overall survival time, and there was no  
24 significant difference in the heterogeneity test ( $I^2=72%$ ,  $p=0.54$ ), so the random effect  
25 model was used for data analysis. Results: HR=0.93, 95%CI, 0.75 to 1.16, suggesting  
26 that there was no significant difference in median overall survival time between the  
27 BEV group and Non-BEV group ( $P=0.54$ ), as shown B in figure 3 .  
28  
29

30 Six studies<sup>10,12-14,18-19</sup> compared OS ratios at different follow-up between the Bev  
31 group and the Non-BEV group. There was a significant difference in the total  
32 heterogeneity test ( $I^2=38%$ ,  $P<0.03$ ). The Random effect model was used, and the  
33 results show that the combined OR values of 6 months, 12 months, 18 months, 24  
34 months, and 36 months are (4.94, 95%CI 3.60-6.78,  $P<0.00001$ ), (2.62, 95%CI  
35 1.96-3.49,  $P<0.00001$ ), (2.06, 95%CI 0.96-4.40,  $P=0.05$ ), (4.02, 95%CI 2.19-7.36,  
36  $P<0.00001$ ), (1.73, 95%CI 0.93-3.23,  $P=0.09$ ), as shown D in figure 3 .  
37  
38  
39  
40  
41

#### 42 Adverse reaction

43 As shown in figure 4, there were six studies<sup>10-11,13-15</sup> that compared adverse  
44 reactions between the BEV group and the Non-BEV group. There was a significant  
45 difference in the total heterogeneity test ( $I^2=58%$ ,  $P<0.00001$ ), and the random effect  
46 model was used. The results showed the combined OR values of hypertension,  
47 hemorrhage, cerebral hemorrhage, albuminuria, and thromboembolism as follows:  
48 hypertension (4.94, 95%CI 3.60 to 6.78,  $P<0.00001$ ), hemorrhage (2.62, 95%CI 1.96 to  
49 3.49,  $P<0.00001$ ), cerebral hemorrhage (2.06, 95%CI 0.96 to 4.40,  $P=0.05$ ), proteinuria  
50 (4.02, 95%CI 2.19 to 7.36,  $P<0.00001$ ) and thromboembolism (1.73, 95%CI 0.93 to  
51 3.23,  $P=0.09$ ).  
52  
53  
54  
55  
56  
57

#### 58 Sensitivity analysis

1  
2  
3  
4 The sensitivity test was used to evaluate the stability of OS, PFS, and adverse  
5 reactions in the included literature, which showed that all values remained in the  
6 confidence interval on both sides after one by one elimination. Hence, it can be  
7 concluded that all the included literature is stable, as shown in figures 5 .  
8  
9

#### 10 11 Publication bias

12  
13 As shown in figures 6, except for the adverse reactions and the funnel chart of the  
14 median OS with HR, the publication bias of the funnel chart was higher, while the rest  
15 of the funnel chart was mainly concentrated at the top. Moreover, the symmetry was  
16 also proper, so it was concluded that the possibility of publication bias was small.  
17  
18  
19

## 20 21 DISCUSSION

22 According to the histopathological and clinical features, gliomas are divided into  
23 astrocytoma, oligodendroglioma, and ependymoma, which are the most common  
24 malignant tumors derived from neuroepithelium<sup>20</sup>. Although the technical level of  
25 surgical intervention, radiotherapy, and chemotherapy<sup>21</sup> in the treatment of glioma has  
26 been greatly improved, there is still a high recurrence rate with increased mortality,  
27 which necessitates a more effective therapy. Glioma affects the body through a variety  
28 of pathophysiological processes, in which angiogenesis plays an important role in the  
29 occurrence and development of glioma, hence blocking angiogenesis has become a  
30 new direction of treatment. Bevacizumab is an anti-VEGF antibody against vascular  
31 endothelial growth factor<sup>22</sup>, which acts mainly by competing against the binding of  
32 VEGF, to VEGFR on the membrane of target cells. Studies reported by Pope et al.<sup>23</sup>  
33 and others have shown that the high levels of VEGF affect blood vessel density and  
34 tumor grade. Some studies have shown that Ang2/Tie2<sup>24,25</sup> and STAT3<sup>26</sup> are two  
35 important signal pathways in anti-angiogenic therapy, which play a vital role in  
36 inhibiting peritumoral edema and thus increase of neurological symptoms. In order to  
37 better understand the advantages and disadvantages of BEV on glioma, we performed  
38 this meta-analysis study which can enlighten and provide a better understanding of the  
39 efficacy and safety of BEV through a systematic review.  
40  
41  
42  
43  
44  
45  
46  
47  
48  
49

50 The results of our study showed that the PFS of the BEV group was higher than  
51 that of the Non-BEV group during the follow-up period of < 18 months, but the PFS of  
52 the BEV group was lower than that of the Non-BEV. Moreover, among the BEV group  
53 when the follow-up time was 30 months, the OS was higher at 6 months and 12 months,  
54 but there was no significant difference between the BEV group and Non-BEV group  
55 after 12 months. The study of Li YD<sup>27</sup> showed that the progression-free survival time at  
56 24 months and 36 months in the bevacizumab group was lower than that in the the  
57  
58  
59  
60

1  
2  
3  
4 non-bevacizumab group. However, the study result from Liao KL<sup>28</sup> showed that the  
5 incidence of PFS was higher in newly diagnosed HGG plus BEV, and the combination  
6 therapy involving BEV did not improve the OS. The AVAglio<sup>29</sup> trial showed that patients  
7 treated with bevacizumab had significant advantages in terms of PFS (6.2months vs  
8 10.6 months) and quality of life maintenance, but did not show an advantage in terms  
9 of OS (16.8months vs 16.7 months). Compared with the patients without bevacizumab,  
10 2.2% of patients treated with bevacizumab confirmed pseudo-progression. Meanwhile,  
11 9.3% of patients treated with non-bevacizumab<sup>30</sup> reported that the median PFS of  
12 bevacizumab combined with temozolomide and radiotherapy was nearly twice as high  
13 as that of 3-14 months in a single phase 2 clinical trial, but there was no significant  
14 improvement in overall survival. Chinot *et al.*<sup>31</sup> and Gilbert *et al.*<sup>32</sup> conducted phase 3  
15 clinical trials in the placebo control group, respectively. The results showed that the  
16 PFS of the experimental group increased by 40%, 71%, compared with the control  
17 group. Brandes<sup>33</sup> *et al.* and Wick<sup>34</sup> also concluded that BEV failed to improve the OS of  
18 glioma patients in a randomized study of bevacizumab. BEV can increase the  
19 progression-free survival time of patients but cannot significantly improve OS.  
20  
21  
22  
23  
24  
25  
26  
27

28 Studies have shown that long-term use of BEV does not increase patients' PFS, on  
29 the contrary, it may decrease PFS over time, due to the adverse reactions caused by  
30 BEV. This study showed five common adverse reactions including hypertension,  
31 hemorrhage, cerebral hemorrhage, albuminuria, and thromboembolism upon initiating  
32 BEV therapy, but the toxicity of antiangiogenic therapy was generally well tolerated. A  
33 phase II trial of Japanese study<sup>35</sup> showed that the most common side effects were  
34 albuminuria, hypertension, hemorrhage, fever, and epilepsy. Studies<sup>36</sup> showed that the  
35 incidence of adverse reactions above grade 3 was 27.1% to 46.4%. The most common  
36 events reported were thromboembolism, hypertension, epilepsy, fatigue, and intestinal  
37 perforation. Zhang Li<sup>37</sup> evaluated cases from 20 articles about adverse reactions  
38 caused by BEV in 357 patients and found that the main adverse reactions were  
39 associated with cardiovascular and hematological diseases. Norden<sup>38</sup> evaluated 64  
40 glioma patients treated with anticoagulants with BEV and those without anticoagulants.  
41 The results showed that the rates of intracranial hemorrhage and other bleeding sites  
42 in patients treated with anticoagulants were significantly higher than those in patients  
43 treated with BEV alone. However, the rate of severe intracranial hemorrhage was  
44 within an acceptable range, hence the anticoagulants were recommended for patients  
45 with symptomatic venous thrombosis treated with BEV. Therefore, when bevacizumab  
46 was used in the clinic, it was necessary to closely observe for any adverse drug  
47 reactions, monitor blood pressure, blood coagulation function, and other indexes, and  
48 deal with the symptoms in time. We also need more large-scale phase III clinical  
49  
50  
51  
52  
53  
54  
55  
56  
57  
58  
59  
60

1  
2  
3  
4 studies to prove whether PFS can be improved by improving adverse reactions.  
5 Collectively, improving the PFS may enhance great economic and survival benefits to  
6 the patients and society, and may further reinforce the successful therapeutic  
7 applications of BEV in gliomas.  
8  
9

## 10 11 **CONCLUSIONS**

12  
13 The evidence suggests that BEV can significantly prolong the PFS of patients with  
14 glioma within 18 months and shorten the PFS of patients after 30 months. This  
15 limitation may be related to the higher incidence of adverse events caused by the  
16 long-term use of BEV.  
17  
18

## 19 20 **Limitations**

21  
22 In this study, the preoperative symptoms and the scope and degree of surgical  
23 resection are not taken into account. Hence, a large study in terms of more samples  
24 and higher quality clinical parameters may further validate the conclusive evidence.  
25  
26

## 27 28 **Declaration:**

29  
30 **Contributors** WH、FXXandZXP contributed to conception and design. WK、MST and  
31 YYF contributed to data acquisition or analysis and interpretation of data. WH、FXX、  
32 ZXP、WK、MSTandYYFwere involved in drafting the manuscript or revising it critically  
33 for important intellectual content. All authors have given final approval of the version to  
34 be published.  
35  
36

37  
38 **Funding** The authors have not declared a specific grant for this research from any  
39 funding agency in the public, commercial or not-for-profit sectors.  
40

41  
42 **Competing interests** None declared.

43  
44 **Patient consent for publication** Not required.

45  
46 **Provenance and peer review** Not commissioned; externally peer reviewed.

47  
48 **Data sharing:** No additional data are available.  
49

## 50 51 **Picture description**

52  
53 In this paper, the pictures are uploaded in a separate form, and the pictures are  
54 merged, leaving 6 important and indispensable pictures.  
55

## 56 57 **REFERENCES**

58  
59 [1] Brem S, Tsanaclis AM, Gately S, Gross JL, Herblin WF. Immunolocalization of basic fibroblast growth factor  
60 to the microvasculature of human brain tumors. *Cancer* 1992; 70: 2673-80.

- 1  
2  
3  
4 [2] Xia S, Lal B, Tung B, et al. Tumor microenvironment tenascin-C promotes glioblastoma invasion and  
5 negatively regulates tumor proliferation. *Neuro Oncol*,2015,18 (94):507 -517.  
6  
7 [3] Stupp R, Pavlidis N, Jelic S. ESMO Minimum Clinical Recommendations for diagnosis, treatment and  
8 follow-up of malignant glioma. *Ann Oncol*. 2005; 16 Suppl 1:i64-5.  
9  
10 [4] Higgins JPT, Altman DG, Gøtzsche PC, et al. The Cochrane Collaboration's tool for assessing risk of bias in  
11 randomised trials. *BMJ* 2011; 343:d5928.  
12  
13 [5] Sweet JA, Feinberg ML, Sherman JH. The role of avastin in the management of recurrent glioblastoma.  
14 *Neurosurg Clin N Am*, 2012;23(2):331-341.  
15  
16 [6] Cohen MH, Shen YL, Keegan P, et al. FDA drug approval summary: bevacizumab (Avastin) as  
17 treatment of recurrent glioblastoma multiforme. *Oncologist*, 2009;14(11):1131-1138.  
18  
19 [7] Kreisl TN, Kim L, Moore K, Duic P, Royce C, Stroud I, et al. Phase II trial of single-agent bevacizumab  
20 followed by bevacizumab plus irinotecan at tumor progression in recurrent glioblastoma. *J Clin Oncol* 2009;  
21 27:740–5.  
22  
23 [8] Friedman HS, Prados MD, Wen PY, Mikkelsen T, Schiff D, Abrey LE, et al. Bevacizumab alone and in  
24 combination with irinotecan in recur-rent glioblastoma. *J Clin Oncol* 2009; 27:4733–40.  
25  
26 [9] Gs HJP. Cochrane handbook for systematic reviews of interventions version 5.1.0 (updated March 2011).  
27 *Naunyn-Schmiedebergs Archiv für Experimentelle Pathologie und Pharmakologie* 2014;5:S38.  
28  
29 [10] Olivier L, Chinot, M.D., Wolfgang Wick, M.D., Warren Mason, M.D., et al. Bevacizumab plus  
30 Radiotherapy-Temozolomide for Newly Diagnosed Glioblastoma. *The New England Journal of Medicine*, 2014;  
31 370:709-722.  
32  
33 [11] Zhao Qianru. Efficacy and safety of bevacizumab combined with temozolomide in the treatment of recurrent  
34 malignant gliomas. Zhengzhou University, 2016.  
35  
36 [12] Ulrich Herrlinger, Niklas Schäfer, Joachim P, et al. Bevacizumab Plus Irinotecan Versus Temozolomide in  
37 Newly Diagnosed O6-Methylguanine-DNA Methyltransferase Nonmethylated Glioblastoma: The Randomized  
38 GLARIUS Trial. *Journal of clinical oncology*, 2015; 63:4691.  
39  
40 [13] Mark R. Gilbert, James J. Dignam, Terri S. Armstrong, A.N.P., Jeffrey S. Wefel. A Randomized Trial of  
41 Bevacizumab for Newly Diagnosed Glioblastoma. *The New England Journal of Medicine*, 2014;370:699-708.  
42  
43 [14] Clara Chen, Arliene Ravelo, Elaine Yu, et al. Clinical outcomes with bevacizumab-containing and  
44 non-bevacizumab-containing regimens in patients with recurrent glioblastoma from US community practices.  
45 *CLINICAL STUDY*, 2015;DOI 10.1007/s11060-015-1752-y.  
46  
47 [15] Li Hualong, Qiang Ming, Huang Xiaoqin, Cai Shuhua, Yang Qiwen. Efficacy of bevacizumab combined with  
48  
49  
50  
51  
52  
53  
54  
55  
56  
57  
58  
59  
60



1  
2  
3 temozolomide in the treatment of malignant recurrent gliomas. *Anhui Medicine*, 2020, 41 (01): 66-68.

4  
5  
6 [16] Zhang Zhixian, Gu Hou, Lin Jian, Cao Hongming, Lei Xuefen, Jiang Lifeng. Clinical efficacy of gamma  
7 knife combined with bevacizumab in the treatment of postoperative malignant gliomas. *Journal of Kunming*  
8 *Medical University*, 2018 *Journal* 39 (10): 33-century

9  
10  
11 [17] Wang Jiaqi, Liang Yong, Ouyang Zheng, Liu Chao, Ouyangsong, Tang Hongyu. Clinical analysis of  
12 bevacizumab combined with temozolomide in the treatment of glioblastoma. *Oncology Pharmacy*, 2013 pr. 3 (04):  
13 274-277.

14  
15  
16 [18] Albert Lai, Anh Tran, Phioanh L, et al. Phase II Study of Bevacizumab Plus Temozolomide During and After  
17 Radiation Therapy for Patients With Newly Diagnosed Glioblastoma Multiforme. *JOURNAL OF CLINICAL*  
18 *ONCOLOGY*,2010;30:2709.

19  
20  
21 [19] Chauffert B, Feuvret L, Bonnetain F, et al. Randomized phase II trial of irinotecan and bevacizumab as  
22 neo-adjuvant and adjuvant to temozolomide-based chemoradiation compared with temozolomide-chemoradiation  
23 for unresectable glioblastoma: final results of the TEMAVIR study from ANOCEF. *Annals of Oncology Official*  
24 *Journal of the European Society for Medical Oncology*, 2014, 25(7):1442.

25  
26  
27 [20] Zhao Ping, Chen Wanqing. *Incidence and death of Cancer in China 2003 May 2007*. Beijing: military  
28 *Medical Science Press*, 2012.

29  
30  
31 [21] Lu Yuntao, Qi Songtao, Ouyanghui, et al. Surgical and therapeutic strategies for recurrent malignant gliomas  
32 in refractory sites. *Chinese Journal of Modern Neurological Diseases*.2012 ;12 (6): 682-690.

33  
34  
35 [22] Cheng Haixia, Wang Yin. Hair cell astrocytoma with vascular central arrangement: case report and literature  
36 review. *Chinese Journal of Modern Neurology*.2 013; 13(4):342-348.

37  
38  
39 [23] Pope WB, Xia Q, Paton VE, et al. Patterns of progression in patients with recurrent glioblastoma treated  
40 with bevacizumab. *Neurology*,2011;76(5): 432-437.

41  
42  
43 [24] Park JS, Kim IK, Han S, et al. Normalization of tumor vessels by Tie2 activation and Ang2 inhibition  
44 enhances drug delivery and produces a favorable tumor microenvironment. *Cancer Cell*, 2016 ; 30(6) :  
45 953—967.

46  
47  
48 [25] Labussiare M, Cheneau C, Prahst C, et al. Angiopoietin-2 may be involved in the resistance to  
49 bevacizumab in recurrent glioblastoma. *Cancer Invest*, 2016; 34(1): 39—44.

50  
51  
52 [26] Groot J, Liang J, Kong LY, et al. Modulating antiangiogenic resistance by inhibiting the signal  
53 transducer and activator of transcription 3 pathway in glioblastoma. *Oncotarget*, 2012; 3(9): 1036-1048.

54  
55  
56 [27] Li Y, Hou M, Lu G, et al. The Prognosis of Anti-Angiogenesis Treatments Combined with Standard  
57 Therapy for Newly Diagnosed Glioblastoma: A Meta-Analysis of Randomized Controlled Trials. *Plos One*, 2016,  
58 11(12):e0168264.  
59  
60

- 1  
2  
3  
4 [28] Liao KL, Huang S, Wu YP. The prognosis for patients with newly diagnosed glioblastoma receiving  
5 bevacizumab combination therapy: a meta-analysis. *OncoTargets and therapy*. 2018; 11:3513-3520.  
6  
7 [29] Chinot O, Cloughesy T, Henriksson R, et al. Efficacy and safety of bevacizumab (Bv) plus standard  
8 combination temozolomide (T) and radiotherapy (RT) in newly diagnosed glioblastoma: final results from a AVA  
9 glioma. *Eur J Cancer* 2013; 49(suppl 2):S774-5.  
10  
11 [30] Vredenburgh JJ, Desjardins A, Kirkpatrick JP, et al. Addition of bevacizumab to standard radiation therapy  
12 and daily temozolomide is associated with minimal toxicity in newly diagnosed glioblastoma multiforme. *Int J*  
13 *Radiat Oncol Biol Phys*, 2012, 82(1):58-66.  
14  
15 [31] Chinot OL, Wick W, Mason W, et al. Bevacizumab plus radiotherapy-temozolomide for newly diagnosed  
16 glioblastoma. *N Engl J Med* 2014;370:709 - 22.  
17  
18 [32] Gilbert MR, Dignam JJ, Armstrong TS, et al. A randomized trial of bevacizumab for newly diagnosed  
19 glioblastoma. *N Engl J Med* 2014;370:699 - 708.  
20  
21 [33] Brandes, A.A., Finocchiaro, G., Zagonel, V., Reni, M., Fabi, A., Caserta, C., et al. Final results from the  
22 randomized phase II trial average (ML25739) with bevacizumab or fotemustine in recurrent GBM. *Neuro-Oncol*.  
23 2014;16: v8 - v22.  
24  
25 [34] Wick, W., Brandes, A.A., Gorlia, T., Bendszus, M., Sahm, F., Taal, W., et al., 2015. Phase III trial exploring  
26 the combination of bevacizumab and lomustine in patients with first recurrence of a glioblastoma: the EORTC  
27 26101 trial. *Neuro-Oncol*.2015;17:v1.  
28  
29 [35] Friedman HS, Prados MD, Wen PY, et al. Bevacizumab alone and in combination with irinotecan in recurrent  
30 glioblastoma. *J Clin Oncol*.2009;27:4733 - 40.  
31  
32 [36] Nagane M, Nishikawa R, Narita Y, et al. Phase II study of single-agent bevacizumab in Japanese patients with  
33 recurrent malignant glioma. *Jpn J Clin Oncol*.2012;42:887 - 95.  
34  
35 [37] Zhang Li. Statistical analysis of adverse reactions caused by bevacizumab. *Clinical Medical Engineering*.  
36 2012; 19 (1): 129-130.  
37  
38 [38] Norden AD , Bartolomeo J , Tanaka S , et al . Safety of concurrent bevacizumab therapy and  
39 anticoagulation in glioma patients. *J Neurooncol*.2011,106(1):121-125.  
40  
41  
42  
43  
44  
45  
46  
47  
48  
49  
50  
51  
52  
53  
54  
55  
56  
57  
58  
59  
60

1  
2  
3  
4  
5  
6  
7  
8  
9  
10  
11  
12  
13  
14  
15  
16  
17  
18  
19  
20  
21  
22  
23  
24  
25  
26  
27  
28  
29  
30  
31  
32  
33  
34  
35  
36  
37  
38  
39  
40  
41  
42  
43  
44  
45  
46  
47  
48  
49  
50  
51  
52  
53  
54  
55  
56  
57  
58  
59  
60

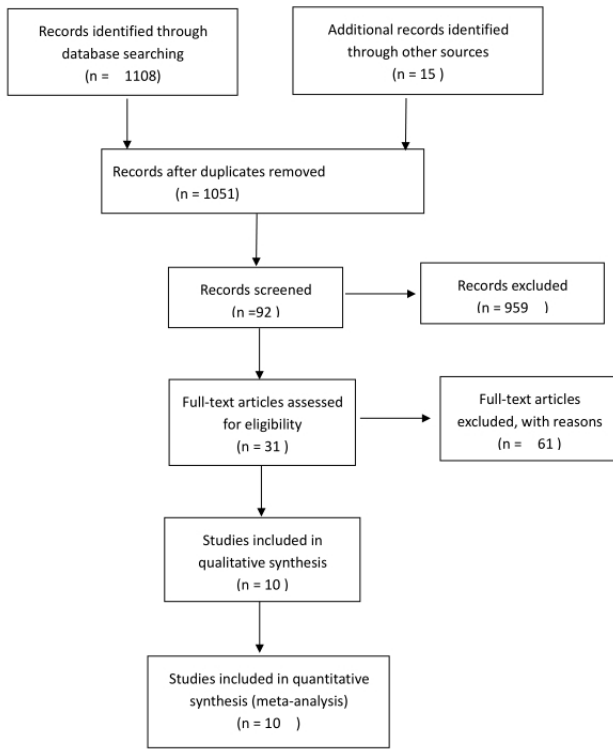

Figure 1: document screening process and results

168x237mm (120 x 120 DPI)

1  
2  
3  
4  
5  
6  
7  
8  
9  
10  
11  
12  
13  
14  
15  
16  
17  
18  
19  
20  
21  
22  
23  
24  
25  
26  
27  
28  
29  
30  
31  
32  
33  
34  
35  
36  
37  
38  
39  
40  
41  
42  
43  
44  
45  
46  
47  
48  
49  
50  
51  
52  
53  
54  
55  
56  
57  
58  
59  
60

|                        |   |   |   |   |   |   |   |   |   |
|------------------------|---|---|---|---|---|---|---|---|---|
| Albert Lai 2010        | ? | + | ? | + | + | + | + | + | + |
| B Chauffert 2014       | ? | ? | ? | + | + | + | + | + | + |
| Clara Chen 2014        | ? | ? | ? | ? | + | + | + | + | + |
| HuaLong Li 2013        | ? | ? | ? | + | + | + | + | + | + |
| Jiaqi Wang 2013        | ? | ? | ? | + | + | + | + | + | + |
| Mark R.Gilbert 2016    | ? | ? | ? | + | + | + | + | + | + |
| Oliver L. Chintot 2014 | ? | ? | ? | + | + | + | + | + | + |
| Qianru Zhao 2016       | ? | ? | ? | + | + | + | + | + | + |
| Ulrich Herrlinger 2016 | ? | ? | ? | + | + | + | + | + | + |
| Zhixian Zhang 2018     | - | + | + | ? | + | + | + | + | + |
|                        |   |   |   |   |   |   |   |   |   |

Random sequence generation (selection bias)  
Allocation concealment (selection bias)  
Blinding of participants and personnel (performance bias)  
Blinding of outcome assessment (detection bias)  
Incomplete outcome data (attrition bias)  
Selective reporting (reporting bias)  
Other bias

Figure 2: bias risk assessment form

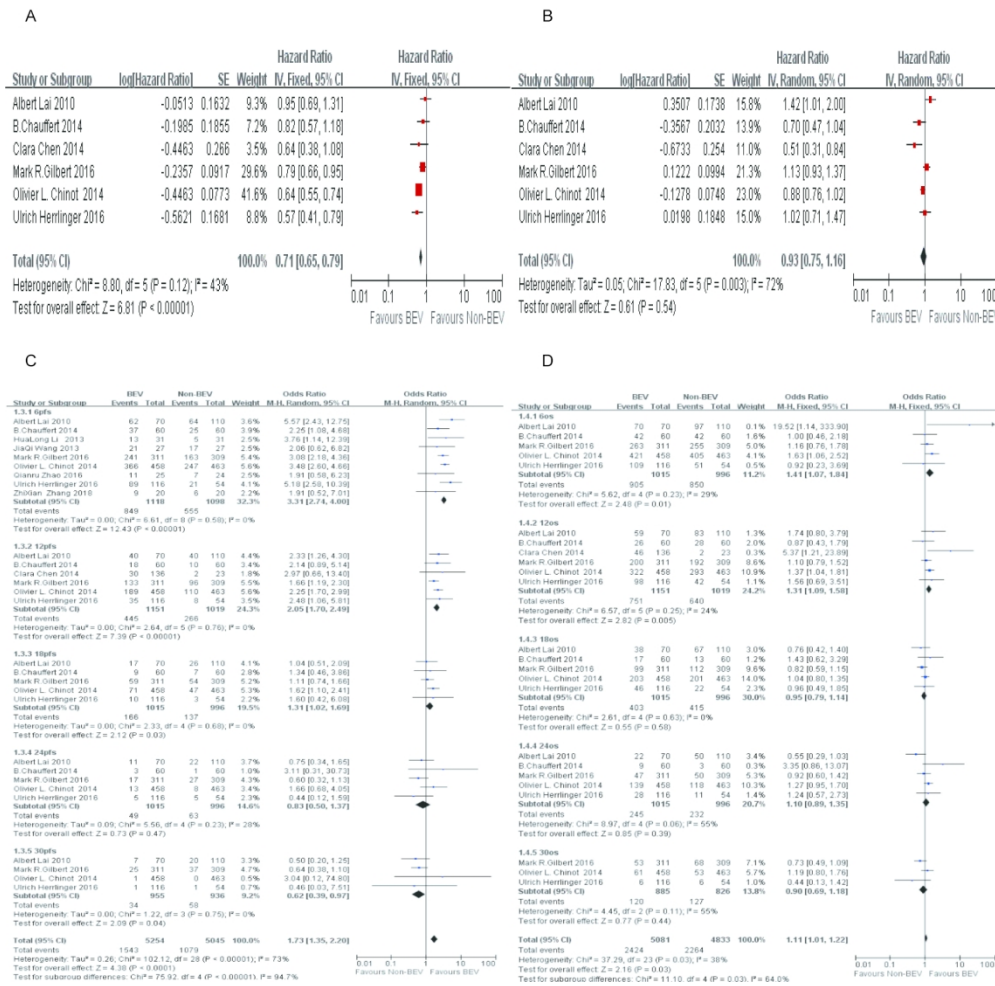

Figure 3 shows: A) HR of median PFS in BEV group and Non-BEV group in the treatment of glioma; B) HR of median OS in BEV group and Non-BEV group in the treatment of glioma; C) OR of PFS at each follow-up time in BEV group and Non-BEV group in the treatment of glioma; D) OR of OS at each follow-up time in the treatment of glioma in the BEV group and Non-BEV group

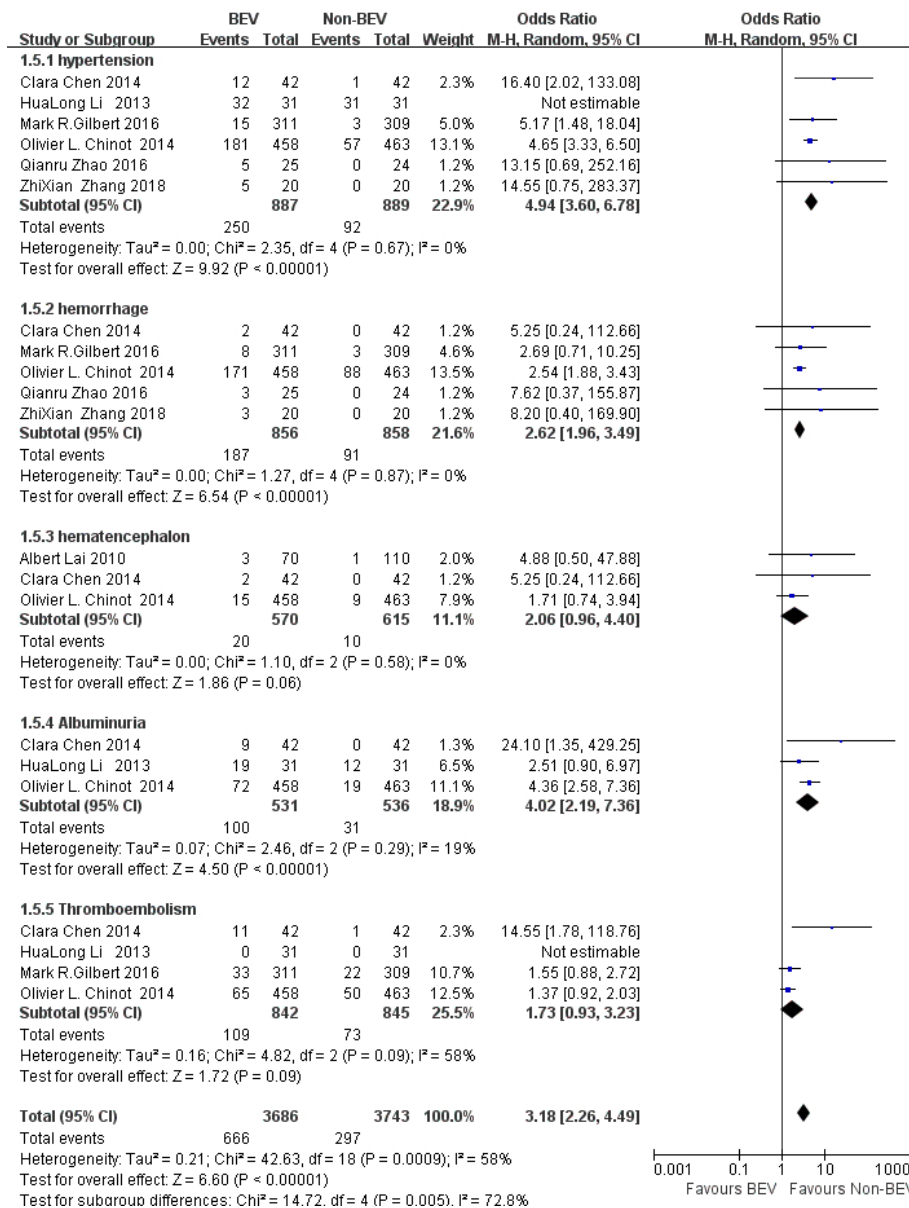

Figure 4: OR of adverse reactions in the treatment of glioma in the BEV group and Non-BEV group

150x196mm (120 x 120 DPI)

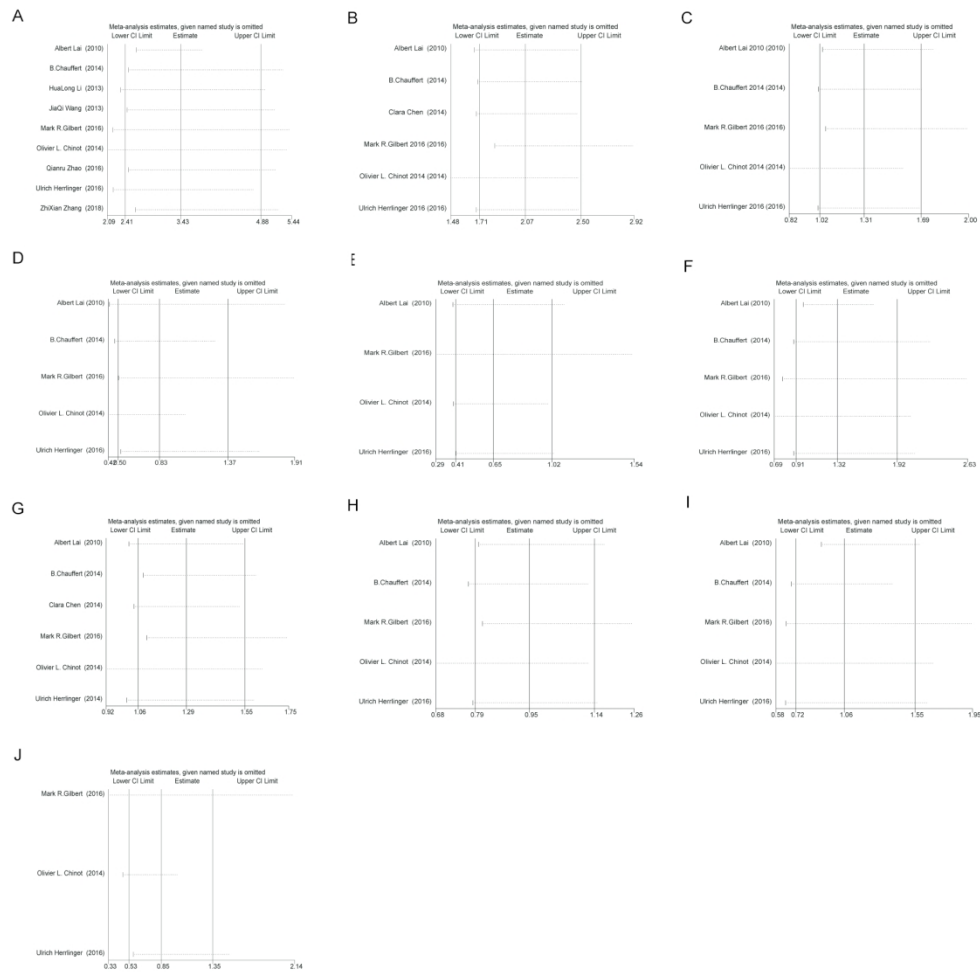

Figure 5 shows: Comparison of the sensitivity analysis offunnel at each follow-up time A) PFS6 combined with OR; B) PFS12 combined with OR; C) PFS18 combined with OR; D) PFS24 combined with OR; E) PFS30 combined with OR; F) OS6 combined with OR; G) OS12 combined with OR; H) OS18 combined with OR; I) OS24 combined with OR; J) OS30 combined with OR

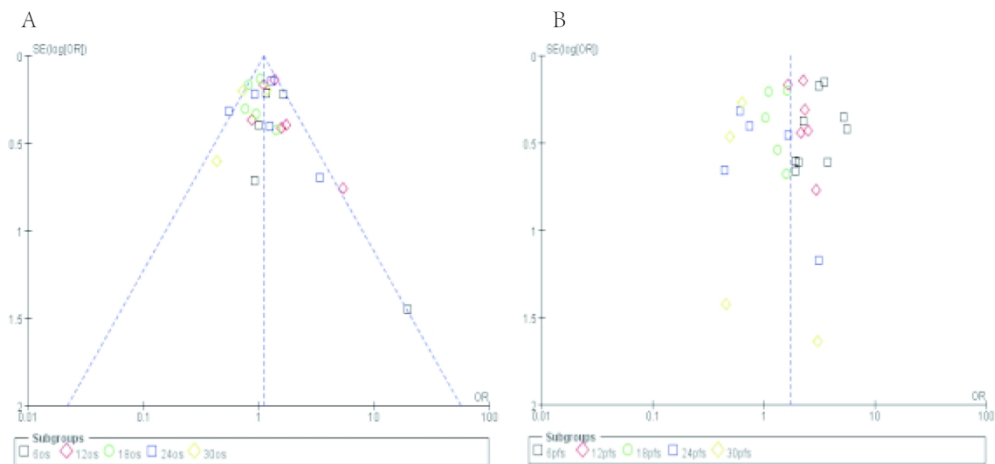

Figure 6 shows:A)The forest map shows:A)OS combined with OR funnel at each follow-up time;B) PFS and OR funnel diagram at each follow-up time



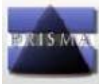

# PRISMA 2009 Checklist

1  
2  
3  
4  
5  
6  
7  
8  
9  
10  
11  
12  
13  
14  
15  
16  
17  
18  
19  
20  
21  
22  
23  
24  
25  
26  
27  
28  
29  
30  
31  
32  
33  
34  
35  
36  
37  
38  
39  
40  
41  
42  
43  
44  
45  
46  
47

| Section/topic      | # | Checklist item                                                                                                                                                                                                                                                                                                                                                                                                                                                                                                                                                                                                                                                                                                                                                                                                                                                                                                                                                                                                                                                                                                                                                                                                                                                                                                                                                                                                                                                                                                                                                                                                                                                                                                                                                                                                                                                                                                                                                                                        | Reported on page # |
|--------------------|---|-------------------------------------------------------------------------------------------------------------------------------------------------------------------------------------------------------------------------------------------------------------------------------------------------------------------------------------------------------------------------------------------------------------------------------------------------------------------------------------------------------------------------------------------------------------------------------------------------------------------------------------------------------------------------------------------------------------------------------------------------------------------------------------------------------------------------------------------------------------------------------------------------------------------------------------------------------------------------------------------------------------------------------------------------------------------------------------------------------------------------------------------------------------------------------------------------------------------------------------------------------------------------------------------------------------------------------------------------------------------------------------------------------------------------------------------------------------------------------------------------------------------------------------------------------------------------------------------------------------------------------------------------------------------------------------------------------------------------------------------------------------------------------------------------------------------------------------------------------------------------------------------------------------------------------------------------------------------------------------------------------|--------------------|
| <b>TITLE</b>       |   |                                                                                                                                                                                                                                                                                                                                                                                                                                                                                                                                                                                                                                                                                                                                                                                                                                                                                                                                                                                                                                                                                                                                                                                                                                                                                                                                                                                                                                                                                                                                                                                                                                                                                                                                                                                                                                                                                                                                                                                                       |                    |
| Title              | 1 | Systematic review and meta-analysis.                                                                                                                                                                                                                                                                                                                                                                                                                                                                                                                                                                                                                                                                                                                                                                                                                                                                                                                                                                                                                                                                                                                                                                                                                                                                                                                                                                                                                                                                                                                                                                                                                                                                                                                                                                                                                                                                                                                                                                  |                    |
| <b>ABSTRACT</b>    |   |                                                                                                                                                                                                                                                                                                                                                                                                                                                                                                                                                                                                                                                                                                                                                                                                                                                                                                                                                                                                                                                                                                                                                                                                                                                                                                                                                                                                                                                                                                                                                                                                                                                                                                                                                                                                                                                                                                                                                                                                       |                    |
| Structured summary | 2 | <p><b>Objective:</b> This study evaluated the efficacy and safety of bevacizumab in patients with glioma.</p> <p><b>Design:</b> Systematic review and meta-analysis.</p> <p><b>Data sources:</b> The data were collected using online search criteria from the databases like PubMed, Embase, The Cochrane Library, OVID biomedical database, Chinese periodical full-text database (CNKI), and Chinese biomedical literature service system (CBM) from inception up to April 2020.</p> <p><b>Intervention:</b> Bevacizumab (BEV) and other interventions.</p> <p><b>Primary and secondary outcome measures:</b> The main indicators included progression-free survival rate and overall survival rate, and the secondary indicators were adverse reactions.</p> <p><b>Results:</b> A total of 10 clinical center trials were included in this study for meta-analysis, including 2392 patients . The results of the meta-analysis showed that the median progression-free survival rate of the BEV group (PFS) was significantly higher than that of the Non-BEV group (P&lt;0.00001). When compared with the PFS rate of each stage, the PFS rate of the BEV group was 6 months (3.31, 95%CI 2.74 to 4.00, p&lt;0.00001), 12 months (2.05, 95%CI 1.70 to 2.49, p&lt;0.00001) and 18 months (1.31,95%CI 1.02 to 1.69, p=0.03). The PFS of the BEV group was higher than that of Non-BEV group at 24 months (0.83, 95%CI 0.50 to 1.37, p=0.47). At 30 months (0.62, 95%CI 0.39 to 0.97, p=0.04), the PFS of the Non-BEV group was lower than that of the Non-BEV group. Moreover, we have compared overall survival rate and the five common adverse reactions, including hypertension ,hemorrhage , and cerebral hemorrhage , Proteinuria and thromboembolism .</p> <p><b>Conclusion:</b> BEV can significantly prolong the PFS of patients with glioma within 18 months and shorten the PFS of patients after 30 months. This limitation may be related to the high incidence of adverse events</p> |                    |

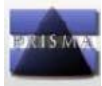

# PRISMA 2009 Checklist

1  
2  
3  
4  
5  
6  
7  
8  
9  
10  
11  
12  
13  
14  
15  
16  
17  
18  
19  
20  
21  
22  
23  
24  
25  
26  
27  
28  
29  
30  
31  
32  
33  
34  
35  
36  
37  
38  
39  
40  
41  
42  
43  
44  
45  
46  
47

caused by long-term use of BEV. More prospective studies are needed to verify it in the future.

## INTRODUCTION

Rationale

3

Brain glioma (High-Grade Glioma, HGG) is the most common primary intracranial tumor, accounting for about 27% of central nervous system tumors and 80% of intracranial malignant tumors<sup>1</sup>. The median survival time reported with brain glioma is 14-16 months<sup>2</sup>. The Surgical intervention combined with radiotherapy and chemotherapy are often followed for treatment of such cases, but because of its high invasive nature, it often relapses in a short time with poor prognosis. The emergence of temozolomide has considerably delayed the development of glioma to some extent, but the survival rate and quality of life of patients are still very low. Therefore, looking for better drugs to prevent and delay the postoperative recurrence of glioma has become the focus of current research. In recent years, more and more studies have shown that malignant glioma is the tumor with the highest degree of vascularization<sup>3</sup>. The nature of proliferation is characterized by obvious proliferative vascular lumen and with abnormal proliferation of neovascularization which participates in the construction of tumor microenvironment<sup>4</sup>. It is closely related to the growth, invasion, and metastasis of the tumor, and positively correlated with the extent of malignancy and prognosis of the tumor. Recently, the unique biological characteristics of gliomas indicated that angiogenic factors may play an important role in its treatment and have become the focus of research.

Humanized anti-vascular endothelial growth factor monoclonal antibody-bevacizumab<sup>5</sup>, as a representative drug of anti-angiogenic therapy, was approved for recurrent glioblastoma by FDA in 2009<sup>6</sup> and is listed in China in 2010 by CFDA. According to the radiological response rate, bevacizumab has been approved for recurrent glioblastoma in the United States and many other countries<sup>7,8</sup>. Although bevacizumab (BEV) has become an important part of HGG therapy, the safety and long-term efficacy of BEV are not clear. Therefore, we conducted a clinical meta-analysis to evaluate the safety and adverse reactions of BEV in patients with HGG, in order to provide a reference for clinical application.

Objectives

4

This study evaluated the efficacy and safety of bevacizumab in patients with glioma.

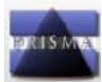

# PRISMA 2009 Checklist

1  
2  
3  
4  
5  
6  
7  
8  
9  
10  
11  
12  
13  
14  
15  
16  
17  
18  
19  
20  
21  
22  
23  
24  
25  
26  
27  
28  
29  
30  
31  
32  
33  
34  
35  
36  
37  
38  
39  
40  
41  
42  
43  
44  
45  
46  
47

|                           |   |                                                                                                                                                                                                                                                                                                                                                                                                                                                                                                                                                                                                                                                                                                                                                                                                                                                                                                                                                                                                                                                                                                                                                               |
|---------------------------|---|---------------------------------------------------------------------------------------------------------------------------------------------------------------------------------------------------------------------------------------------------------------------------------------------------------------------------------------------------------------------------------------------------------------------------------------------------------------------------------------------------------------------------------------------------------------------------------------------------------------------------------------------------------------------------------------------------------------------------------------------------------------------------------------------------------------------------------------------------------------------------------------------------------------------------------------------------------------------------------------------------------------------------------------------------------------------------------------------------------------------------------------------------------------|
| <b>METHODS</b>            |   |                                                                                                                                                                                                                                                                                                                                                                                                                                                                                                                                                                                                                                                                                                                                                                                                                                                                                                                                                                                                                                                                                                                                                               |
| Protocol and registration | 5 | Not Protocol and registration                                                                                                                                                                                                                                                                                                                                                                                                                                                                                                                                                                                                                                                                                                                                                                                                                                                                                                                                                                                                                                                                                                                                 |
| Eligibility criteria      | 6 | (1) Study subjects: the participants were patients of any age, whose histology was confirmed to be HGG. They may have undergone any form of surgery to achieve histological diagnosis (biopsy or resection); (2) Study type: The clinical control study; (3) Intervention: BEV in bevacizumab group must include bevacizumab, which can be used alone or in combination with multiple drugs. The control group (Non-BEV) refers to treatment that does not include anti-angiogenesis, which can be placebo or supportive therapy, or active intervention (such as chemotherapy). (4) Outcome indicators: included in accordance with the following arbitrary outcome indicators:① main indicators: progression-free survival (PFS)rate, defined as the time from randomization to death or disease progression of any cause, and overall survival(OS) rate, defined as the time from randomization to death. ② key indicators: adverse events classified according to the World Health Organization (WHO) or the General terminology Standard of the National Cancer Institute (NCI-CTCAE (CTCAE2017)), including the percentage of treatment-related deaths. |
| Information sources       | 7 | We collected all the clinical experimental studies of anti-angiogenic therapy in the treatment of gliomas, retrieved through a database search including PubMed database, Embase database, The Cochrane Library, CBM, Biomedical database, China Journal full-text database (CNKI), Wanfang, from the establishment of the database to April 2020.                                                                                                                                                                                                                                                                                                                                                                                                                                                                                                                                                                                                                                                                                                                                                                                                            |
| Search                    | 8 | The search strategy followed included a combination of subject words and free words, and the retrieval strategy was determined after several pre-searches. The main search words included: "glioma", "angiogenesis inhibitors", "vascular endothelial growth factors", "VEGF", and "clinical study". Additionally, we also manually searched the reference list of all articles on this topic to check and enhance the retrieval of other related publications. All search results are evaluated according to the (PRISMA) statement of "preferred reporting items for systematic review and meta-analysis".                                                                                                                                                                                                                                                                                                                                                                                                                                                                                                                                                  |
| Study selection           | 9 | Studies were included if they fulfilled the following criteria: The above eligibility criteria.<br>Studies were excluded if they fulfilled the following conditions: Non-clinical control studies, incomplete                                                                                                                                                                                                                                                                                                                                                                                                                                                                                                                                                                                                                                                                                                                                                                                                                                                                                                                                                 |



# PRISMA 2009 Checklist

1  
2  
3  
4  
5  
6  
7  
8  
9  
10  
11  
12  
13  
14  
15  
16  
17  
18  
19  
20  
21  
22  
23  
24  
25  
26  
27  
28  
29  
30  
31  
32  
33  
34  
35  
36  
37  
38  
39  
40  
41  
42  
43  
44  
45  
46  
47

|                                    |    |                                                                                                                                                                                                                                                                                                                                                                                                                                                                                                                                                                                                                            |  |
|------------------------------------|----|----------------------------------------------------------------------------------------------------------------------------------------------------------------------------------------------------------------------------------------------------------------------------------------------------------------------------------------------------------------------------------------------------------------------------------------------------------------------------------------------------------------------------------------------------------------------------------------------------------------------------|--|
|                                    |    | abstract information, conference papers, reviews, and case reports. In addition, the literature of repeated publication and incomplete data that cannot extract valid data should also be excluded.                                                                                                                                                                                                                                                                                                                                                                                                                        |  |
| Data collection process            | 10 | Literature screening, data extraction, and cross-checking were carried out by two independent researchers according to the initial inclusion and exclusion criteria, and if there were any differences, it was discussed or judged with the assistance of a third person, and contact and supplement the missing data with the author as far as possible. During the literature screening, the title and the abstract were read initially, and after excluding the obviously irrelevant literature, the full text was read to determine whether to include it or not. Upon matching the inclusion criteria of requirements |  |
| Data items                         | 11 | the following contents were extracted: (1) the basic information, including title, author, published country, publication date, research type; (2) study subjects, including the number of cases in each group, average age; (3) interventional factors, including the specific details of exposure factors, follow-up time, etc.; (4) the outcome indicators.                                                                                                                                                                                                                                                             |  |
| Risk of bias in individual studies | 12 | Using the Cochrane collaboration tool, the risk of bias in individual studies was assessed from seven aspects (sequence generation, allocation hiding, uninformed participants and people, incomplete outcome data, selective reports, and other biases and risks) <sup>9</sup> . Finally, each project was evaluated at three levels: low risk, unclear, and high risk. The two authors conducted independent quality assessments and any differences among them were resolved through discussions with a third research expert.                                                                                          |  |
| Summary measures                   | 13 | PFS, OS, and adverse reactions were analyzed by Meta with RevMan5.1 software. The data were counted by risk ratio (hazard ratio; HR) and odds ratio (Odds ratio; OR). The interval estimation was expressed by 95%CI, and the test level of the effect quantity was $\alpha = 0.05$ .                                                                                                                                                                                                                                                                                                                                      |  |
| Synthesis of results               | 14 | The heterogeneity among the included results was analyzed by using the "I <sup>2</sup> " (the level is $\alpha = 0.1$ a). Simultaneously, combined with I <sup>2</sup> to quantitatively judge the size of heterogeneity.                                                                                                                                                                                                                                                                                                                                                                                                  |  |

| Section/topic | # | Checklist item | Reported on page # |
|---------------|---|----------------|--------------------|
|---------------|---|----------------|--------------------|

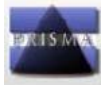

## PRISMA 2009 Checklist

1  
2  
3  
4  
5  
6  
7  
8  
9  
10  
11  
12  
13  
14  
15  
16  
17  
18  
19  
20  
21  
22  
23  
24  
25  
26  
27  
28  
29  
30  
31  
32  
33  
34  
35  
36  
37  
38  
39  
40  
41  
42  
43  
44  
45  
46  
47

|                             |    |                                                                                                                                                                                                                                                                                                                                                                                                                                                                                             |  |
|-----------------------------|----|---------------------------------------------------------------------------------------------------------------------------------------------------------------------------------------------------------------------------------------------------------------------------------------------------------------------------------------------------------------------------------------------------------------------------------------------------------------------------------------------|--|
| Risk of bias across studies | 15 | Publication bias was detected by the funnel chart method.                                                                                                                                                                                                                                                                                                                                                                                                                                   |  |
| Additional analyses         | 16 | Stata15.1 was used for sensitivity analysis, and the method of examining the influence of a single study was used to eliminate them one by one. The consistency of the results obtained after the above transformation shows that the results of Meta-analysis were stable, otherwise, they were regarded as unstable.                                                                                                                                                                      |  |
| <b>RESULTS</b>              |    |                                                                                                                                                                                                                                                                                                                                                                                                                                                                                             |  |
| Study selection             | 17 | A total of 1108 related literature were obtained in the initial examination. After screening the literature one by one, a total of 1123 patients were included in 10 clinical studies <sup>10-19</sup> . The database and the number of documents retrieved are as follows: PubMed (nasty 259), The Cochrane Library (nasty 153), EMBASE (nasty 155), CNKI (nasty 118), CBM (nasty 358), WangFang (nasty 65). The flow chart and the results of literature retrieval are shown in figure 1. |  |
| Study characteristics       | 18 | <p><b>The basic characteristics of the inclusion study</b></p> <p>For the inclusion study, the basic information for inclusion is completed using pre-developed forms (Tables 1, 2).</p> <p><b>Offset risk included in the study</b></p> <p>The results of the bias risk assessment included in the study are shown in figure 2.</p>                                                                                                                                                        |  |
| Risk of bias within studies | 19 | <p><b>Publication bias</b></p> <p>As shown in figures 6 (see appendix), except for the adverse reactions and the funnel chart of the median OS with HR, the publication bias of the funnel chart was higher, while the rest of the funnel chart was mainly concentrated at the top. Moreover, the symmetry was also proper, so it was concluded that the possibility of publication bias was small.</p>                                                                                     |  |



# PRISMA 2009 Checklist

1  
2  
3  
4  
5  
6  
7  
8  
9  
10  
11  
12  
13  
14  
15  
16  
17  
18  
19  
20  
21  
22  
23  
24  
25  
26  
27  
28  
29  
30  
31  
32  
33  
34  
35  
36  
37  
38  
39  
40  
41  
42  
43  
44  
45  
46  
47

|                               |    |                                                                                                                                                                                                                                                                                                                                                                                                                                                                                                                                                                                                                                                                                                                                                                                                                                                                                                                                                                                                                                                                                                                                                                                                                                                                                                                                                                                                   |
|-------------------------------|----|---------------------------------------------------------------------------------------------------------------------------------------------------------------------------------------------------------------------------------------------------------------------------------------------------------------------------------------------------------------------------------------------------------------------------------------------------------------------------------------------------------------------------------------------------------------------------------------------------------------------------------------------------------------------------------------------------------------------------------------------------------------------------------------------------------------------------------------------------------------------------------------------------------------------------------------------------------------------------------------------------------------------------------------------------------------------------------------------------------------------------------------------------------------------------------------------------------------------------------------------------------------------------------------------------------------------------------------------------------------------------------------------------|
| Results of individual studies | 20 | <p><b>Progression-free survival</b></p> <p>Six studies<sup>10,12-14,18-19</sup> reported median progression-free survival (BEV group, n=1160) and Non-BEV group (n=1027). Results: HR=0.71, 95%CI, 0.65 to 0.79; suggested that the median progression-free survival of gliomas treated with BEV was significantly longer than that of malignant gliomas treated with Non-BEV (P&lt;0.00001), as shown A in figure 3 .</p> <p><b>Overall survival time</b></p> <p>Six studies<sup>10,12-14,18-19</sup> reported the median overall survival time, and there was no significant difference in the heterogeneity test (<math>I^2=72%</math>, <math>p=0.54</math>), so the random effect model was used for data analysis. Results: HR=0.93, 95%CI, 0.75 to 1.16, suggesting that there was no significant difference in median overall survival time between the BEV group and Non-BEV group (P=0.54), as shown B in figure 3 .</p> <p><b>Adverse reaction</b></p> <p>The results showed the combined OR values of hypertension, hemorrhage, cerebral hemorrhage, albuminuria, and thromboembolism as follows: hypertension (4.94, 95%CI 3.60 to 6.78, P&lt;0.00001), hemorrhage (2.62, 95%CI 1.96 to 3.49, P&lt;0.00001), cerebral hemorrhage (2.06, 95%CI 0.96 to 4.40, P=0.05), proteinuria (4.02, 95%CI 2.19 to 7.36, P&lt;0.00001) and thromboembolism (1.73, 95%CI 0.93 to 3.23, P=0.09).</p> |
| Synthesis of results          | 21 | <p><b>Progression-free survival</b></p> <p>Ten studies<sup>10-19</sup> compared PFS ratios at different follow-up between the Bev group and the Non-BEV group. There was a significant difference in the total heterogeneity test (<math>I^2=71%</math>, <math>P&lt;0.00001</math>), so the random effect model was used. The results showed that the combined OR values of 6 months, 12 months, 18 months, 24 months and 30 months are (3.31, 95%CI 2.74 to 4.00, <math>p&lt;0.00001</math>), (2.05, 95%CI 1.70 to 2.49, <math>p&lt;0.00001</math>), (1.31, 95%CI 1.02 to 1.69, <math>p=0.03</math>), (0.83, 95%CI 0.50 to 1.37, <math>p=0.47</math>), (0.62, 95%CI 0.39 to 0.97, <math>p=0.04</math>), as shown C in figure 3 .</p> <p><b>Overall survival time</b></p> <p>For peer review only - <a href="http://bmjopen.bmj.com/site/about/guidelines.xhtml">http://bmjopen.bmj.com/site/about/guidelines.xhtml</a></p>                                                                                                                                                                                                                                                                                                                                                                                                                                                                       |

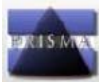

# PRISMA 2009 Checklist

1  
2  
3  
4  
5  
6  
7  
8  
9  
10  
11  
12  
13  
14  
15  
16  
17  
18  
19  
20  
21  
22  
23  
24  
25  
26  
27  
28  
29  
30  
31  
32  
33  
34  
35  
36  
37  
38  
39  
40  
41  
42  
43  
44  
45  
46  
47

|                             |    |                                                                                                                                                                                                                                                                                                                                                                                                                                                                                                                                                                                                                                                                                                                                                                                                                                                                                                                                                                                                                                               |  |
|-----------------------------|----|-----------------------------------------------------------------------------------------------------------------------------------------------------------------------------------------------------------------------------------------------------------------------------------------------------------------------------------------------------------------------------------------------------------------------------------------------------------------------------------------------------------------------------------------------------------------------------------------------------------------------------------------------------------------------------------------------------------------------------------------------------------------------------------------------------------------------------------------------------------------------------------------------------------------------------------------------------------------------------------------------------------------------------------------------|--|
|                             |    | <p>Six studies<sup>10,12-14,18-19</sup> compared OS ratios at different follow-up between the Bev group and the Non-BEV group. There was a significant difference in the total heterogeneity test (<math>I^2=38\%</math>, <math>P&lt;0.03</math>). The Random effect model was used, and the results show that the combined OR values of 6 months, 12 months, 18 months, 24 months, and 36 months are (4.94, 95%CI 3.60-6.78, <math>P&lt;0.00001</math>), (2.62, 95%CI 1.96-3.49, <math>P&lt;0.00001</math>), (2.06, 95%CI 0.96-4.40, <math>P=0.05</math>), (4.02, 95%CI 2.19-7.36, <math>P&lt;0.00001</math>), (1.73, 95%CI 0.93-3.23, <math>P=0.09</math>), as shown D in figure 3 .</p> <p><b>Adverse reaction</b></p> <p>As shown in figure 4, there were six studies<sup>10-11,13-15</sup> that compared adverse reactions between the BEV group and the Non-BEV group. There was a significant difference in the total heterogeneity test (<math>I^2=58\%</math>, <math>P&lt;0.00001</math>), and the random effect model was used.</p> |  |
| Risk of bias across studies | 22 | <p>As shown in figures 6 (see appendix), except for the adverse reactions and the funnel chart of the median OS with HR, the publication bias of the funnel chart was higher, while the rest of the funnel chart was mainly concentrated at the top. Moreover, the symmetry was also proper, so it was concluded that the possibility of publication bias was small.</p>                                                                                                                                                                                                                                                                                                                                                                                                                                                                                                                                                                                                                                                                      |  |
| Additional analysis         | 23 | <p>The sensitivity test was used to evaluate the stability of OS, PFS, and adverse reactions in the included literature, which showed that all values remained in the confidence interval on both sides after one by one elimination. Hence, it can be concluded that all the included literature is stable, as shown in figures 5 .</p>                                                                                                                                                                                                                                                                                                                                                                                                                                                                                                                                                                                                                                                                                                      |  |
| <b>DISCUSSION</b>           |    |                                                                                                                                                                                                                                                                                                                                                                                                                                                                                                                                                                                                                                                                                                                                                                                                                                                                                                                                                                                                                                               |  |
| Summary of evidence         | 24 | <p>Studies have shown that long-term use of BEV does not increase patients' PFS, on the contrary, it may decrease PFS over time, due to the adverse reactions caused by BEV. This study showed five common adverse reactions including hypertension, hemorrhage, cerebral hemorrhage, albuminuria, and thromboembolism upon initiating BEV therapy, but the toxicity of antiangiogenic therapy was generally well tolerated. A phase II trial of Japanese study<sup>35</sup> showed that the most common side effects were albuminuria, hypertension, hemorrhage, fever, and epilepsy. Studies<sup>36</sup> showed that the incidence of adverse reactions above grade 3 was 27.1% to 46.4%. The most common events reported were thromboembolism,</p>                                                                                                                                                                                                                                                                                        |  |



## PRISMA 2009 Checklist

1  
2  
3  
4  
5  
6  
7  
8  
9  
10  
11  
12  
13  
14  
15  
16  
17  
18  
19  
20  
21  
22  
23  
24  
25  
26  
27  
28  
29  
30  
31  
32  
33  
34  
35  
36  
37  
38  
39  
40  
41  
42  
43  
44  
45  
46  
47

hypertension, epilepsy, fatigue, and intestinal perforation. Zhang Li<sup>37</sup> evaluated cases from 20 articles about adverse reactions caused by BEV in 357 patients and found that the main adverse reactions were associated with cardiovascular and hematological diseases. Norden<sup>38</sup> evaluated 64 glioma patients treated with anticoagulants with BEV and those without anticoagulants. The results showed that the rates of intracranial hemorrhage and other bleeding sites in patients treated with anticoagulants were significantly higher than those in patients treated with BEV alone. However, the rate of severe intracranial hemorrhage was within an acceptable range, hence the anticoagulants were recommended for patients with symptomatic venous thrombosis treated with BEV. Therefore, when bevacizumab was used in the clinic, it was necessary to closely observe for any adverse drug reactions, monitor blood pressure, blood coagulation function, and other indexes, and deal with the symptoms in time. We also need more large-scale phase III clinical studies to prove whether PFS can be improved by improving adverse reactions. Collectively, improving the PFS may enhance great economic and survival benefits to the patients and society, and may further reinforce the successful therapeutic applications of BEV in gliomas.

Limitations

25

In this study, the preoperative symptoms and the scope and degree of surgical resection are not taken into account. Hence, a large study in terms of more samples and higher quality clinical parameters may further validate the conclusive evidence.

Conclusions

26

The evidence suggests that BEV can significantly prolong the PFS of patients with glioma within 18 months and shorten the PFS of patients after 30 months. This limitation may be related to the higher incidence of adverse events caused by the long-term use of BEV. In this study, the preoperative symptoms and the scope and degree of surgical resection are not taken into account. Hence, a large study in terms of more samples and higher quality clinical parameters may further validate the conclusive evidence.

### FUNDING

Funding

27

This research received no specific grant from any funding agency in the public, commercial or not-for-profit sectors For peer review only - <http://bmjopen.bmj.com/site/about/guidelines.xhtml>



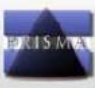

# PRISMA 2009 Checklist

1  
2  
3  
4  
5  
6  
7  
8  
9  
10  
11  
12  
13  
14  
15  
16  
17  
18  
19  
20  
21  
22  
23  
24  
25  
26  
27  
28  
29  
30  
31  
32  
33  
34  
35  
36  
37  
38  
39  
40  
41  
42  
43  
44  
45  
46  
47

From: Moher D, Liberati A, Tetzlaff J, Altman DG, The PRISMA Group (2009). Preferred Reporting Items for Systematic Reviews and Meta-Analyses: The PRISMA Statement. PLoS Med 6(7): e1000097. doi:10.1371/journal.pmed1000097

For more information, visit: [www.prisma-statement.org](http://www.prisma-statement.org).

Page 2 of 2

For peer review only

# BMJ Open

## Efficacy and safety of bevacizumab in the treatment of adult gliomas: a systematic review and meta-analysis

|                                 |                                                                                                                                                                                                                                                                                                                                                                                                                                        |
|---------------------------------|----------------------------------------------------------------------------------------------------------------------------------------------------------------------------------------------------------------------------------------------------------------------------------------------------------------------------------------------------------------------------------------------------------------------------------------|
| Journal:                        | <i>BMJ Open</i>                                                                                                                                                                                                                                                                                                                                                                                                                        |
| Manuscript ID                   | bmjopen-2021-048975.R1                                                                                                                                                                                                                                                                                                                                                                                                                 |
| Article Type:                   | Original research                                                                                                                                                                                                                                                                                                                                                                                                                      |
| Date Submitted by the Author:   | 26-May-2021                                                                                                                                                                                                                                                                                                                                                                                                                            |
| Complete List of Authors:       | Wang, huan; Xi'an Jiaotong University Medical College First Affiliated Hospital,<br>Fan, Xiaoxuan; Shaanxi University of Chinese Medicine, The First Affiliated Hospital<br>Zhao, Xiaoping; Shaanxi University of Chinese Medicine, The First Affiliated Hospital<br>wang, kai; Shaanxi University of Chinese Medicine<br>Ma, Sitian; Shaanxi University of Chinese Medicine<br>Yang, Yongfeng; Shaanxi University of Chinese Medicine |
| <b>Primary Subject Heading</b>: | Oncology                                                                                                                                                                                                                                                                                                                                                                                                                               |
| Secondary Subject Heading:      | Patient-centred medicine                                                                                                                                                                                                                                                                                                                                                                                                               |
| Keywords:                       | NEUROSURGERY, ONCOLOGY, Head & neck tumours < ONCOLOGY                                                                                                                                                                                                                                                                                                                                                                                 |
|                                 |                                                                                                                                                                                                                                                                                                                                                                                                                                        |

SCHOLARONE™  
Manuscripts



I, the Submitting Author has the right to grant and does grant on behalf of all authors of the Work (as defined in the below author licence), an exclusive licence and/or a non-exclusive licence for contributions from authors who are: i) UK Crown employees; ii) where BMJ has agreed a CC-BY licence shall apply, and/or iii) in accordance with the terms applicable for US Federal Government officers or employees acting as part of their official duties; on a worldwide, perpetual, irrevocable, royalty-free basis to BMJ Publishing Group Ltd ("BMJ") its licensees and where the relevant Journal is co-owned by BMJ to the co-owners of the Journal, to publish the Work in this journal and any other BMJ products and to exploit all rights, as set out in our [licence](#).

The Submitting Author accepts and understands that any supply made under these terms is made by BMJ to the Submitting Author unless you are acting as an employee on behalf of your employer or a postgraduate student of an affiliated institution which is paying any applicable article publishing charge ("APC") for Open Access articles. Where the Submitting Author wishes to make the Work available on an Open Access basis (and intends to pay the relevant APC), the terms of reuse of such Open Access shall be governed by a Creative Commons licence – details of these licences and which [Creative Commons](#) licence will apply to this Work are set out in our licence referred to above.

Other than as permitted in any relevant BMJ Author's Self Archiving Policies, I confirm this Work has not been accepted for publication elsewhere, is not being considered for publication elsewhere and does not duplicate material already published. I confirm all authors consent to publication of this Work and authorise the granting of this licence.

Efficacy and safety of bevacizumab in the treatment of adult gliomas:a systematic review and meta-analysis

Wang Huan<sup>1</sup> Fan Xiaoxuan<sup>2</sup> Zhao Xiaoping<sup>2</sup> Wang Kai<sup>3</sup> Ma Sitian<sup>3</sup>  
Yang Yongfeng<sup>3</sup>

1.The First Affiliated Hospital of Xi'an Jiaotong University, Xi'an, China, 710000

2. Affiliated Hospital of Shaanxi University of Traditional Chinese Medicine, Xianyang , China, 712000

3. Shaanxi University of Traditional Chinese Medicine, Xianyang , China, 712000

Correspondence to Fan Xiaoxuan; szfyfx@163.com

Keywords : glioma,Bevacizumab,efficacy,safety,progression-free survival

Number of words:3833

## ABSTRACT

**Objective** To assess the efficacy and safety of bevacizumab in patients with glioma.

**Design** Systematic review and meta-analysis.

**Participants** Adults aged 18 years and above, whose histology was confirmed to be malignant glioma.

**Intervention:** Bevacizumab and other interventions.

**Primary and secondary outcome measures:** The main indicators included progression-free survival rate and overall survival rate, and the secondary indicators were adverse reactions.

**Results:** A total of 10 clinical center trials were included in this study for meta-analysis, including 2392 patients . The results of the meta-analysis showed that the median progression-free survival(PFS) rate of the BEV group was significantly higher than that of the Non-BEV group ( $P<0.00001$ ). When compared with the PFS rate of each stage,it was found that the PFS in the BEV group was higher than that in the Non-BEV group at 6 months (3.31, 95%CI 2.74 to 4.00,  $p<0.00001$ ), 12 months (2.05, 95%CI 1.70 to 2.49,  $p<0.00001$ ) and 18 months (1.31,95%CI 1.02 to 1.69,  $p=0.03$ ).But at 24 months (0.83, 95%CI 0.50 to 1.37,  $p=0.47$ ), there was no significant difference between the two groups.At 30 months (0.62, 95%CI 0.39 to 0.97,  $p=0.04$ ), the PFS of the BEV group was lower than that of the Non-BEV group.Moreover, The results showed that BEV had no significant effect on improving OS, but the adverse reaction in BEV group was significantly higher than that in non-BEV group.

**Conclusion:**The evidence suggests that BEV can significantly prolong the PFS of patients with glioma within 18 months and shorten the PFS of patients after 30 months. This limitation may be related to the subgroup of patients, the change of recurrence mode, the optimal dose of drug, the increase of hypoxia, the enhancement of invasiveness and so on.Therefore, it is necessary to carry out more samples and higher quality large-scale research in the future.

### Strengths and Limitations of this study

1. We used the Cochrane criteria to assess the risk of bias.
2. The heterogeneity was explored by sensitivity, sub-group.
3. the quality of included studies was largely mod-erate to high.
4. The preoperative symptoms and the scope and degree of surgical resection are not taken into account.

### INTRODUCTION

Brain glioma is the most common primary intracranial tumor, accounting for about 27% of central nervous system tumors and 80% of intracranial malignant tumors<sup>1</sup>. The median survival time reported with brain glioma is 14-16 months<sup>2</sup>. The Surgical intervention combined with radiotherapy and chemotherapy are often followed for treatment of such cases, but because of its high invasive nature, it often relapses in a short time with poor prognosis. The emergence of temozolomide has considerably delayed the development of glioma to some extent, but the survival rate and quality of life of patients are still very low. Therefore, looking for better drugs to prevent and delay the postoperative recurrence of glioma has become the focus of current research. In recent years, more and more studies have shown that malignant glioma is the tumor with the highest degree of vascularization<sup>3</sup>. The nature of proliferation is characterized by obvious proliferative vascular lumen and with abnormal proliferation of neovascularization which participates in the construction of tumor microenvironment<sup>4</sup>. It is closely related to the growth, invasion, and metastasis of the tumor, and positively correlated with the extent of malignancy and prognosis of the tumor. Recently, the unique biological characteristics of gliomas indicated that angiogenic factors may play an important role in its treatment and have become the focus of research.

Humanized anti-vascular endothelial growth factor monoclonal antibody-bevacizumab<sup>5</sup>, as a representative drug of anti-angiogenic therapy, was approved for recurrent glioblastoma by FDA in 2009<sup>6</sup> and is listed in China in 2010 by CFDA. According to the radiological response rate, bevacizumab has been approved for recurrent glioblastoma in the United States and many other countries<sup>7,8</sup>. Although bevacizumab (BEV) has become an important part of HGG therapy, the safety and long-term efficacy of BEV are not clear. Therefore, we conducted a clinical meta-analysis to evaluate the safety and adverse reactions of BEV in patients with HGG, in order to provide a reference for clinical application.

### METHODS

This study was mainly based on the literature research, hence there is no need for ethical identification.

## Search strategy

We collected all the clinical experimental studies of anti-angiogenic therapy in the treatment of gliomas, retrieved through a database search including PubMed, Embase, The Cochrane Library, WanFang, Chinese periodical full-text database (CNKI), and Chinese biomedical literature service system (CBM), from the establishment of the database to April 2020. The search strategy followed included a combination of subject words and free words, and the retrieval strategy was determined after several pre-searches. The main search words included: "glioma", "angiogenesis inhibitors", "vascular endothelial growth factors", "VEGF", and "clinical study". Additionally, we also manually searched the reference list of all articles on this topic to check and enhance the retrieval of other related publications. All search results are evaluated according to the (PRISMA) statement of "preferred reporting items for systematic review and meta-analysis".

## Selection criteria

Studies were included if they fulfilled the following criteria: (1) Study subjects: the participants were adults aged 18 years and above, whose histology was confirmed to be malignant glioma. They may have undergone any form of surgery to achieve histological diagnosis (biopsy or resection); (2) Study type: The clinical control study; (3) Intervention: BEV in bevacizumab group must include bevacizumab, which can be used alone or in combination with multiple drugs. The control group (Non-BEV) refers to treatment that does not include anti-angiogenesis, which can be placebo or supportive therapy, or active intervention (such as chemotherapy). (4) Outcome indicators: included in accordance with the following arbitrary outcome indicators: ① main indicators: progression-free survival rate, defined as the time from randomization to death or disease progression of any cause, and overall survival rate, defined as the time from randomization to death. ② key indicators: adverse events classified according to the World Health Organization (WHO) or the General terminology Standard of the National Cancer Institute (NCI-CTCAE (CTCAE2017)), including the percentage of treatment-related deaths.

Studies were excluded if they fulfilled the following conditions: Non-clinical control studies, incomplete abstract information, conference papers, reviews, and case reports. In addition, the literature of repeated publication and incomplete data that cannot extract valid data should also be excluded.

## Data extraction

Literature screening, data extraction, and cross-checking were carried out by two independent researchers according to the initial inclusion and exclusion criteria, and if there were any differences, it was discussed or judged with the assistance of a third person, and contact and supplement the missing data with the author as far as possible. During the literature screening, the title and the abstract were read initially, and after excluding the obviously irrelevant literature, the full text was read to determine whether to include it or not. Upon matching the inclusion criteria of requirements, the following contents were extracted: (1) the basic information, including title, author, published country, publication date, research type; (2) study subjects, including the number of cases in each group, average age; (3) interventional factors, including the specific details of exposure factors, follow-up time, etc.; and (4) the outcome indicators.

### Quality assessment

Using the Cochrane collaboration tool, the risk of bias in individual studies was assessed from seven aspects (sequence generation, allocation hiding, uninformed participants and people, incomplete outcome data, selective reports, and other biases and risks)<sup>9</sup>. Finally, each project was evaluated at three levels: low risk, unclear, and high risk. The two authors conducted independent quality assessments and any differences among them were resolved through discussions with a third research expert.

### Statistical analysis

#### Analysis of outcome index

PFS, OS, and adverse reactions were analyzed by Meta with RevMan5.1 software. The dichotomy data is expressed as the combined risk ratio (RR) or risk ratio (hazard ratio; HR), The measurement data is expressed as the mean difference (WMD). The interval estimation was expressed by 95%CI, and the test level of the effect quantity was  $\alpha = 0.05$ . The test for heterogeneity used  $I^2$  statistics. If there is no significant heterogeneity among studies ( $I^2 \leq 50\%$ ), we used the fixed effects model for data consolidation. While there is significant heterogeneity ( $I^2 > 50\%$ ) between the results of the study, the random effects model for data analysis would be used.

#### Sensitivity analysis

Simultaneously, stata15.1 was used for sensitivity analysis, adopt the method of examining the impact of individual studies and eliminate them one by one, if the

value obtained is within the confidence interval on both sides, the result is stable. otherwise, they were regarded as unstable. Studies included in literature > 10 were used to detect publication bias by funnel chart.

## RESULT

### Literature screening

A total of 1108 related literature were obtained in the initial examination. After screening the literature one by one, a total of 1123 patients were included in 10 clinical studies<sup>10-19</sup>. The flow chart and the results of literature retrieval are shown in figure 1.

### The basic characteristics of the inclusion study

For the inclusion study, the basic information for inclusion is completed using pre-developed forms (Tables 1, 2).

Table 1: basic information for inclusion in the study

| Study                                                    | State       | Res<br>earc<br>h<br>type | Cases<br>(experime<br>ntal/<br>control ) | Ages(exper<br>imental /<br>control ) | Follow-up<br>time                                                | Outcom                                                                   |
|----------------------------------------------------------|-------------|--------------------------|------------------------------------------|--------------------------------------|------------------------------------------------------------------|--------------------------------------------------------------------------|
| Olivier<br>L.<br>Chinot,<br>M.D <sup>2014</sup> [<br>10] | France      | RCT                      | 458/463                                  | 20-84/18-7<br>9                      | The last<br>patient<br>was<br>hospitalize<br>d for 17<br>months. | 1and2year survival<br>rates 、 safety and<br>quality of life、 PFS<br>、 OS |
| Qianru<br>Zhao <sup>2016</sup> [<br>11]                  | China       | RCT                      | 25/24                                    | 24-71/27-<br>8                       | The<br>median<br>follow-up<br>time was<br>7.9 months             | disease control<br>rate 、 median<br>survival time、 OS<br>、 PFS           |
| Ulrich<br>Herrlinge<br>r <sup>2016</sup> [12]            | German<br>y | RCT                      | 116/54                                   | 25-78/26-7<br>8                      | Long-term<br>follow-up<br>until death                            | PFS-6、 PFS、 OS                                                           |



|                                         |         |         |          |                         |                |                             |
|-----------------------------------------|---------|---------|----------|-------------------------|----------------|-----------------------------|
| Mark R. Gilbert<br>2016 <sup>[13]</sup> | Germany | RCT     | 320/317  | >18                     | 6 cycles       | OS, PFS                     |
| Clara Chen<br>2014 <sup>[14]</sup>      | America | Non-RCT | 57/79/23 | 30-77/24-82/19-78       | >1year         | OS, PFS                     |
| Hualong Li<br>2020 <sup>[15]</sup>      | China   | RCT     | 31/31    | 18-70/19-69             | 4 months       | PFS6, DCR, Adverse reaction |
| Zhixian Zhang<br>2018 <sup>[16]</sup>   | China   | RCT     | 20/20    | 24-74                   | 5.2-18months   | PFS6, OS12                  |
| Jiaqi Wang<br>2013 <sup>[17]</sup>      | China   | RCT     | 27/27    | 53.6 ± 9.7 / 54.7 ± 8.8 | 6months-2years | RR, DCR, Adverse reaction   |
| Albert Lai<br>2010 <sup>[18]</sup>      | America | RCT     | 70/110   | 31.3-75.8 / 20.5-90     | >42months      | OS, PFS, Adverse reaction   |
| B.Chaffert<br>2014 <sup>[19]</sup>      | Britain | RCT     | 60/60    | 43-69/43-71             | 6 months       | OS, PFS, Adverse reaction   |

Table 2: basic characteristics of the inclusion study

| Study                                  | Male                    | Female                  | Open biopsy          | Partial resection       | Complete resection      | experimental/control                     |
|----------------------------------------|-------------------------|-------------------------|----------------------|-------------------------|-------------------------|------------------------------------------|
| Olivier L. Chinot, M.D <sup>2014</sup> | 282 (61.6) / 298 (64.4) | 176 (38.4) / 165 (35.6) | 60 (13.1) / 44 (9.5) | 210 (45.9) / 223 (48.2) | 188 (41.0) / 196 (42.3) | Bevacizumab+ RT - TMZ / Placebo+RT - TMZ |

|                                       |                           |                                      |                    |                          |                            |                                                                                  |
|---------------------------------------|---------------------------|--------------------------------------|--------------------|--------------------------|----------------------------|----------------------------------------------------------------------------------|
| Qianru Zhao <sup>2016</sup>           | 14/12                     | 11/12                                | /                  | 15/16                    | 10/8                       | BEV+TMZ/TMZ                                                                      |
| Ulrich Herrlinge<br>r <sup>2016</sup> | 80 (69.0)<br>/34 (63.0)   | 36 (31.0)<br>/20 (37.0)              | 0/2 (3.7)          | 58 (50.0)/2<br>7 (50.0)  | 58<br>( 50.0)/25<br>(46.3) | BEV+IRI/TMZ                                                                      |
| Mark R.Gilbert<br>2016                | /                         | /                                    | /                  | /                        | /                          | Bevacizumab/<br>Placebo                                                          |
| Clara Chen<br>2014                    | 30 (53) /45 (57) /15 (65) | 57/79/23<br>27 (47) /34 (43) /8 (35) | 34 (60) /4<br>(61) | 20 (35) /33 (42) /9 (39) | 3 (5) /2 (2) /<br>0 (0)    | Bevacizumab<br>monotherapy<br>/Becavizumab<br>combination<br>/Nonbecavizu<br>mab |
| Hualong Li <sup>2020</sup>            | 19/18                     | 12/13                                | /                  | /                        | /                          | TMZ+BEV/TMZ                                                                      |
| Zhixian Zhang<br>2018                 | 22                        | 18                                   | /                  | 18                       | 22                         | BEV+TMZ/<br>Gamma knife<br>+TMZ/                                                 |
| Jiaqi Wang <sup>2013</sup>            | 16/14                     | 11/13                                | /                  | /                        | /                          | TMZ+BEV/TMZ                                                                      |
| Albert Lai <sup>2010</sup>            | 31/40                     | 39/70                                | 2/23               | 40/40                    | 28/47                      | RT+TMZ+Bv/UC<br>LA/KPLA<br>Control<br>RT/TMZ                                     |
| B.Chauffert <sup>2014</sup>           | 26/23                     | 34/37                                | /                  | /                        | /                          | BEV+IRI/TMZ<br>Z+RT                                                              |

### **Risk of bias assessment**

The results of the bias risk assessment included in the study are shown in figure 2.

### **Meta-analysis results**

#### **Progression-free survival**

Six studies<sup>10,12-14,18-19</sup> reported median progression-free survival (BEV group, n=1160) and Non-BEV group (n=1027). There was no significant difference in the heterogeneity test ( $I^2=43% < 50%$ ), so the fixed effect model was used for data analysis. Results suggested that the median progression-free survival of gliomas treated with BEV was significantly longer than that of malignant gliomas treated with Non-BEV (HR=0.71, 95%CI, 0.65 to 0.79,  $P < 0.00001$ ), As shown in figure 3.

Ten studies<sup>10-19</sup> compared PFS ratios at different follow-up between the BEV group and the Non-BEV group. There was a significant difference in the total heterogeneity test ( $I^2=71% > 50%$ ), so the random effect model was used. Through the results found it was found that the PFS in the BEV group was higher than that in the Non-BEV group at 6 months (3.31, 95%CI 2.74 to 4.00,  $p < 0.00001$ ), 12 months (2.05, 95%CI 1.70 to 2.49,  $p < 0.00001$ ) and 18 months (1.31, 95%CI 1.02 to 1.69,  $p = 0.03$ ). But at 24 months (0.83, 95%CI 0.50 to 1.37,  $p = 0.47$ ),  $P > 0.05$ , so there was no significant statistical difference between the two groups. At 30 months (0.62, 95%CI 0.39 to 0.97,  $p = 0.04$ ),  $0.61 < 1$ , the diamond pattern falls on the group that supports Non-BEV group, so the PFS of the BEV group was lower than that of the Non-BEV group, as shown in figure 4.

#### **Overall survival time**

Six studies<sup>10,12-14,18-19</sup> reported the median overall survival time, and there was a significant difference in the total heterogeneity test ( $I^2=72% > 50%$ ), so the random effect model was used. Results suggesting that there was no significant difference in median overall survival time between the BEV group and Non-BEV group (HR=0.93, 95%CI, 0.75 to 1.16,  $P = 0.54$ ), as shown in figure 5.

Six studies<sup>10,12-14,18-19</sup> compared OS ratios at different follow-up between the BEV group and the Non-BEV group. there was no significant difference in the heterogeneity test ( $I^2=38% < 50%$ ), so the fixed effect model was used for data analysis. Through the results found it was found that the OS in the BEV group was higher than that in the Non-BEV group at 6 months (1.41; 95%CI, 1.07-1.84;  $P = 0.01$ ), 12 months (1.31; 95%CI, 1.09-1.58;  $P = 0.005$ ). But at 18 months (0.95; 95%CI, 0.79-1.14;  $P = 0.58$ ), 24 months (1.10; 95%CI, 0.89-1.35;  $P = 0.39$ ), and 30 months (0.90; 95%CI, 0.69-1.18;  $P = 0.44$ ),  $P > 0.05$ , so there was no significant statistical difference between the two groups, as shown in figure 6.

### **Adverse reaction**

As shown in figure7, there were six studies<sup>10-11,13-15</sup> that compared adverse reactions between the BEV group and the Non-BEV group. There was a significant difference in the total heterogeneity test ( $I^2=58\%>50\%$ ), and the random effect model was used. The results showed the combined OR values of hypertension, hemorrhage, cerebral hemorrhage, albuminuria, and thromboembolism as follows: hypertension (4.94, 95%CI 3.60 to 6.78,  $P<0.00001$ ), hemorrhage (2.62, 95%CI 1.96 to 3.49,  $P<0.00001$ ), cerebral hemorrhage (2.06, 95%CI 0.96 to 4.40,  $P=0.05$ ), proteinuria (4.02, 95%CI 2.19 to 7.36,  $P<0.00001$ ) and thromboembolism (1.73, 95%CI 0.93 to 3.23,  $P=0.09$ ).Through the results found it was found that the adverse reactions in the BEV group was higher than that in the Non-BEV group .

### **Sensitivity analysis**

The sensitivity test was used to evaluate the stability of OS, PFS, and adverse reactions in the included literature, which showed that all values remained in the confidence interval on both sides after one by one elimination. Hence, it can be concluded that all the included literature is stable, as shown in figures 8,9.

### **Publication bias**

As shown in figures 10, the funnel chart was mainly concentrated at the top. Moreover, the symmetry was also proper, so it was concluded that the possibility of publication bias was small.

### **DISCUSSION**

According to histopathological and clinical features, gliomas are divided into astrocytoma, oligodendroglioma, oligodendroglioma and ependymoma, which are the most common malignant tumors derived from neuroepithelium. Although the technical level of surgery, radiotherapy and chemotherapy<sup>20</sup> in the treatment of glioma has been greatly improved, but the recurrence rate and mortality rate are still high, so there is an urgent need for a new treatment. Glioma affects the body through a variety of pathophysiological processes, in which angiogenesis plays an important role in the occurrence and development of glioma, so blocking angiogenesis has become a new direction of treatment. Bevacizumab is an anti-(VEGF) antibody against vascular endothelial growth factor<sup>21</sup>, which acts mainly by competing against VEGF, and binding to VEGFR on the target cell membrane. Pope<sup>22</sup> and other studies have shown that the high surface of VEGF affects blood vessel density and tumor grade. Some studies have shown that Ang2/Tie2<sup>23,24</sup> and STAT3<sup>25</sup> are two important signal pathways in anti-angiogenic therapy, which play a good role in inhibiting peritumoral edema and the increase of neurological symptoms. In order to better understand the advantages and

1  
2  
3  
4 disadvantages of BEV on glioma, this study has a better understanding of the  
5 efficacy and safety of BEV through systematic review.  
6

7 The results of our study showed that the PFS of BEV group was higher than  
8 that of Non-BEV group during the follow-up period of < 18 months, but when the  
9 follow-up time was 30 months, the PFS of BEV group was lower than that of  
10 Non-BEV; meanwhile, It was found that the OS in the BEV group was higher than  
11 that in the Non-BEV group at 6 months, 12 months, but after 12 months, there was  
12 no statistically significant difference between the BEV group and the non-BEV  
13 group. The study of Li YD<sup>26</sup> showed that the progression-free survival time at 24  
14 months and 36 months in the bevacizumab group was lower than that in the  
15 non-bevacizumab group; The results of Liao KL<sup>27</sup> showed that a higher incidence of  
16 PFS could be obtained by adding BEV to newly diagnosed GB, and this combined  
17 treatment did not improve OS. The AVAglio<sup>28</sup> trial showed that patients treated with  
18 bevacizumab had significant advantages in PFS (6.2 months vs. 10.6 months) and  
19 maintenance of life quality, but showed no advantages in OS (16.8 months vs. 16.7  
20 months). 2.2% of patients treated with bevacizumab confirmed false progression,  
21 compared with 9.3% of patients treated with non-bevacizumab. Vredenburgh<sup>29</sup>  
22 found in a single-group clinical phase 2 experimental study that the median PFS of  
23 bevacizumab combined with temozolomide and radiotherapy reached nearly twice  
24 the standard of 3-14 months, however the overall survival was not significant  
25 improvement. Chinot<sup>30</sup> and Gilbert<sup>31</sup> conducted phase 3 clinical trials with a placebo  
26 control group, the results showed that PFS increased by 40%-71% compared with  
27 the control group. Special related research on OS, Brandes<sup>32</sup> and Wick<sup>33</sup> also found  
28 that BEV failed to improve OS of patients with glioma in a randomized study  
29 analyzing bevacizumab. From the above research, BEV can improve the PFS of  
30 glioma patients within 18 months, but the PFS of patients may be reduced after 30  
31 months. It has no obvious significance to improve OS.  
32  
33  
34  
35  
36  
37  
38  
39  
40  
41  
42  
43  
44

45 This study showed that after the application of BEV, there were five common  
46 adverse reactions: hypertension, hemorrhage, cerebral hemorrhage, albuminuria  
47 and thromboembolism. A phase II trial of Japanese<sup>34</sup> showed that the most common  
48 side effects were albuminuria, hypertension, hemorrhage, fever and epilepsy.  
49 Studies<sup>35</sup> showed that the incidence of adverse reactions above grade 3 was 27.1%  
50 to 46.4%, the most common events were thromboembolism, hypertension, epilepsy,  
51 fatigue and intestinal perforation. Zhang Li<sup>36</sup> searched 20 articles about adverse  
52 reactions caused by BEV, and found that the main adverse reactions were  
53 cardiovascular and hematological diseases. Norden<sup>37</sup> evaluated 64 glioma patients  
54 who received BEV anticoagulant therapy and 64 glioma patients who did not  
55  
56  
57  
58  
59  
60

1  
2  
3  
4 receive anticoagulant therapy, The results showed that the incidence of intracranial  
5 hemorrhage and other bleeding in patients treated with anticoagulants was  
6 significantly higher than that in patients with BEV alone, but the incidence of severe  
7 intracranial hemorrhage was within an acceptable range. Therefore, when using  
8 bevacizumab clinically, it is necessary to closely observe drug adverse reactions,  
9 monitor blood pressure, coagulation function and other indicators, and deal with  
10 symptoms in time.

11  
12  
13  
14 From the above research results, it can be concluded that long-term use of  
15 BEV does not increase the patient's PFS, BEV can improve the PFS of glioma  
16 patients within 18 months, but the PFS of patients may be reduced after 30 months.  
17 Nagham Kaka found<sup>38</sup> that BEV could have a role in the treatment of particular  
18 subgroups of patients with newly diagnosed GBM. Several studies<sup>39,40</sup> have found  
19 that the median PFS of patients with methylation is longer than that of MGMT  
20 unmethylated tumors treated with RT and TMZ combined with BEV. Sandmann and  
21 colleagues<sup>41</sup> found that BEV combined with standard TMZ and RT can improve the  
22 survival rate of neurotumors, while poorly differentiated mesenchymal tumors may  
23 make tumors resistant to BEV over time. Adilijiang and Colleagues<sup>42</sup> found that  
24 treatment with BEV and TMZ results in the upregulation of certain  
25 microenvironment related genes in IDH1 mutant tumors in vitro, specifically those  
26 involving immune response and extracellular matrix organization. Therefore, The  
27 question of whether the limitation of BEV in the treatment of gliomas is due to fixed  
28 subsets deserves constant attention.

29  
30  
31  
32  
33  
34  
35  
36  
37 Studies have shown<sup>43,44</sup> that antiangiogenic therapy can lead to a transition  
38 of glioma to a more aggressive phenotype. In retrospective analysis<sup>45,46</sup> a trend  
39 toward enhanced infiltrative disease was seen in bevacizumab-treated glioma  
40 patients suggesting that enhanced tumor inhibition may be a consequence of  
41 VEGF signaling blockade. Shiao-Pei Weathers<sup>47</sup> shows that determining the best  
42 biological dose and the subgroup of patients most likely to obtain long-lasting  
43 benefits can improve the durability of bevacizumab. Victor A Levin<sup>48</sup> found  
44 treatment for recurrent GBM with BEV appears to improve survival at a dose lower  
45 than that in the FDA drug insert. Study<sup>49</sup> suggest that the higher dosage of BEV  
46 utilized may have impacted survival benefits. Animal models<sup>50</sup> also suggest that  
47 higher dose of anti-VEGF treatment, resulting in more hypoxia, may increase tumor  
48 aggressiveness. Ryota Tamura<sup>51</sup> found that high doses and long-term use of  
49 anti-VEGF/VEGFR may lead to hypoxia. Shiao-Pei Weathers<sup>47</sup> proposed in tumors  
50 where excessive vascular pruning takes place, hypoxia exacerbated by  
51 antiangiogenic therapy is likely responsible for initiating a cascade of events. As  
52  
53  
54  
55  
56  
57  
58  
59  
60

1  
2  
3  
4 mentioned above, there are many possible reasons for the limited efficacy of  
5 antiangiogenic therapy. But The lack of a long-lasting response to current  
6 antiangiogenic treatment underscores the need for a better understanding of how to  
7 use antiangiogenic therapy to optimize radiation and chemotherapy treatments.  
8  
9

## 10 **CONCLUSIONS**

11 The evidence suggests that BEV can significantly prolong the PFS of patients  
12 with glioma within 18 months and shorten the PFS of patients after 30 months. This  
13 limitation may be related to the subgroup of patients, the change of recurrence  
14 mode, the optimal dose of drug, the increase of hypoxia, the enhancement of  
15 invasiveness and so on. BEV treatment has no obvious meaning in improving OS,  
16 and it has some side effects, which are acceptable, but we still need to pay close  
17 attention to it and take active measures to reduce the side effects. Therefore, it is  
18 necessary to carry out more samples and higher quality large-scale research in the  
19 future.  
20  
21  
22  
23  
24

### 25 **Declaration:**

26 **Contributors** WH、 FXX and ZXP contributed to conception and design. WK、 MST  
27 and YYF contributed to data acquisition or analysis and interpretation of data. WH、  
28 FXX、 ZXP、 WK、 MST and YYF were involved in drafting the manuscript or revising  
29 it critically for important intellectual content. All authors have given final approval of  
30 the version to be published.  
31  
32  
33

34 **Funding** This work was supported by Affiliated Hospital of Shaanxi University of  
35 Traditional Chinese Medicine, reward/grant number is 2020-ZXY-007.

36 **Ethics Approval** This study belongs to data research and is not applicable to  
37 ethical review.  
38  
39

40 **Competing interests** None declared.  
41

42 **Patient and Public Involvement** No patient involved.  
43

44 **Provenance and peer review** Not commissioned; externally peer reviewed.  
45

46 **Data sharing** All data relevant to the study are included in the article or uploaded  
47 as supplementary information.  
48  
49

50 All the illustrations are as follows:

51 Figure 1: document screening process and results

52 PubMed (n=259), The Cochrane Library (n=153), EMBASE (n=155), CNKI (n=118),  
53 CBM (n=358), WanFang (n=65).  
54

55 Figure 2: bias risk assessment form  
56

57 Figure 3: HR of median PFS in BEV group and Non-BEV group in the treatment of  
58 glioma  
59  
60

1  
2  
3  
4 Fig 4:OR of PFS at each follow-up time in BEV group and Non-BEV group in the  
5 treatment of glioma

6  
7 Figure 5:HR of median OS in BEV group and Non-BEV group in the treatment of  
8 glioma

9  
10 Figure 6: OR of OS at each follow-up time in the treatment of glioma in the BEV  
11 group and Non-BEV group

12  
13 Figure 7: OR of adverse reactions in the treatment of glioma in the BEV group and  
14 Non-BEV group

15  
16 Figure 8:A: the sensitivity analysis of PFS6 ;B: the sensitivity analysis of PFS12;  
17 C:the sensitivity analysis of PFS18;D:the sensitivity analysis of PFS24;E:the  
18 sensitivity analysis of PFS30

19  
20 Figure 9:A: the sensitivity analysis of OS6 ;B: the sensitivity analysis of OS12;  
21 C:the sensitivity analysis of OS18;D:the sensitivity analysis of OS24;E:the  
22 sensitivity analysis of OS30

23  
24 Figure 10:A: funnel chart of PFS at each follow-up time;B: funnel chart of OS at  
25 each follow-up time

## 26 27 28 29 30 **REFERENCES**

31 1 Brem S,Tsanaclis AM,Gately S,et al.Immunolocalization of basic fibroblast growth  
32 factor to the microvasculature of human brain tumors. *Cancer* 1992; 70: 2673-80.

33 2 Xia S,Lal B,Tung B,et al.Tumor microenvironment tenascin-C promotes  
34 glioblastoma invasion and negatively regulates tumor proliferation.*Neuro Oncol*  
35 2015;18:507 -517.

36 3 Stupp R,Pavlidis N,Jelic S,et al.ESMO Minimum Clinical Recommendations for  
37 diagnosis, treatment and follow-up of malignant glioma. *Ann Oncol* 2005; 16 Suppl  
38 1:i64-5.

39 4 Higgins JPT, Altman DG, Gøtzsche PC, et al. The Cochrane Collaboration' s tool  
40 for assessing risk of bias in randomised trials. *BMJ* 2011; 343:d5928.

41 5 Sweet JA, Feinberg ML, Sherman JH. The role of avastin in the management  
42 of recurrent glioblastoma. *Neurosurg Clin N Am* 2012;23:331-341.

43 6 Cohen MH , Shen YL , Keegan P , et al . FDA drug approval summary:  
44 bevacizumab (Avastin) as treatment of recurrent glioblastoma  
45 multiforme.*Oncologist* 2009;14:1131-1138.

46 7 Kreisl TN, Kim L, Moore K, et al. Phase II trial of single-agent bevacizumab  
47 followed by bevacizumab plus irinotecan at tumor progression in recurrent  
48 glioblastoma. *J Clin Oncol* 2009; 27:740 - 5.



- 1  
2  
3  
4 8 Friedman HS, Prados MD, Wen PY, Mikkelsen T, Schiff D, Abrey LE, et al.  
5 Bevacizumab alone and in combination with irinotecan in recurrent glioblastoma. *J*  
6 *Clin Oncol* 2009; 27:4733 – 40.  
7  
8 9 Gs HJP. Cochrane handbook for systematic reviews of interventions version 5.1.0  
9 (updated March 2011). *Naunyn-Schmiedebergs Archiv für Experimentelle*  
10 *Pathologie und Pharmakologie* 2014;5:S38.  
11  
12 10 Olivier L. Chinot, M.D., Wolfgang Wick, M.D., Warren Mason, et al.  
13 Bevacizumab plus Radiotherapy-Temozolomide for Newly Diagnosed Glioblastoma.  
14 *The New England Journal of Medicine* 2014; 370:709-722.  
15  
16 11 Zhao Qianru. Efficacy and safety of bevacizumab combined with temozolomide  
17 in the treatment of recurrent malignant gliomas. Zhengzhou University, 2016.  
18  
19 12 Ulrich Herrlinger, Niklas Schäfer, Joachim P, et al. Bevacizumab Plus Irinotecan  
20 Versus Temozolomide in Newly Diagnosed O6-Methylguanine-DNA  
21 Methyltransferase Nonmethylated Glioblastoma: The Randomized GLARIUS Trial.  
22 *Journal of clinical oncology* 2015; 63:4691.  
23  
24 13 Mark R. Gilbert, James J. Dignam, Terri S. Armstrong, et al. A Randomized Trial  
25 of Bevacizumab for Newly Diagnosed Glioblastoma. *The New England Journal of*  
26 *Medicine* 2014;370:699-708.  
27  
28 14 Clara Chen,rliene Ravelo,Elaine Yu,et al.Clinical outcomes with  
29 bevacizumab-containing and non-bevacizumab - containing regimens in patients  
30 with recurrent glioblastoma from US community practices.CLINICAL STUDY  
31 2015;DOI 10.1007/s11060-015-1752-y.  
32  
33 15 Li Hualong, Qiang Ming, Huang Xiaoqin, et al. Efficacy of bevacizumab  
34 combined with temozolomide in the treatment of malignant recurrent gliomas. *Anhui*  
35 *Medicine*,2020;41:66-68.  
36  
37 16 Zhang Zhixian, Gu Hou, Lin Jian, et al.Clinical efficacy of gamma knife  
38 combined with bevacizumab in the treatment of postoperative malignant gliomas.  
39 *Journal of Kunming Medical University* 2018;39:33-37.  
40  
41 17 Wang Jiaqi, Liang Yong, Ouyang Zheng, et al. Clinical analysis of bevacizumab  
42 combined with temozolomide in the treatment of glioblastoma. *Oncology Pharmacy*  
43 2013;3:274-277.  
44  
45 18 Albert Lai,Anh Tran,Phioanh L,et al.Phase II Study of Bevacizumab Plus  
46 Temozolomide During and After Radiation Therapy for Patients With Newly  
47 Diagnosed Glioblastoma Multiforme.*JOURNAL OF CLINICAL ONCOLOGY*  
48 2010;30:2709.  
49  
50 19 Chauffert B,Feuvret L,Bonnetain F, et al. Randomized phase II trial of irinotecan  
51 and bevacizumab as neo-adjuvant and adjuvant to temozolomide-based  
52  
53  
54  
55  
56  
57  
58  
59  
60

1  
2  
3  
4 chemoradiation compared with temozolomide-chemoradiation for unresectable  
5 glioblastoma: final results of the TEMAVIR study from ANOCEF. *Annals of*  
6 *Oncology Official Journal of the European Society for Medical Oncology*  
7 2014;25:1442.

8  
9  
10 20 Lu Yuntao, Qi Songtao, Ouyanghui, et al. Surgical and therapeutic strategies for  
11 recurrent malignant gliomas in refractory sites. *Chinese Journal of Modern*  
12 *Neurological Diseases* 2012;12 (6): 682-690.

13  
14 21 Cheng Haixia, Wang Yin. Hair cell astrocytoma with vascular central  
15 arrangement: case report and literature review. *Chinese Journal of Modern*  
16 *Neurology*. 2013;13:342-348.

17  
18  
19 22 Pope WB, Xia Q, Paton VE, et al. Patterns of progression in patients with recurrent  
20 glioblastoma treated with bevacizumab. *Neurology* 2011;76:432-437.

21  
22 23 Park JS, Kim IK, Han S, et al. Normalization of tumor vessels by Tie2 activation  
23 and Ang2 inhibition enhances drug delivery and produces a favorable tumor  
24 microenvironment. *Cancer Cell* 2016;30:953—967.

25  
26 24 Labussiare M, Cheneau C, Prahst C, et al. Angiopoietin-2 may be involved in the  
27 resistance to bevacizumab in recurrent glioblastoma. *Cancer Invest* 2016 ;  
28 34:39—44.

29  
30 25 Groot J, Liang J, Kong LY, et al. Modulating antiangiogenic resistance by  
31 inhibiting the signal transducer and activator of transcription 3 pathway in  
32 glioblastoma. *Oncotarget* 2012;3(9):1036-1048.

33  
34 26 Li Y, Hou M, Lu G, et al. The Prognosis of Anti-Angiogenesis Treatments  
35 Combined with Standard Therapy for Newly Diagnosed Glioblastoma: A  
36 Meta-Analysis of Randomized Controlled Trials. *Plos One* 2016,11:e0168264.

37  
38 27 Liao KL, Huang S, Wu YP. The prognosis for patients with newly diagnosed  
39 glioblastoma receiving bevacizumab combination therapy: a meta-analysis.  
40 *OncoTargets and therapy* 2018;11:3513-3520.

41  
42 28 Chinot O, Cloughesy T, Henriksson R, et al. Efficacy and safety of bevacizumab  
43 (Bv) plus standard combination temozolomide (T) and radiotherapy (RT) in newly  
44 diagnosed glioblastoma: final results from a AVA glio. *Eur J Cancer* 2013; 49(suppl  
45 2):S774-5.

46  
47 29 Vredenburgh JJ, Desjardins A, Kirkpatrick JP, et al. Addition of bevacizumab to  
48 standard radiation therapy and daily temozolomide is associated with minimal  
49 toxicity in newly diagnosed glioblastoma multiforme. *Int J Radiat Oncol Biol Phys*  
50 2012;82:58-66.

51  
52 30 Chinot OL, Wick W, Mason W, et al. Bevacizumab plus  
53 radiotherapy-temozolomide for newly diagnosed glioblastoma. *N Engl J Med*  
54 2014;370:709 - 22.

- 1  
2  
3  
4 31 Gilbert MR, Dignam JJ, Armstrong TS, et al. A randomized trial of bevacizumab  
5 for newly diagnosed glioblastoma. *N Engl J Med* 2014;370:699 – 708.  
6  
7 32 Brandes, A.A.,Finocchiaro, G.,Zagonel, V.,et al.Final results from the  
8 randomized phase II trial average (ML25739) with bevacizumab or fotemustine in  
9 recurrent GBM. *Neuro-Oncol* 2014;16:v8 – v22.  
10  
11 33 Wick, W.,Brandes, A.A.,Gorlia, T.,et al.Phase III trial exploring the combination  
12 of bevacizumab and lomustine in patients with first recurrence of a glioblastoma:  
13 the EORTC 26101 trial.*Neuro-Oncol* 2015;17:v1.  
14  
15 34 Friedman HS, Prados MD, Wen PY, et al. Bevacizumab alone and in  
16 combination with irinotecan in recurrent glioblastoma. *J Clin Oncol.*2009;27:4733 –  
17 40.  
18  
19 35 Nagane M,Nishikawa R,Narita Y,et al.Phase II study of single-agent  
20 bevacizumab in Japanese patients with recurrent malignant glioma.*Jpn J Clin*  
21 *Oncol* 2012;42:887 – 95.  
22  
23 36 Zhang Li. Statistical analysis of adverse reactions caused by bevacizumab.  
24 *Clinical Medical Engineering* 2012;19:129-130.  
25  
26 37 Norden AD,Bartolomeo J,Tanaka S,et al.Safety of concurrent bevacizumab  
27 therapy and anticoagulation in glioma patients. *J Neurooncol* 2011;106:121-125.  
28  
29 38 Nagham Kaka,Karim Hafazalla,Haidar Samawi,et al.Progression-Free but No  
30 Overall Survival Benefit for Adult Patients with Bevacizumab Therapy for the  
31 Treatment of Newly Diagnosed Glioblastoma:A Systematic Review and  
32 Meta-Analysis.*Cancers* 2019;11:1723.  
33  
34 39 Chinot, O.L.;Wick, W.;Mason, W.;et al.Bevacizumab plus  
35 radiotherapy-temozolomide for newly diagnosed glioblastoma.*New Engl. J. Med*  
36 2014;370:709 – 722.  
37  
38 40 Gilbert, M.R.;Dignam, J.J.;Armstrong, T.S.;et al.A randomized trial of  
39 bevacizumab for newly diagnosed glioblastoma. *New Engl.J.Med* 2014;370:699 –  
40 708.  
41  
42 41 Phillips, H.S.;Kharbanda, S.;Chen, R.;et al. Molecular subclasses of high-grade  
43 glioma predict prognosis, delineate a pattern of disease progression, and resemble  
44 stages in neurogenesis.*Cancer Cell* 2006;9:157 – 173.  
45  
46 42 Adilijiang, A.;Hirano, M.;Okuno, Y.;et al.Next generation sequencing-based  
47 transcriptome predicts bevacizumab efficacy in combination with temozolomide in  
48 glioblastoma. *Molecules* 2019;24:3046.  
49  
50 43 Piao Y , Liang J, Holmes L, et al. Acquired resistance to anti-VEGF therapy in  
51 glioblastoma is associated with a mesenchymal transi-tion.*Clin Cancer Res*  
52 2013;19:4392 – 403.  
53  
54  
55  
56  
57  
58  
59  
60

1  
2  
3  
4 44 Lu KV , Chang JP , Parachoniak CA, et al. VEGF inhibits tumor cell invasion and  
5 mesenchymal transition through a MET/VEGFR2 complex.Cancer Cell  
6 2012;22:21 - 35.  
7

8 45 Norden A,Young G,Setayesh K,et al.Bevacizumab for recurrent malignant  
9 gliomas: efficacy, toxicity, and patterns of recurrence.Neurology 2008;70:779 - 87.  
10

11 46 Soda Y,Myskiw C,Rommel A, Verma I. Mechanisms of neovas-  
12 cularization and  
13 resistance to anti-angiogenic therapies in glioblas-toma multiforme. J Mol Med  
14 (Berl) 2013;91:439 - 48.  
15

16 47 Shiao-Pei Weathers,John de Groot.Resistance to Antiangiogenic Therapy.Curr  
17 Neurol Neurosci Rep 2014;14:443.  
18

19 48 Victor A.Levin,Nancy D,et al.Mendelssohn,James Chan.Impact of bevacizumab  
20 administered dose on overall survival of patients with progressive glioblastoma.J  
21 Neurooncol 2015;122:145-50.  
22

23 49 Lorgis V,Maura G,Coppa G,et al.Relation between bevacizumab dose intensity  
24 and high-grade glioma survival: a retrospective study in two large cohorts.J  
25 NeuroOncol 2012,107:351-358.  
26

27 50 Keunen O,Johansson M,Oudin A,et al.Anti-VEGF treatment reduces blood  
28 supply and increases tumor cell invasion in glioblastoma. Proc Natl Acad Sci USA  
29 Proc Natl Acad Sci U S A 2011;108:3749-54.  
30

31 51 Ryota Tamura,Toshihide Tanaka,Yasuharu Akasaki,et al.The role of vascular  
32 endothelial growth factor in the hypoxic and immunosuppressive tumor  
33 microenvironment: perspectives for therapeutic implications..Med Oncol 2019;37:2.  
34  
35  
36  
37  
38  
39  
40  
41  
42  
43  
44  
45  
46  
47  
48  
49  
50  
51  
52  
53  
54  
55  
56  
57  
58  
59  
60

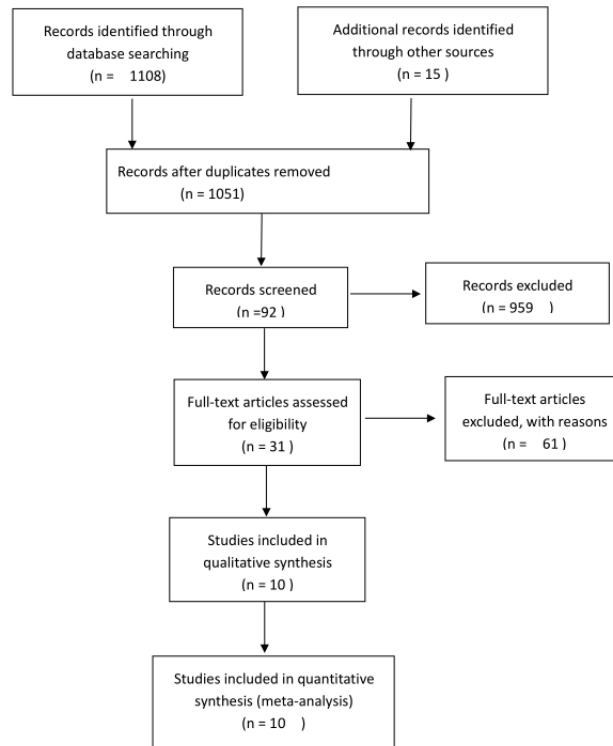

45 Figure 1: document screening process and results  
 46 PubMed (n=259), The Cochrane Library (n=153), Embase (n=155), CNKI (n=118), CBM (n=358), WanFang  
 47 (n=65).

48 168x237mm (120 x 120 DPI)

|                        |                                                           |   |   |   |   |   |   |
|------------------------|-----------------------------------------------------------|---|---|---|---|---|---|
| Albert Lai 2010        | ?                                                         | + | + | + | + | + | + |
| B. Chauffert 2014      | ?                                                         | ? | + | + | + | + | + |
| Clara Chen 2014        | ?                                                         | ? | + | ? | + | + | + |
| HuaLong Li 2013        | ?                                                         | ? | + | + | + | + | + |
| Jiaqi Wang 2013        | ?                                                         | ? | + | + | + | + | + |
| Mark R. Gilbert 2016   | ?                                                         | ? | + | + | + | + | + |
| Oliver L. Chintot 2014 | ?                                                         | ? | + | + | + | + | + |
| Qianru Zhao 2016       | ?                                                         | ? | + | + | + | + | + |
| Ulrich Herrlinger 2016 | ?                                                         | ? | + | + | + | + | + |
| ZhiXian Zhang 2018     | +                                                         | ? | ? | ? | + | + | + |
|                        | Random sequence generation (selection bias)               |   |   |   |   |   |   |
|                        | Allocation concealment (selection bias)                   |   |   |   |   |   |   |
|                        | Blinding of participants and personnel (performance bias) |   |   |   |   |   |   |
|                        | Blinding of outcome assessment (detection bias)           |   |   |   |   |   |   |
|                        | Incomplete outcome data (attrition bias)                  |   |   |   |   |   |   |
|                        | Selective reporting (reporting bias)                      |   |   |   |   |   |   |
|                        | Other bias                                                |   |   |   |   |   |   |

Figure 2: bias risk assessment form

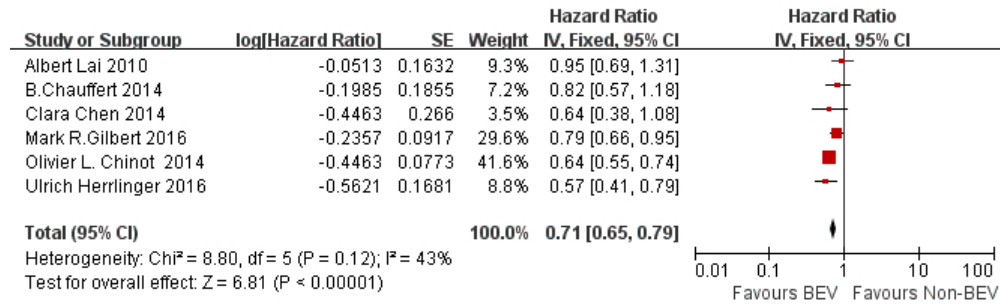

Figur 3:HR of median PFS in BEV group and Non-BEV group in the treatment of glioma

140x44mm (120 x 120 DPI)

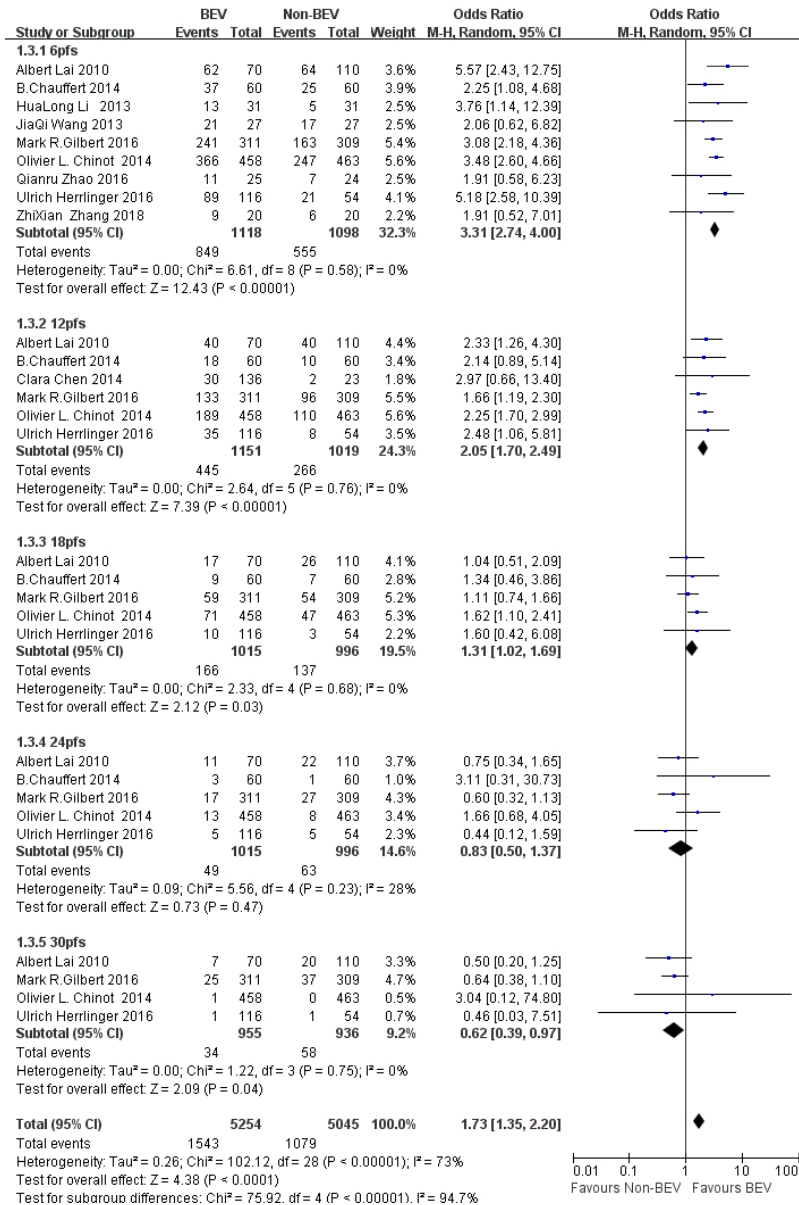

Figur 4:OR of PFS at each follow-up time in BEV group and Non-BEV group in the treatment of glioma

150x223mm (120 x 120 DPI)



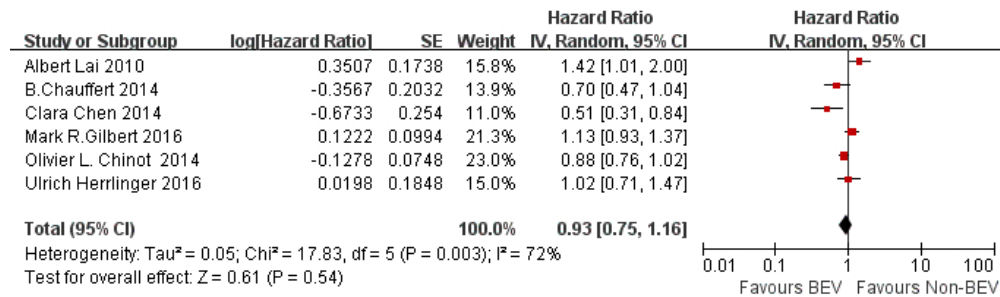

Figure 5:HR of median OS in BEV group and Non-BEV group in the treatment of glioma

144x44mm (120 x 120 DPI)

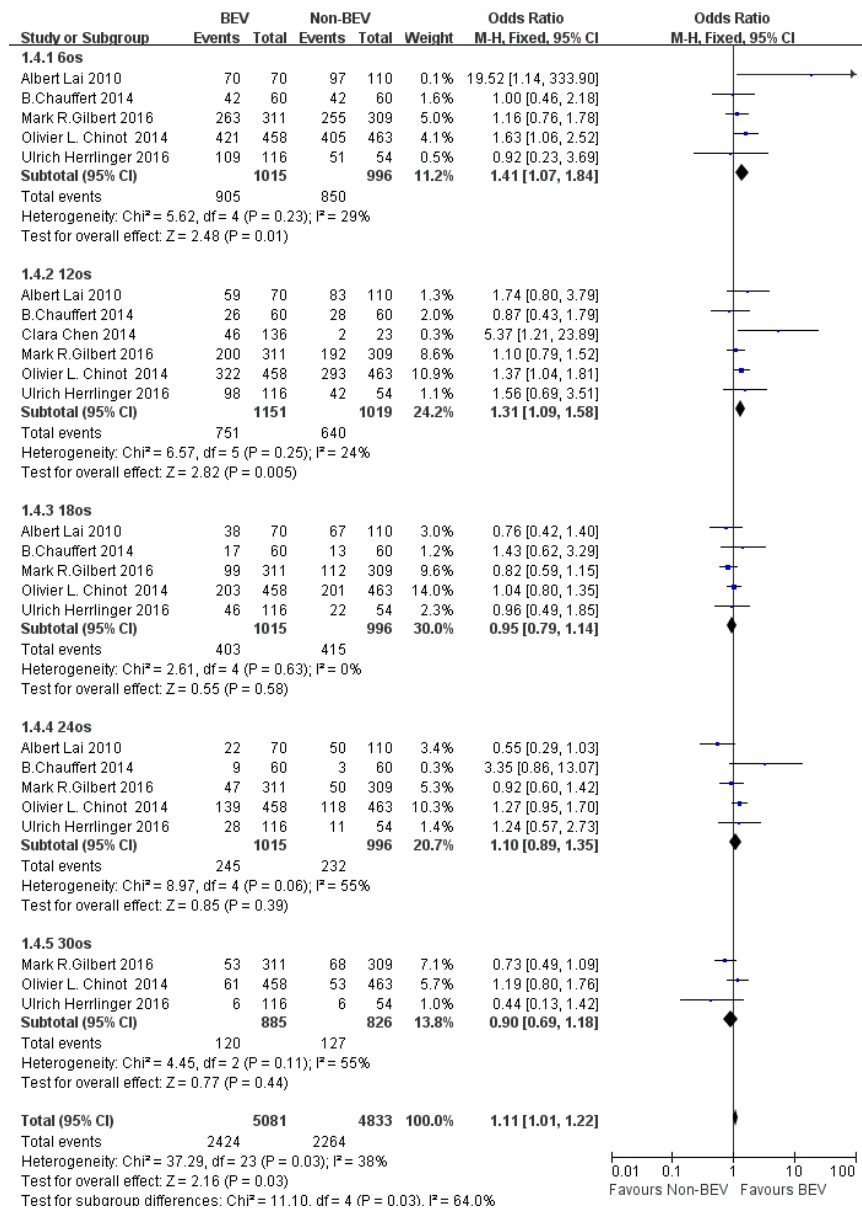

Figure 6: OR of OS at each follow-up time in the treatment of glioma in the BEV group and Non-BEV group

148x206mm (120 x 120 DPI)

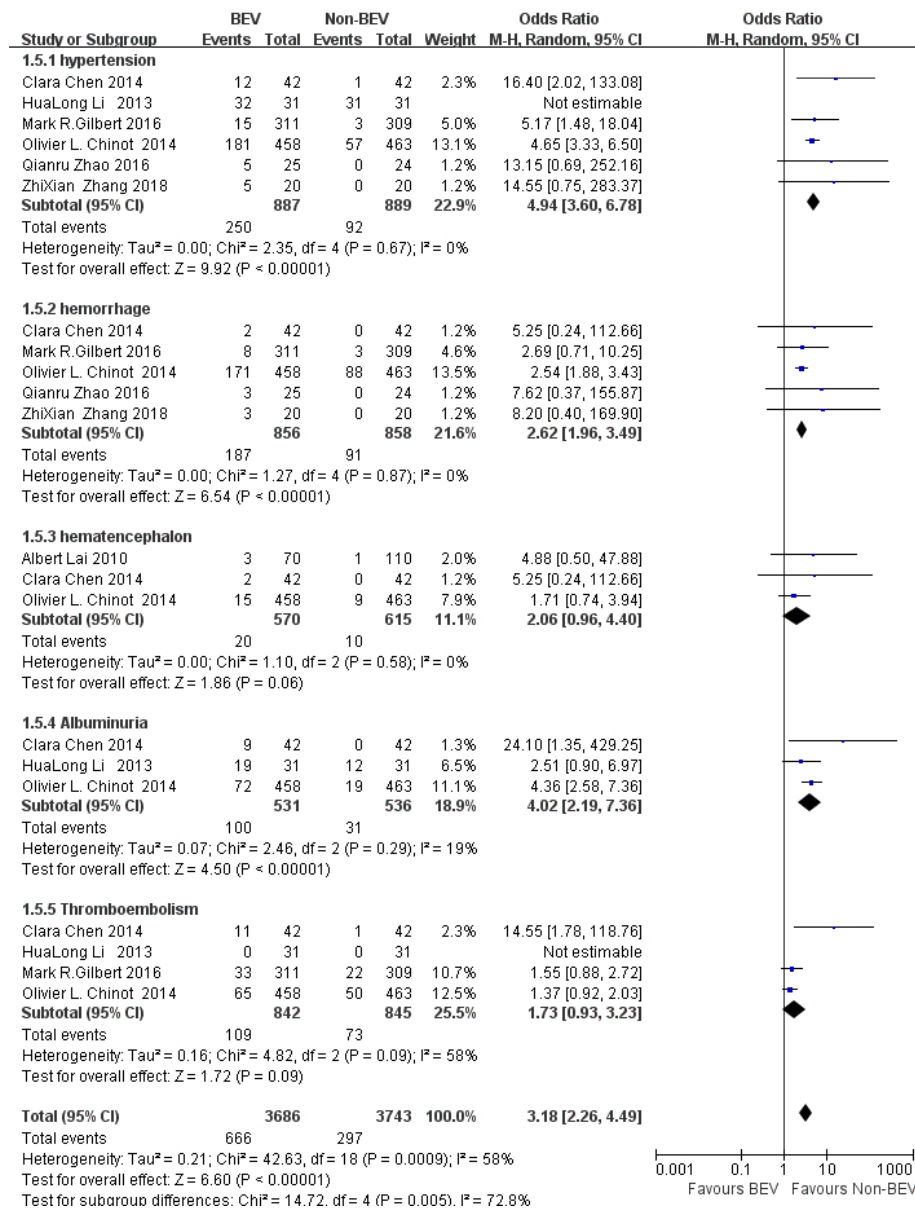

Figure 7: OR of adverse reactions in the treatment of glioma in the BEV group and Non-BEV group

150x196mm (120 x 120 DPI)

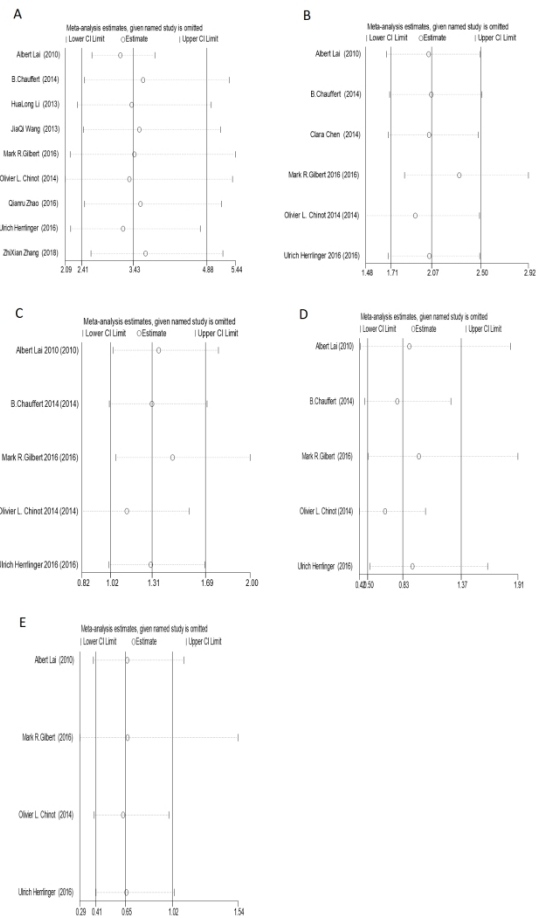

Figure 8:A: the sensitivity analysis of PFS6 ;B: the sensitivity analysis of PFS12; C:the sensitivity analysis of PFS18;D:the sensitivity analysis of PFS24;E:the sensitivity analysis of PFS30

209x296mm (288 x 288 DPI)

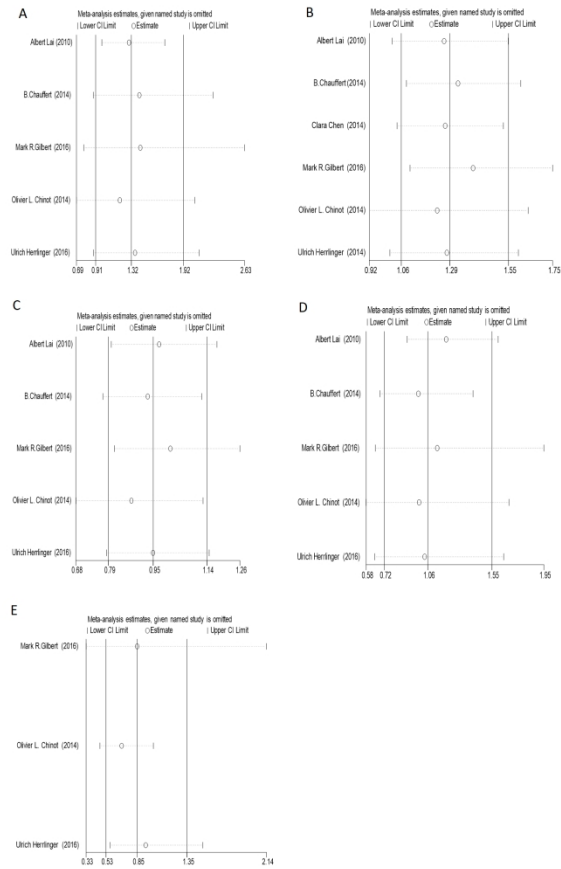

Figure 9:A: the sensitivity analysis of OS6 ;B: the sensitivity analysis of OS12; C:the sensitivity analysis of OS18;D:the sensitivity analysis of OS24;E:the sensitivity analysis of OS30

209x296mm (288 x 288 DPI)

1  
2  
3  
4  
5  
6  
7  
8  
9  
10  
11  
12  
13  
14  
15  
16  
17  
18  
19  
20  
21  
22  
23  
24  
25  
26  
27  
28  
29  
30  
31  
32  
33  
34  
35  
36  
37  
38  
39  
40  
41  
42  
43  
44  
45  
46  
47  
48  
49  
50  
51  
52  
53  
54  
55  
56  
57  
58  
59  
60

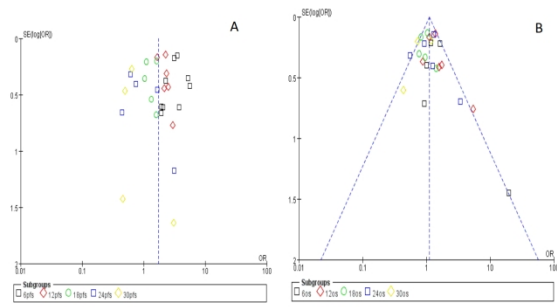

Figure 10:A: funnel chart of PFS at each follow-up time;B: funnel chart of OS at each follow-up time

209x296mm (288 x 288 DPI)

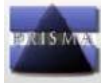

## PRISMA 2020 Checklist

| Section and Topic             | Item # | Checklist item                                                                                                                                                                                                                                                                                       | Location where item is reported |
|-------------------------------|--------|------------------------------------------------------------------------------------------------------------------------------------------------------------------------------------------------------------------------------------------------------------------------------------------------------|---------------------------------|
| <b>TITLE</b>                  |        |                                                                                                                                                                                                                                                                                                      |                                 |
| Title                         | 1      | Identify the report as a systematic review.                                                                                                                                                                                                                                                          | 1                               |
| <b>ABSTRACT</b>               |        |                                                                                                                                                                                                                                                                                                      |                                 |
| Abstract                      | 2      | See the PRISMA 2020 for Abstracts checklist.                                                                                                                                                                                                                                                         | 1                               |
| <b>INTRODUCTION</b>           |        |                                                                                                                                                                                                                                                                                                      |                                 |
| Rationale                     | 3      | Describe the rationale for the review in the context of existing knowledge.                                                                                                                                                                                                                          | 2                               |
| Objectives                    | 4      | Provide an explicit statement of the objective(s) or question(s) the review addresses.                                                                                                                                                                                                               | 2                               |
| <b>METHODS</b>                |        |                                                                                                                                                                                                                                                                                                      |                                 |
| Eligibility criteria          | 5      | Specify the inclusion and exclusion criteria for the review and how studies were grouped for the syntheses.                                                                                                                                                                                          | 3                               |
| Information sources           | 6      | Specify all databases, registers, websites, organisations, reference lists and other sources searched or consulted to identify studies. Specify the date when each source was last searched or consulted.                                                                                            | 3                               |
| Search strategy               | 7      | Present the full search strategies for all databases, registers and websites, including any filters and limits used.                                                                                                                                                                                 | 13-14                           |
| Selection process             | 8      | Specify the methods used to decide whether a study met the inclusion criteria of the review, including how many reviewers screened each record and each report retrieved, whether they worked independently, and if applicable, details of automation tools used in the process.                     | 3                               |
| Data collection process       | 9      | Specify the methods used to collect data from reports, including how many reviewers collected data from each report, whether they worked independently, any processes for obtaining or confirming data from study investigators, and if applicable, details of automation tools used in the process. | 4                               |
| Data items                    | 10a    | List and define all outcomes for which data were sought. Specify whether all results that were compatible with each outcome domain in each study were sought (e.g. for all measures, time points, analyses), and if not, the methods used to decide which results to collect.                        | 4                               |
|                               | 10b    | List and define all other variables for which data were sought (e.g. participant and intervention characteristics, funding sources). Describe any assumptions made about any missing or unclear information.                                                                                         | 9                               |
| Study risk of bias assessment | 11     | Specify the methods used to assess risk of bias in the included studies, including details of the tool(s) used, how many reviewers assessed each study and whether they worked independently, and if applicable, details of automation tools used in the process.                                    | 4                               |
| Effect measures               | 12     | Specify for each outcome the effect measure(s) (e.g. risk ratio, mean difference) used in the synthesis or presentation of results.                                                                                                                                                                  | 4                               |
| Synthesis methods             | 13a    | Describe the processes used to decide which studies were eligible for each synthesis (e.g. tabulating the study intervention characteristics and comparing against the planned groups for each synthesis (item #5)).                                                                                 | 3                               |
|                               | 13b    | Describe any methods required to prepare the data for presentation or synthesis, such as handling of missing summary statistics, or data conversions.                                                                                                                                                | 4                               |
|                               | 13c    | Describe any methods used to tabulate or visually display results of individual studies and syntheses.                                                                                                                                                                                               | 4                               |
|                               | 13d    | Describe any methods used to synthesize results and provide a rationale for the choice(s). If meta-analysis was performed, describe the model(s), method(s) to identify the presence and extent of statistical heterogeneity, and software package(s) used.                                          | 4                               |
|                               | 13e    | Describe any methods used to explore possible causes of heterogeneity among study results (e.g. subgroup analysis, meta-regression).                                                                                                                                                                 | 4-5                             |
|                               | 13f    | Describe any sensitivity analyses conducted to assess robustness of the synthesized results.                                                                                                                                                                                                         | 4-5                             |
| Reporting bias assessment     | 14     | Describe any methods used to assess risk of bias due to missing results in a synthesis (arising from reporting biases).                                                                                                                                                                              | 4                               |
| Certainty assessment          | 15     | Describe any methods used to assess certainty (or confidence) in the body of evidence for an outcome.                                                                                                                                                                                                | 4-5                             |

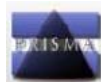

## PRISMA 2020 Checklist

| Section and Topic                              | Item # | Checklist item                                                                                                                                                                                                                                                                       | Location where item is reported |
|------------------------------------------------|--------|--------------------------------------------------------------------------------------------------------------------------------------------------------------------------------------------------------------------------------------------------------------------------------------|---------------------------------|
| <b>RESULTS</b>                                 |        |                                                                                                                                                                                                                                                                                      |                                 |
| Study selection                                | 16a    | Describe the results of the search and selection process, from the number of records identified in the search to the number of studies included in the review, ideally using a flow diagram.                                                                                         | 5                               |
|                                                | 16b    | Cite studies that might appear to meet the inclusion criteria, but which were excluded, and explain why they were excluded.                                                                                                                                                          | 5                               |
| Study characteristics                          | 17     | Cite each included study and present its characteristics.                                                                                                                                                                                                                            | 5                               |
| Risk of bias in studies                        | 18     | Present assessments of risk of bias for each included study.                                                                                                                                                                                                                         | 5                               |
| Results of individual studies                  | 19     | For all outcomes, present, for each study: (a) summary statistics for each group (where appropriate) and (b) an effect estimate and its precision (e.g. confidence/credible interval), ideally using structured tables or plots.                                                     | 5-6                             |
| Results of syntheses                           | 20a    | For each synthesis, briefly summarise the characteristics and risk of bias among contributing studies.                                                                                                                                                                               | 6                               |
|                                                | 20b    | Present results of all statistical syntheses conducted. If meta-analysis was done, present for each the summary estimate and its precision (e.g. confidence/credible interval) and measures of statistical heterogeneity. If comparing groups, describe the direction of the effect. | 6                               |
|                                                | 20c    | Present results of all investigations of possible causes of heterogeneity among study results.                                                                                                                                                                                       | 6                               |
|                                                | 20d    | Present results of all sensitivity analyses conducted to assess the robustness of the synthesized results.                                                                                                                                                                           | 6                               |
| Reporting biases                               | 21     | Present assessments of risk of bias due to missing results (arising from reporting biases) for each synthesis assessed.                                                                                                                                                              | 6                               |
| Certainty of evidence                          | 22     | Present assessments of certainty (or confidence) in the body of evidence for each outcome assessed.                                                                                                                                                                                  | 6                               |
| <b>DISCUSSION</b>                              |        |                                                                                                                                                                                                                                                                                      |                                 |
| Discussion                                     | 23a    | Provide a general interpretation of the results in the context of other evidence.                                                                                                                                                                                                    | 7-8                             |
|                                                | 23b    | Discuss any limitations of the evidence included in the review.                                                                                                                                                                                                                      | 7-8                             |
|                                                | 23c    | Discuss any limitations of the review processes used.                                                                                                                                                                                                                                | 7-8                             |
|                                                | 23d    | Discuss implications of the results for practice, policy, and future research.                                                                                                                                                                                                       | 8                               |
| <b>OTHER INFORMATION</b>                       |        |                                                                                                                                                                                                                                                                                      |                                 |
| Registration and protocol                      | 24a    | Provide registration information for the review, including register name and registration number, or state that the review was not registered.                                                                                                                                       | 9                               |
|                                                | 24b    | Indicate where the review protocol can be accessed, or state that a protocol was not prepared.                                                                                                                                                                                       | 9                               |
|                                                | 24c    | Describe and explain any amendments to information provided at registration or in the protocol.                                                                                                                                                                                      | 9                               |
| Support                                        | 25     | Describe sources of financial or non-financial support for the review, and the role of the funders or sponsors in the review.                                                                                                                                                        | 9                               |
| Competing interests                            | 26     | Declare any competing interests of review authors.                                                                                                                                                                                                                                   | 9                               |
| Availability of data, code and other materials | 27     | Report which of the following are publicly available and where they can be found: template data collection forms; data extracted from included studies; data used for all analyses; analytic code; any other materials used in the review.                                           | 9                               |

43

44 From: Page MJ, McKenzie JE, Bossuyt PM, Boutron I, Hoffmann TC, Mulrow CD, et al. The PRISMA 2020 statement: an updated guideline for reporting systematic reviews. BMJ 2021;372:n71. doi: 10.1136/bmj.n71

45

For peer review only - <http://bmjopen.bmj.com/site/about/guidelines.xhtml>

46

For more information, visit: <http://www.prisma-statement.org/>

47



# BMJ Open

## Efficacy and safety of bevacizumab in the treatment of adult gliomas: a systematic review and meta-analysis

|                                 |                                                                                                                                                                                                                                                                                                                                                                                                                                               |
|---------------------------------|-----------------------------------------------------------------------------------------------------------------------------------------------------------------------------------------------------------------------------------------------------------------------------------------------------------------------------------------------------------------------------------------------------------------------------------------------|
| Journal:                        | <i>BMJ Open</i>                                                                                                                                                                                                                                                                                                                                                                                                                               |
| Manuscript ID                   | bmjopen-2021-048975.R2                                                                                                                                                                                                                                                                                                                                                                                                                        |
| Article Type:                   | Original research                                                                                                                                                                                                                                                                                                                                                                                                                             |
| Date Submitted by the Author:   | 19-Aug-2021                                                                                                                                                                                                                                                                                                                                                                                                                                   |
| Complete List of Authors:       | Wang, huan; Xi'an Jiaotong University Medical College First Affiliated Hospital,<br>Guo, Jianxin; Xi'an Jiaotong University Medical College First Affiliated Hospital<br>Wang, Tianze; Xi'an Jiaotong University<br>wang, kai; Shaanxi University of Chinese Medicine<br>Wu, Zhuojun; Xi'an Jiaotong University Medical College First Affiliated Hospital<br>Sun, Tianze; Xi'an Jiaotong University Medical College First Affiliated Hospital |
| <b>Primary Subject Heading</b>: | Oncology                                                                                                                                                                                                                                                                                                                                                                                                                                      |
| Secondary Subject Heading:      | Patient-centred medicine                                                                                                                                                                                                                                                                                                                                                                                                                      |
| Keywords:                       | NEUROSURGERY, ONCOLOGY, Head & neck tumours < ONCOLOGY                                                                                                                                                                                                                                                                                                                                                                                        |
|                                 |                                                                                                                                                                                                                                                                                                                                                                                                                                               |

SCHOLARONE™  
Manuscripts



I, the Submitting Author has the right to grant and does grant on behalf of all authors of the Work (as defined in the below author licence), an exclusive licence and/or a non-exclusive licence for contributions from authors who are: i) UK Crown employees; ii) where BMJ has agreed a CC-BY licence shall apply, and/or iii) in accordance with the terms applicable for US Federal Government officers or employees acting as part of their official duties; on a worldwide, perpetual, irrevocable, royalty-free basis to BMJ Publishing Group Ltd ("BMJ") its licensees and where the relevant Journal is co-owned by BMJ to the co-owners of the Journal, to publish the Work in this journal and any other BMJ products and to exploit all rights, as set out in our [licence](#).

The Submitting Author accepts and understands that any supply made under these terms is made by BMJ to the Submitting Author unless you are acting as an employee on behalf of your employer or a postgraduate student of an affiliated institution which is paying any applicable article publishing charge ("APC") for Open Access articles. Where the Submitting Author wishes to make the Work available on an Open Access basis (and intends to pay the relevant APC), the terms of reuse of such Open Access shall be governed by a Creative Commons licence – details of these licences and which [Creative Commons](#) licence will apply to this Work are set out in our licence referred to above.

Other than as permitted in any relevant BMJ Author's Self Archiving Policies, I confirm this Work has not been accepted for publication elsewhere, is not being considered for publication elsewhere and does not duplicate material already published. I confirm all authors consent to publication of this Work and authorise the granting of this licence.

Efficacy and safety of bevacizumab in the treatment of adult gliomas: a systematic review and meta-analysis

Wang Huan<sup>1</sup> Guo Jianxin<sup>1</sup> Wang Tianze<sup>2</sup> Wang Kai<sup>3</sup> Wu Zhuojun<sup>1</sup>  
Sun Tianze<sup>1</sup>

1. The First Affiliated Hospital of Xi'an Jiaotong University, Xi'an, China, 710000
2. Xi'an Jiaotong University, Xi'an, China, 710000
3. Shaanxi University of Chinese Medicine, Xianyang, China, 712000

Correspondence to Guo Jianxin: gjx1665@126.com

Keywords : glioma, Bevacizumab, efficacy, safety, progression-free survival

Number of words: 3923

## ABSTRACT

**Objective** To assess the efficacy and safety of bevacizumab in patients with glioma.

**Design** Systematic review and meta-analysis.

**Participants** Adults aged 18 years and above, whose histology was confirmed to be malignant glioma.

**Primary and secondary outcome measures:** The main indicators included progression-free survival rate and overall survival rate, and the secondary indicators were adverse reactions.

**Results:** A total of 11 clinical center trials were included in this study for meta-analysis, including 2392 patients. The results of the meta-analysis showed that the median PFS rate of the BEV group was significantly higher than that of the Non-BEV group ( $P < 0.00001$ ). When comparing PFS between two groups, we found that the PFS in the BEV group was higher than that in the Non-BEV group at 6 months (OR 3.31, 95%CI 2.74 to 4.00,  $p < 0.00001$ ), 12 months (OR 2.05, 95%CI 1.70 to 2.49,  $p < 0.00001$ ) and 18 months (OR 1.31, 95%CI 1.02 to 1.69,  $p = 0.03$ ). But at 24 months (OR 0.83, 95%CI 0.50 to 1.37,  $p = 0.47$ ), there was no significant difference between the two groups. At 30 months (OR 0.62, 95%CI 0.39 to 0.97,  $p = 0.04$ ), the PFS of the BEV group was lower than that of the Non-BEV group. Moreover, The results showed that BEV had no significant effect on improving OS, but the adverse reaction in BEV group was significantly higher than that in non-BEV group.

**Conclusion:** The evidence suggests that BEV can significantly prolong the PFS of patients with glioma within 18 months and shorten the PFS of patients after 30 months. This limitation may be related to the subgroup of patients, the change of recurrence mode, the optimal dose of drug, the increase of hypoxia, the enhancement of invasiveness and so on. Therefore, it is necessary to carry out more samples and higher quality large-scale research in the future.

## Strengths and Limitations of this study

1. We used the Cochrane criteria to assess the risk of bias.
2. The heterogeneity was explored by sensitivity, sub-group.

3. the quality of included studies was largely moderate to high.
4. The preoperative symptoms and the scope and degree of surgical resection are not taken into account.

## INTRODUCTION

Brain glioma is the most common primary intracranial tumor, accounting for about 27% of central nervous system tumors and 80% of intracranial malignant tumors<sup>1</sup>. The median survival time reported with brain glioma is 14-16 months<sup>2</sup>. The Surgical intervention combined with radiotherapy and chemotherapy are often followed for treatment of such cases, but because of its high invasive nature, it often relapses in a short time with poor prognosis. The emergence of temozolomide has considerably delayed the development of glioma to some extent, but the survival rate and quality of life of patients are still very low. Therefore, looking for better drugs to prevent and delaying the postoperative recurrence of glioma have become the focus of current research. In recent years, more and more studies have shown that malignant glioma is the tumor with the highest degree of vascularization<sup>3</sup>. The nature of proliferation is characterized by obvious proliferative vascular lumen and with abnormal proliferation of neovascularization which participates in the construction of tumor microenvironment<sup>4</sup>. It is closely related to the growth, invasion, and metastasis of the tumor, and positively correlated with the extent of malignancy and prognosis of the tumor. Recently, the unique biological characteristics of gliomas indicated that angiogenic factors may play an important role in its treatment and have become the focus of research.

Humanized anti-vascular endothelial growth factor monoclonal antibody-bevacizumab<sup>5</sup>, as a representative drug of anti-angiogenic therapy, was approved for recurrent glioblastoma by FDA in 2009<sup>6</sup> and was listed in China in 2010 by CFDA. According to the radiological response rate, bevacizumab has been approved for recurrent glioblastoma in the United States and many other countries<sup>7,8</sup>. Although bevacizumab (BEV) has become an important part of HGG therapy, the safety and long-term efficacy of BEV are not clear. Therefore, we conducted a clinical meta-analysis to evaluate the safety and adverse reactions of BEV in patients with HGG, in order to provide a reference for clinical application.

## METHODS

This study was mainly based on the literature research, hence there is no need for ethical identification.

### Patient and Public Involvement

1  
2  
3  
4 No patients or members of the public were involved in the design or conduct of  
5 this study  
6  
7

### 8 **Search strategy**

9  
10 We collected all the clinical experimental studies of anti-angiogenic therapy in  
11 the treatment of gliomas, retrieved through a database search including PubMed,  
12 Embase, The Cochrane Library, WanFang, Chinese periodical full-text database (CNKI),  
13 and Chinese biomedical literature service system (CBM), the time span is from the  
14 establishment of the database to April 2020. The search strategy followed included  
15 a combination of subject words and free words, and the retrieval strategy was  
16 determined after several pre-searches. The main search words included: "glioma",  
17 "angiogenesis inhibitors", "vascular endothelial growth factors", "VEGF", and  
18 "clinical study". Additionally, we also manually searched the reference list of all  
19 articles on this topic to check and enhance the retrieval of other related publications.  
20 All search results are evaluated according to the (PRISMA) statement of "preferred  
21 reporting items for systematic review and meta-analysis".  
22  
23  
24  
25  
26  
27  
28  
29

### 30 **Selection criteria**

31 Studies were included if they fulfilled the following criteria: (1) Study subjects:  
32 the participants were adults aged 18 years and above, whose histology was  
33 confirmed to be malignant glioma. They may have undergone some form of surgery  
34 to achieve histological diagnosis (biopsy or resection); (2) Study type: The clinical  
35 control study; (3) Intervention: bevacizumab group must include bevacizumab,  
36 which can be used alone or in combination with multiple drugs. The control group  
37 (Non-BEV) refers to treatment that did not include anti-angiogenesis agents, which  
38 can be placebo or supportive therapy, or active intervention (such as chemotherapy).  
39 (4) Outcome indicators: included in accordance with the following arbitrary outcome  
40 indicators: ① main indicators: progression-free survival rate, defined as the time from  
41 randomization to death or disease progression of any cause, and overall survival  
42 rate, defined as the time from randomization to death. ② key indicators: adverse  
43 events classified according to the World Health Organization (WHO) or the General  
44 terminology Standard of the National Cancer Institute (NCI-CTCAE (CTCAE2017)),  
45 including the percentage of treatment-related deaths.  
46  
47  
48  
49  
50  
51  
52  
53

54 Studies were excluded if they fulfilled the following conditions: Non-clinical  
55 control studies, incomplete abstract information, conference papers, reviews, and  
56 case reports. In addition, the literature of repeated publication and incomplete data  
57 that cannot extract valid data were excluded.  
58  
59  
60

## Data extraction

Literature screening, data extraction, and cross-checking were carried out by two independent researchers according to the initial inclusion and exclusion criteria, if there were any differences, they were discussed or judged with the assistance of a third person. For missing data, we contacted the author if possible. During the literature screening, the title and the abstract were read initially, after excluding obviously irrelevant literature, the full text was read to determine whether to include it or not. Upon matching the inclusion criteria of requirements, the following contents were extracted: (1) the basic information, including title, author, published country, publication date, research type; (2) study subjects, including the number of cases in each group, average age; (3) interventional factors, including the specific details of exposure factors, follow-up time, etc.; and (4) the outcome indicators.

## Quality assessment

Using the Cochrane collaboration tool, the risk of bias in individual studies was assessed from seven aspects (sequence generation, allocation hiding, uninformed participants and people, incomplete outcome data, selective reports, and other biases and risks)<sup>9</sup>. Finally, each project was evaluated at three levels: low risk, unclear, and high risk. The two authors conducted independent quality assessments and any differences among them were resolved through discussions with a third research expert.

## Statistical analysis

### Analysis of outcome index

PFS, OS, and adverse reactions were analyzed by Meta with RevMan5.1 software. The dichotomy data is expressed as the combined risk ratio (RR) or risk ratio (hazard ratio; HR), The measurement data is expressed as the mean difference (WMD). The interval estimation was expressed by 95%CI, and the test level of the effect quantity was  $\alpha = 0.05$ . The test for heterogeneity used  $I^2$  statistics. If there is no significant heterogeneity among studies ( $I^2 \leq 50\%$ ), we used the fixed effects model for data consolidation. While there is significant heterogeneity ( $I^2 > 50\%$ ) between the results of the study, the random effects model for data analysis would be used.

### Sensitivity analysis

Simultaneously, stata15.1 was used for sensitivity analysis, adopt the method of examining the impact of individual studies and eliminate them one by one, if the

value obtained is within the confidence interval on both sides, the result is stable. otherwise, they were regarded as unstable. If the results are unstable, it is proved that the elimination research has a great impact on the overall research results. We will conduct a professional analysis of the elimination research to find out the reasons for its impact on the results and study it. Studies included in literature > 10 were used to detect publication bias by funnel chart.

## RESULT

### Literature screening

A total of 1108 related literature were obtained in the initial examination. After screening the literature one by one, a total of 1123 patients were included in 11 clinical studies<sup>10-20</sup>. The flow chart and the results of literature retrieval are shown in figure 1.

### The basic characteristics of the inclusion study

For the inclusion study, the basic information for inclusion is completed using pre-developed forms (Tables 1, 2).

Table 1: basic information for inclusion in the study

| Study                                               | State  | Res<br>earc<br>h<br>type | Cases<br>(experime<br>ntal/<br>control ) | Ages(exper<br>imental /<br>control ) | Follow-up<br>time                                             | Outcome                                                                  |
|-----------------------------------------------------|--------|--------------------------|------------------------------------------|--------------------------------------|---------------------------------------------------------------|--------------------------------------------------------------------------|
| Olivier<br>L.<br>Chinot,<br>M.D <sup>2014[10]</sup> | France | RCT                      | 458/463                                  | 20-84/18-<br>79                      | The last<br>patient was<br>hospitalize<br>d for 17<br>months. | 1and2year survival<br>rates 、 safety and<br>quality of life、 PFS<br>、 OS |
| Qianru<br>Zhao <sup>2016[11]</sup>                  | China  | RCT                      | 25/24                                    | 24-71/27-                            | The<br>median<br>follow-up<br>time was<br>7.9 months          | disease control<br>rate 、 median<br>survival time、 OS<br>、 PFS           |

|                                               |             |             |          |                           |                                       |                                |
|-----------------------------------------------|-------------|-------------|----------|---------------------------|---------------------------------------|--------------------------------|
| Ulrich<br>Herrlinge<br>r <sup>2016</sup> [12] | German<br>y | RCT         | 116/54   | 25-78/26-<br>78           | Long-term<br>follow-up<br>until death | PFS-6, PFS, OS                 |
| Mark<br>R.Gilbert<br>2016[13]                 | German<br>y | RCT         | 320/317  | >18                       | 6 cycles                              | OS, PFS                        |
| Clara<br>Chen<br>2014[14]                     | Americ<br>a | Non-<br>RCT | 57/79/23 | 30-77/24-82/19-78         | >1year                                | OS, PFS, Adverse<br>reactione  |
| Hualong<br>Li <sup>2020</sup> [15]            | China       | RCT         | 31/31    | 18-70/19-<br>69           | 4 months                              | PFS6, DCR, Adverse<br>reaction |
| Zhixian<br>Zhang<br>2018 <sup>[16]</sup>      | China       | RCT         | 20/20    | 24-74                     | 5.2-<br>18months                      | PFS6, OS12                     |
| Jiaqi<br>Wang <sup>2013</sup><br>[17]         | China       | RCT         | 27/27    | 53.6 ± 9.7<br>/54.7 ± 8.8 | 6months-<br>2years                    | RR, DCR, Adverse<br>reaction   |
| Albert<br>Lai <sup>2010</sup> [18]            | Americ<br>a | RCT         | 70/110   | 31.3-<br>75.8/20.5-<br>90 | >42months                             | OS, PFS, Adverse<br>reaction   |
| B.Chauff<br>ert <sup>2014</sup> [19]          | Britain     | RCT         | 60/60    | 43-69/43-<br>71           | 6<br>months                           | OS, PFS, Adverse<br>reaction   |
| Carmen<br>Balana <sup>201</sup><br>6[20]      | Spain       | RCT         | 48/45    | 36-75/43-<br>75           |                                       | OS, PFS, Adverse<br>reaction   |



Table 2: basic characteristics of the inclusion study

| Study                                   | Male                         | Female                                  | Open biopsy                      | Partial resectio             | Complete resection          | experimental/control                                                         |
|-----------------------------------------|------------------------------|-----------------------------------------|----------------------------------|------------------------------|-----------------------------|------------------------------------------------------------------------------|
| Olivier L. Chinot, M.D. <sup>2014</sup> | 282 (61.6)<br>/298 (64.4)    | 176 (38.4)<br>/165 (35.6)               | 60<br>(13.1)<br>/44<br>(9.5)     | 210 (45.9)<br>/223<br>(48.2) | 188 (41.0)<br>/196 (42.3)   | Bevacizumab+<br>RT - TMZ/<br>Placebo+RT -<br>TMZ                             |
| Qianru Zhao <sup>2016</sup>             | 14/12                        | 11/12                                   | /                                | 15/16                        | 10/8                        | BEV+TMZ/TMZ                                                                  |
| Ulrich Herrlinge r <sup>2016</sup>      | 80 (69.0)<br>/34 (63.0)      | 36 (31.0)<br>/20 (37.0)                 | 0/2 (3.7)                        | 58 (50.0) /27<br>(50.0)      | 58<br>( 50.0) /25<br>(46.3) | BEV+IRI/TMZ                                                                  |
| Mark R.Gilbert <sup>2016</sup>          | /                            | /                                       | /                                | /                            | /                           | Bevacizumab/<br>Placebo                                                      |
| Clara Chen <sup>2014</sup>              | 30 (53) /45 (57)<br>/15 (65) | 57/79/23<br>27 (47) /34 (43)<br>/8 (35) | 34 (60) /4<br>4 (56) /14<br>(61) | 20 (35) /33 (42)<br>/9 (39)  | 3 (5) /2 (2) /<br>0 (0)     | Bevacizumab<br>monotherapy<br>/Bevacizumab<br>combination<br>/Nonbevacizumab |
| Hualong Li <sup>2020</sup>              | 19/18                        | 12/13                                   | /                                | /                            | /                           | TMZ+BEV/TMZ                                                                  |

|                               |       |       |       |       |       |                                              |
|-------------------------------|-------|-------|-------|-------|-------|----------------------------------------------|
| Zhixian Zhang <sup>2018</sup> | 22    | 18    | /     | 18    | 22    | BEV+TMZ/<br>Gamma knife<br>+TMZ/             |
| Jiaqi Wang <sup>2013</sup>    | 16/14 | 11/13 | /     | /     | /     | TMZ+BEV/TMZ                                  |
| Albert Lai <sup>2010</sup>    | 31/40 | 39/70 | 2/23  | 40/40 | 28/47 | RT+TMZ+BV/UC<br>LA/KPLA<br>Control<br>RT/TMZ |
| B.Chauffert <sup>2014</sup>   | 26/23 | 34/37 | /     | /     | /     | BEV+IRI/TMZ<br>Z+RT                          |
| Carmen Balana                 | 31/25 | 17/20 | 42/35 | /     | /     | TMZ+BEV/TMZ                                  |

### Risk of bias assessment

The results of the bias risk assessment included in the study are shown in figure 2.

### Meta-analysis results

#### Progression-free survival

Seven studies<sup>10,12-14,18-20</sup> reported median progression-free survival (BEV group, n=1160) and Non-BEV group (n=1027). There was no significant difference in the heterogeneity test ( $I^2=34% < 50%$ ), so the fixed effect model was used for data analysis. Results suggested that the median progression-free survival of gliomas treated with BEV was significantly longer than that of malignant gliomas treated with Non-BEV (HR 0.71, 95%CI, 0.65 to 0.78,  $P < 0.00001$ ), As shown in figure 3.

Ten studies<sup>10-19</sup> compared PFS ratios at different follow-up between the Bev group and the Non-BEV group. There was a significant difference in the total heterogeneity test ( $I^2=71% > 50%$ ), so the random effect model was used. Through the results found it was found that the PFS in the BEV group was higher than that in the Non-BEV group at 6 months (OR 3.31, 95%CI 2.74 to 4.00,  $p < 0.00001$ ), 12

1  
2  
3  
4 months (OR 2.05, 95%CI 1.70 to 2.49,  $p < 0.00001$ ) and 18 months (OR 1.31, 95%CI  
5 1.02 to 1.69,  $p = 0.03$ ). But at 24 months (OR 0.83, 95%CI 0.50 to 1.37,  $p = 0.47$ ),  $P >$   
6 0.05, so there was no significant statistical difference between the two groups. At 30  
7 months (OR 0.62, 95%CI 0.39 to 0.97,  $p = 0.04$ ),  $0.61 < 1$ , the diamond pattern falls  
8 on the group that supports Non-BEV group, so the PFS of the BEV group was lower  
9 than that of the Non-BEV group, as shown in figure 4.

### Overall survival time

14 Seven studies<sup>10,12-14,18-20</sup> reported the median overall survival time, and  
15 there was a significant difference in the total heterogeneity test ( $I^2 = 71\% > 50\%$ ), so  
16 the random effect model was used. Results suggesting that there was no significant  
17 difference in median overall survival time between the BEV group and Non-BEV  
18 group (HR 0.90, 95%CI, 0.73 to 1.10,  $P = 0.30$ ), as shown in figure 5.

22 Six studies<sup>10,12-14,18-19</sup> compared OS ratios at different follow-up between the  
23 Bev group and the Non-BEV group. there was no significant difference in the  
24 heterogeneity test ( $I^2 = 38\% < 50\%$ ), so the fixed effect model was used for data  
25 analysis. Through the results found it was found that the OS in the BEV group was  
26 higher than that in the Non-BEV group at 6 months (OR 1.41; 95%CI, 1.07-1.84;  
27  $P = 0.01$ ), 12 months (OR 1.31; 95%CI, 1.09-1.58;  $P = 0.005$ ). But at 18 months (OR  
28 0.95; 95%CI, 0.79-1.14;  $P = 0.58$ ), 24 months (OR 1.10; 95%CI, 0.89-1.35;  
29  $P = 0.39$ ), and 30 months (OR 0.90; 95%CI, 0.69-1.18;  $P = 0.44$ ),  $P > 0.05$ , so  
30 there was no significant statistical difference between the two groups, as shown in  
31 figure 6.

### Adverse reaction

37 As shown in figure 7, there were six studies<sup>10-11,13-15</sup> that compared adverse  
38 reactions between the BEV group and the Non-BEV group. There was a significant  
39 difference in the total heterogeneity test ( $I^2 = 54\% > 50\%$ ), and the random effect  
40 model was used. The results showed the combined OR values of hypertension,  
41 hemorrhage, hematencephalon, albuminuria, and thromboembolism as follows:  
42 hypertension (OR 5.14, 95%CI 3.79 to 6.96,  $P < 0.00001$ ), hemorrhage (OR 2.62,  
43 95%CI 1.96 to 3.49,  $P < 0.00001$ ), hematencephalon (OR 2.26, 95%CI 1.08 to 4.72,  
44  $P = 0.03$ ), albuminuria (OR 4.04, 95%CI 2.56 to 6.37,  $P < 0.00001$ ) and  
45 thromboembolism (OR 1.57, 95%CI 0.88 to 2.77,  $P = 0.13$ ). Through the results found  
46 it was found that the adverse reactions in the BEV group was higher than that in the  
47 Non-BEV group.

### Sensitivity analysis

51 The sensitivity test was used to evaluate the stability of OS, PFS, and adverse  
52 reactions in the included literature, which showed that all values remained in the  
53  
54  
55  
56  
57  
58  
59  
60

confidence interval on both sides after one by one elimination. Hence, it can be concluded that all the included literature is stable, as shown in figures 8,9.

### **Publication bias**

As shown in figures 10, the funnel chart was mainly concentrated at the top. Moreover, the symmetry was also proper, so it was concluded that the possibility of publication bias was small.

### **DISCUSSION**

According to histopathological and clinical features, gliomas are divided into astrocytoma, oligodendroglioma, oligodendroglioma and ependymoma, which are the most common malignant tumors derived from neuroepithelium. Although the technical level of surgery, radiotherapy and chemotherapy<sup>21</sup> in the treatment of glioma has been greatly improved, but the recurrence rate and mortality rate are still high, so there is an urgent need for a new treatment. Glioma affects the body through a variety of pathophysiological processes, in which angiogenesis plays an important role in the occurrence and development of glioma, so blocking angiogenesis has become a new direction of treatment. Bevacizumab is an anti-(VEGF) antibody against vascular endothelial growth factor<sup>22</sup>, which acts mainly by competing against VEGF, and binding to VEGFR on the target cell membrane. Pope<sup>23</sup> and other studies have shown that the high surface of VEGF affects blood vessel density and tumor grade. Some studies have shown that Ang2/Tie2<sup>24,25</sup> and STAT3<sup>26</sup> are two important signal pathways in anti-angiogenic therapy, which play a good role in inhibiting peritumoral edema and the increase of neurological symptoms. In order to better understand the advantages and disadvantages of BEV on glioma, this study has a better understanding of the efficacy and safety of BEV through systematic review.

The results of our study showed that the PFS of BEV group was higher than that of Non-BEV group during the follow-up period of < 18 months, but when the follow-up time was 30 months, the PFS of BEV group was lower than that of Non-BEV; meanwhile, It was found that the OS in the BEV group was higher than that in the Non-BEV group at 6 months,12 months, but after 12 months, there was no statistically significant difference between the BEV group and the non-BEV group. The study of Li YD<sup>27</sup> showed that the progression-free survival time at 24 months and 36 months in the bevacizumab group was lower than that in the non-bevacizumab group; The results of LiaoKL<sup>28</sup> showed that a higher incidence of PFS could be obtained by adding BEV to newly diagnosed GB, and this combined treatment did not improve OS. The AVAglia<sup>29</sup> trial showed that patients treated with bevacizumab had significant advantages in PFS (6.2 months vs. 10.6 months) and

1  
2  
3  
4 maintenance of life quality, but showed no advantages in OS (16.8 months vs. 16.7  
5 months).2.2% of patients treated with bevacizumab confirmed false progression,  
6 compared with 9.3% of patients treated with non-bevacizumab.Vredenburgh<sup>30</sup>  
7 found in a single-group clinical phase 2 experimental study that the median PFS of  
8 bevacizumab combined with temozolomide and radiotherapy reached nearly twice  
9 the standard of 3-14 months, however the overall survival was not significant  
10 Improvement.Chinot<sup>31</sup> and Gilbert<sup>32</sup> conducted phase 3 clinical trials with a placebo  
11 control group, the results showed that PFS increased by 40%-71% compared with  
12 the control group. Special related research on OS, Brandes<sup>33</sup> and Wick<sup>34</sup> also found  
13 that BEV failed to improve OS of patients with glioma in a randomized study  
14 analyzing bevacizumab. From the above research, BEV can improve the PFS of  
15 glioma patients within 18 months, but the PFS of patients may be reduced after 30  
16 months. It has no obvious significance to improve OS.

17  
18  
19  
20  
21  
22  
23  
24 This study showed that after the application of BEV, there were five common  
25 adverse reactions: hypertension, hemorrhage, hematencephalon, albuminuria and  
26 thromboembolism. A phase II trial of Japanese<sup>35</sup> showed that the most common side  
27 effects were albuminuria, hypertension, hemorrhage, fever and epilepsy. Studies<sup>36</sup>  
28 showed that the incidence of adverse reactions above grade 3 was 27.1% to 46.4%,  
29 the most common events were thromboembolism, hypertension, epilepsy, fatigue  
30 and intestinal perforation. Zhang Li<sup>37</sup> searched 20 articles about adverse reactions  
31 caused by BEV, and found that the main adverse reactions were cardiovascular and  
32 hematological diseases. Norden<sup>38</sup> evaluated 64 glioma patients who received BEV  
33 anticoagulant therapy and 64 glioma patients who did not receive anticoagulant  
34 therapy, The results showed that the incidence of intracranial hemorrhage and other  
35 bleeding in patients treated with anticoagulants was significantly higher than that in  
36 patients with BEV alone, but the incidence of severe intracranial hemorrhage was  
37 within an acceptable range. Therefore, when using bevacizumab clinically, it is  
38 necessary to closely observe drug adverse reactions, monitor blood pressure,  
39 coagulation function and other indicators, and deal with symptoms in time.

40  
41  
42  
43  
44  
45  
46  
47  
48 From the above research results, it can be concluded that long-term use of BEV  
49 does not increase the patient's PFS, BEV can improve the PFS of glioma patients  
50 within 18 months, but the PFS of patients may be reduced after 30 months. Nagham  
51 Kaka found<sup>39</sup> that BEV could have a role in the treatment of particular subgroups of  
52 patients with newly diagnosed GBM. Several studies<sup>40,41</sup> have found that the median  
53 PFS of patients with methylation is longer than that of MGMT unmethylated tumors  
54 treated with RT and TMZ combined with BEV. Sandmann and colleagues<sup>42</sup> found  
55 that BEV combined with standard TMZ and RT can improve the survival rate of  
56  
57  
58  
59  
60

1  
2  
3  
4 neurotumors, while poorly differentiated mesenchymal tumors may make tumors  
5 resistant to BEV over time. Adilijiang and Colleagues<sup>43</sup> found that treatment with  
6 BEV and TMZ results in the upregulation of certain microenvironment related genes  
7 in IDH1 mutant tumors in vitro, specifically those involving immune response and  
8 extracellular matrix organization. Therefore, The question of whether the limitation  
9 of BEV in the treatment of gliomas is due to fixed subsets deserves constant  
10 attention.  
11  
12  
13

14 Studies have shown<sup>44,45</sup> that antiangiogenic therapy can lead to a transition of  
15 glioma to a more aggressive phenotype. In retrospective analysis<sup>46,47</sup> a trend toward  
16 enhanced infiltrative disease was seen in bevacizumab-treated glioma patients  
17 suggesting that enhanced tumor inhibition may be a consequence of VEGF  
18 signaling blockade. Shiao-Pei Weathers<sup>48</sup> shows that determining the best biological  
19 dose and the subgroup of patients most likely to obtain long-lasting benefits can  
20 improve the durability of bevacizumab. Victor A Levin<sup>49</sup> found treatment for recurrent  
21 GBM with BEV appears to improve survival at a dose lower than that in the FDA  
22 drug insert. Study<sup>50</sup> suggest that the higher dosage of BEV utilized may have  
23 impacted survival benefits. Animal models<sup>51</sup> also suggest that higher dose of anti-  
24 VEGF treatment, resulting in more hypoxia, may increase tumor aggressiveness.  
25 Ryota Tamura<sup>52</sup> found that high doses and long-term use of anti-VEGF/VEGFR may  
26 lead to hypoxia. Shiao-Pei Weathers<sup>48</sup> proposed in tumors where excessive vascular  
27 pruning takes place, hypoxia exacerbated by antiangiogenic therapy is likely  
28 responsible for initiating a cascade of events. As mentioned above, there are many  
29 possible reasons for the limited efficacy of antiangiogenic therapy. But The lack of  
30 a long-lasting response to current antiangiogenic treatment underscores the need  
31 for a better understanding of how to use antiangiogenic therapy to optimize radiation  
32 and chemotherapy treatments.  
33  
34  
35  
36  
37  
38  
39  
40  
41  
42  
43

#### 44 **CONCLUSIONS**

45 The evidence suggests that BEV can significantly prolong the PFS of patients  
46 with glioma within 18 months and shorten the PFS of patients after 30 months. This  
47 limitation may be related to the subgroup of patients, the change of recurrence mode,  
48 the optimal dose of drug, the increase of hypoxia, the enhancement of invasiveness  
49 and so on. BEV treatment has no obvious meaning in improving OS, and it has some  
50 side effects, which are acceptable, but we still need to pay close attention to it and  
51 take active measures to reduce the side effects. Therefore, it is necessary to carry  
52 out more samples and higher quality large-scale research in the future.  
53  
54  
55  
56

#### 57 **Declaration:**

58  
59  
60

**Contributors** WH and GJX contributed to conception and design. WH、WTZ and WK contributed to data acquisition or analysis and interpretation of data. WH、GJX、WTZ、WZJ and STZ were involved in drafting the manuscript or revising it critically for important intellectual content. All authors have given final approval of the version to be published.

**Funding** This study was funded by The First Affiliated Hospital of Xi'an Jiaotong University. The funder had no role in the design of the study, the collection, analysis or interpretation of data, the writing of the report or the decision to submit the paper for publication. Award/Grant number is not applicable.

**Ethics Approval** This study belongs to data research and is not applicable to ethical review.

**Competing interests** None declared.

**Competing interests of Reviewer:** None

**Provenance and peer review** Not commissioned; externally peer reviewed.

**Data sharing** All data relevant to the study are included in the article or uploaded as supplementary information.

All the illustrations are as follows:

Figure 1: document screening process and results

PubMed (n=259), The Cochrane Library (n=153), EMbase (n=155), CNKI (n=118), CBM (n=358), WanFang (n=65).

Figure 2: bias risk assessment form

Figur 3:HR of median PFS in BEV group and Non-BEV group in the treatment of glioma

Figur 4:OR of PFS at each follow-up time in BEV group and Non-BEV group in the treatment of glioma

Figure 5:HR of median OS in BEV group and Non-BEV group in the treatment of glioma

Figure 6: OR of OS at each follow-up time in the treatment of glioma in the BEV group and Non-BEV group

Figure 7: OR of adverse reactions in the treatment of glioma in the BEV group and Non-BEV group

Figure 8:A: the sensitivity analysis of PFS6 ;B: the sensitivity analysis of PFS12; C:the sensitivity analysis of PFS18;D:the sensitivity analysis of PFS24;E:the sensitivity analysis of PFS30

1  
2  
3  
4 Figure 9:A: the sensitivity analysis of OS6 ;B: the sensitivity analysis of OS12; C:the  
5 sensitivity analysis of OS18;D:the sensitivity analysis of OS24;E:the sensitivity  
6 analysis of OS30

7  
8 Figure 10:A: funnel chart of PFS at each follow-up time;B: funnel chart of OS at  
9 each follow-up time  
10  
11  
12

### 13 REFERENCES

- 14 1 Brem S,Tsanaclis AM,Gately S,et al.Immunolocalization of basic fibroblast growth  
15 factor to the microvasculature of human brain tumors. *Cancer* 1992; 70: 2673-80.  
16 2 Xia S,Lal B,Tung B,et al.Tumor microenvironment tenascin-C promotes  
17 glioblastoma invasion and negatively regulates tumor proliferation.*Neuro Oncol*  
18 2015;18:507 -517.  
19 3 Stupp R,Pavlidis N,Jelic S,et al.ESMO Minimum Clinical Recommendations for  
20 diagnosis, treatment and follow-up of malignant glioma. *Ann Oncol* 2005; 16 Suppl  
21 1:i64-5.  
22 4 Higgins JPT, Altman DG, Gøtzsche PC, et al. The Cochrane Collaboration' s tool  
23 for assessing risk of bias in randomised trials. *BMJ* 2011; 343:d5928.  
24 5 Sweet JA, Feinberg ML, Sherman JH. The role of avastin in the management  
25 of recurrent glioblastoma. *Neurosurg Clin N Am* 2012;23:331-341.  
26 6 Cohen MH, Shen YL, Keegan P, et al. FDA drug approval summary:  
27 bevacizumab (Avastin) as treatment of recurrent glioblastoma multiforme.*Oncologist*  
28 2009;14:1131-1138.  
29 7 Kreisl TN, Kim L, Moore K, et al. Phase II trial of single-agent bevacizumab followed  
30 by bevacizumab plus irinotecan at tumor progression in recurrent glioblastoma. *J*  
31 *Clin Oncol* 2009; 27:740 - 5.  
32 8 Friedman HS, Prados MD, Wen PY, Mikkelsen T, Schiff D, Abrey LE, et al.  
33 Bevacizumab alone and in combination with irinotecan in recur-rent glioblastoma. *J*  
34 *Clin Oncol* 2009; 27:4733 - 40.  
35 9 Gs HJP. Cochrane handbook for systematic reviews of interventions version 5.1.0  
36 (updated March 2011).*Naunyn-Schmiedebergs Archiv für Experimentelle Pathologie*  
37 *und Pharmakologie* 2014;5:S38.  
38 10 Olivier L. Chinot, M.D., Wolfgang Wick, M.D., Warren Mason, et al. Bevacizumab  
39 plus Radiotherapy-Temozolomide for Newly Diagnosed Glioblastoma. *The New*  
40 *England Journal of Medicine* 2014; 370:709-722.  
41 11 Zhao Qianru. Efficacy and safety of bevacizumab combined with temozolomide  
42 in the treatment of recurrent malignant gliomas. Zhengzhou University, 2016.  
43  
44  
45  
46  
47  
48  
49  
50  
51  
52  
53  
54  
55  
56  
57  
58  
59  
60



1  
2  
3  
4 12 Ulrich Herrlinger, Niklas Schäfer, Joachim P, et al. Bevacizumab Plus Irinotecan  
5 Versus Temozolomide in Newly Diagnosed O6-Methylguanine-DNA  
6 Methyltransferase Nonmethylated Glioblastoma: The Randomized GLARIUS Trial.  
7 Journal of clinical oncology 2015; 63:4691.  
8

9  
10 13 Mark R. Gilbert, James J. Dignam, Terri S. Armstrong, et al. A Randomized Trial  
11 of Bevacizumab for Newly Diagnosed Glioblastoma. The New England Journal of  
12 Medicine 2014;370:699-708.  
13

14 14 Clara Chen,rliene Ravelo,Elaine Yu,et al.Clinical outcomes with bevacizumab-  
15 containing and non-bevacizumab - containing regimens in patients with recurrent  
16 glioblastoma from US community practices.CLINICAL STUDY 2015;DOI  
17 10.1007/s11060-015-1752-y.  
18

19 15 Li Hualong, Qiang Ming, Huang Xiaoqin, et al. Efficacy of bevacizumab combined  
20 with temozolomide in the treatment of malignant recurrent gliomas. Anhui  
21 Medicine,2020;41:66-68.  
22

23 16 Zhang Zhixian, Gu Hou, Lin Jian, et al.Clinical efficacy of gamma knife combined  
24 with bevacizumab in the treatment of postoperative malignant gliomas. Journal of  
25 Kunming Medical University 2018;39:33-37.  
26

27 17 Wang Jiaqi, Liang Yong, Ouyang Zheng, et al. Clinical analysis of bevacizumab  
28 combined with temozolomide in the treatment of glioblastoma. Oncology Pharmacy  
29 2013;3:274-277.  
30

31 18 Albert Lai,Anh Tran,Phioanh L,et al.Phase II Study of Bevacizumab Plus  
32 Temozolomide During and After Radiation Therapy for Patients With Newly  
33 Diagnosed Glioblastoma Multiforme.JOURNAL OF CLINICAL ONCOLOGY  
34 2010;30:2709.  
35

36 19 Chauffert B,Feuvret L,Bonnetain F, et al. Randomized phase II trial of irinotecan  
37 and bevacizumab as neo-adjuvant and adjuvant to temozolomide-based  
38 chemoradiation compared with temozolomide-chemoradiation for unresectable  
39 glioblastoma: final results of the TEMAVIR study from ANOCEF. Annals of Oncology  
40 Official Journal of the European Society for Medical Oncology 2014;25:1442.  
41

42 20 Carmen Balana,Ramon De Las Penas,Juan Manuel Sepu'lveda, et  
43 al.Bevacizumab and temozolomide versus temozolomide alone as neoadjuvant  
44 treatment in unresected glioblastoma:the GENOM 009 randomized phase II trial. J  
45 Neurooncol 2016;DOI 10.1007/s11060-016-2065-5  
46

47 21 Lu Yuntao, Qi Songtao, Ouyanghui, et al. Surgical and therapeutic strategies for  
48 recurrent malignant gliomas in refractory sites.Chinese Journal of Modern  
49 Neurological Diseases 2012;12 (6): 682-690.  
50  
51  
52  
53  
54  
55  
56  
57  
58  
59  
60

- 1  
2  
3  
4 22 Cheng Haixia,Wang Yin. Hair cell astrocytoma with vascular central arrangement:  
5 case report and literature review.Chinese Journal of Modern  
6 Neurology.2013;13:342-348.  
7  
8 23 Pope WB,Xia Q,Paton VE,et al.Patterns of progression in patients with recurrent  
9 glioblastoma treated with bevacizumab.Neurology 2011;76:432-437.  
10  
11 24 Park JS,Kim IK,Han S,et al.Normalization of tumor vessels by Tie2 activation and  
12 Ang2 inhibition enhances drug delivery and produces a favorable tumor  
13 microenvironment. Cancer Cell 2016;30:953—967.  
14  
15 25 Labussiare M,Cheneau C,Praht C,et al.Angiopietin-2 may be involved in the  
16 resistance to bevacizumab in recurrent glioblastoma. Cancer Invest 2016; 34:39—  
17 44.  
18  
19 26 Groot J,Liang J,Kong LY,et al . Modulating antiangiogenic resistance by  
20 inhibiting the signal transducer and activator of transcription 3 pathway in  
21 glioblastoma.Oncotarget 2012;3(9):1036-1048.  
22  
23 27 Li Y,Hou M,Lu G,et al.The Prognosis of Anti-Angiogenesis Treatments Combined  
24 with Standard Therapy for Newly Diagnosed Glioblastoma: A Meta-Analysis of  
25 Randomized Controlled Trials. Plos One 2016,11:e0168264.  
26  
27 28 Liao KL,Huang S,Wu YP.The prognosis for patients with newly diagnosed  
28 glioblastoma receiving bevacizumab combination therapy: a meta-analysis.  
29 OncoTargets and therapy 2018;11:3513-3520.  
30  
31 29 Chinot O, Cloughesy T, Henriksson R, et al. Efficacy and safety of bevacizumab  
32 (Bv) plus standard combination temozolomide (T) and radiotherapy (RT) in newly  
33 diagnosed glioblastoma: final results from a AVA glo. Eur J Cancer 2013; 49(suppl  
34 2):S774-5.  
35  
36 30 Vredenburgh JJ, Desjardins A, Kirkpatrick JP, et al. Addition of bevacizumab to  
37 standard radiation therapy and daily temozolomide is associated with minimal  
38 toxicity in newly diagnosed glioblastoma multiforme. Int J Radiat Oncol Biol Phys  
39 2012;82:58-66.  
40  
41 31 Chinot OL,Wick W,Mason W,et al. Bevacizumab plus radiotherapy-temozolomide  
42 for newly diagnosed glioblastoma. N Engl J Med 2014;370:709 - 22.  
43  
44 32 Gilbert MR, Dignam JJ, Armstrong TS, et al. A randomized trial of bevacizumab  
45 for newly diagnosed glioblastoma. N Engl J Med 2014;370:699 - 708.  
46  
47 33 Brandes, A.A.,Finocchiaro, G.,Zagonel, V.,et al.Final results from the  
48 randomized phase II trial average (ML25739) with bevacizumab or fotemustine in  
49 recurrent GBM. Neuro-Oncol 2014;16:v8 - v22.  
50  
51 34 Wick, W.,Brandes, A.A.,Gorlia, T.,et al.Phase III trial exploring the combination  
52 of bevacizumab and lomustine in patients with first recurrence of a glioblastoma:  
53 the EORTC 26101 trial.Neuro-Oncol 2015;17:v1.  
54  
55  
56  
57  
58  
59  
60

1  
2  
3  
4 35 Friedman HS, Prados MD, Wen PY, et al. Bevacizumab alone and in combination  
5 with irinotecan in recurrent glioblastoma. *J Clin Oncol*.2009;27:4733 – 40.

6  
7 36 Nagane M,Nishikawa R,Narita Y,et al.Phase II study of single-agent  
8 bevacizumab in Japanese patients with recurrent malignant glioma.*Jpn J Clin Oncol*  
9 2012;42:887 – 95.

10  
11 37 Zhang Li. Statistical analysis of adverse reactions caused by bevacizumab.  
12 *Clinical Medical Engineering* 2012;19:129-130.

13  
14 38 Norden AD,Bartolomeo J,Tanaka S,et al.Safety of concurrent bevacizumab  
15 therapy and anticoagulation in glioma patients. *J Neurooncol* 2011;106:121-125.

16  
17 39 Nagham Kaka,Karim Hafazalla,Haider Samawi,et al.Progression-Free but No  
18 Overall Survival Benefit for Adult Patients with Bevacizumab Therapy for the  
19 Treatment of Newly Diagnosed Glioblastoma:A Systematic Review and Meta-  
20 Analysis.*Cancers* 2019;11:1723.

21  
22 40 Chinot, O.L.;Wick, W.;Mason, W.;et al.Bevacizumab plus radiotherapy-  
23 temozolomide for newly diagnosed glioblastoma.*New Engl. J. Med* 2014;370:709 –  
24 722.

25  
26 41 Gilbert, M.R.;Dignam, J.J.;Armstrong, T.S.;et al.A randomized trial of  
27 bevacizumab for newly diagnosed glioblastoma. *New Engl.J.Med* 2014;370:699 –  
28 708.

29  
30 42 Phillips, H.S.;Kharbanda, S.;Chen, R.;et al. Molecular subclasses of high-grade  
31 glioma predict prognosis, delineate a pattern of disease progression, and resemble  
32 stages in neurogenesis.*Cancer Cell* 2006;9:157 – 173.

33  
34 43 Adilijiang, A.;Hirano, M.;Okuno, Y.;et al.Next generation sequencing-based  
35 transcriptome predicts bevacizumab efficacy in combination with temozolomide in  
36 glioblastoma. *Molecules* 2019;24:3046.

37  
38 44 Piao Y , Liang J, Holmes L, et al. Acquired resistance to anti-VEGF therapy in  
39 glioblastoma is associated with a mesenchymal transition.*Clin Cancer Res*  
40 2013;19:4392 – 403.

41  
42 45 Lu KV , Chang JP , Parachoniak CA, et al. VEGF inhibits tumor cell invasion and  
43 mesenchymal transition through a MET/VEGFR2 complex.*Cancer Cell* 2012;22:21 –  
44 35.

45  
46 46 Norden A,Young G,Setayesh K,et al.Bevacizumab for recurrent malignant  
47 gliomas: efficacy, toxicity, and patterns of recurrence.*Neurology* 2008;70:779 – 87.

48  
49 47 Soda Y,Myskiw C,Rommel A, Verma I. Mechanisms of neovas-  
50 cularization and resistance to anti-angiogenic therapies in glioblas-  
51 toma multiforme. *J Mol Med (Berl)*  
52 2013;91:439 – 48.

53  
54 48 Shiao-Pei Weathers,John de Groot.Resistance to Antiangiogenic Therapy.*Curr*  
55 *Neurol Neurosci Rep* 2014;14:443.

1  
2  
3  
4 49 Victor A. Levin, Nancy D, et al. Mendelssohn, James Chan. Impact of bevacizumab  
5 administered dose on overall survival of patients with progressive glioblastoma. J  
6 Neurooncol 2015;122:145-50.

7  
8 50 Lorgis V, Maura G, Coppa G, et al. Relation between bevacizumab dose intensity  
9 and high-grade glioma survival: a retrospective study in two large cohorts. J  
10 NeuroOncol 2012, 107:351–358.

11  
12 51 Keunen O, Johansson M, Oudin A, et al. Anti-VEGF treatment reduces blood supply  
13 and increases tumor cell invasion in glioblastoma. Proc Natl Acad Sci USA Proc Natl  
14 Acad Sci U S A 2011;108:3749-54.

15  
16 52 Ryota Tamura, Toshihide Tanaka, Yasuharu Akasaki, et al. The role of vascular  
17 endothelial growth factor in the hypoxic and immunosuppressive tumor  
18 microenvironment: perspectives for therapeutic implications. Med Oncol 2019;37:2.  
19  
20  
21  
22  
23  
24  
25  
26  
27  
28  
29  
30  
31  
32  
33  
34  
35  
36  
37  
38  
39  
40  
41  
42  
43  
44  
45  
46  
47  
48  
49  
50  
51  
52  
53  
54  
55  
56  
57  
58  
59  
60

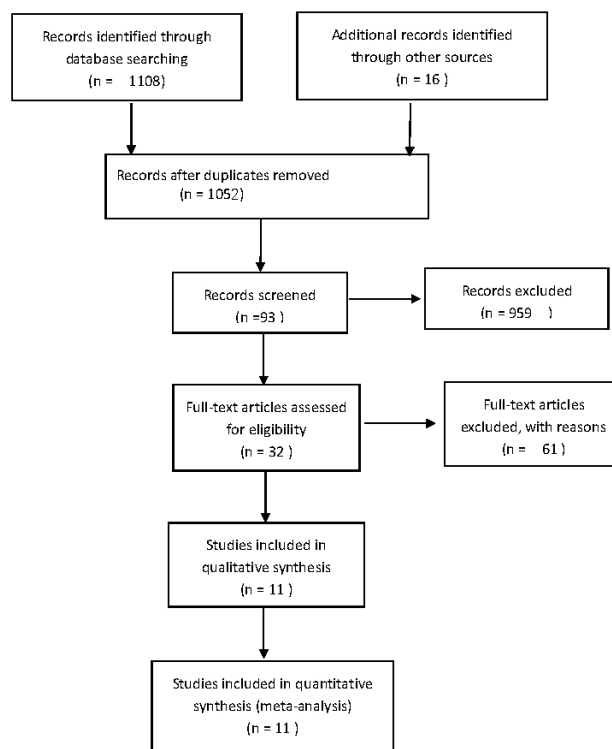

Figure 1: document screening process and results

34  
35  
36  
37  
38  
39  
40  
41  
42  
43  
44  
45  
46  
47  
48

Figure 1: document screening process and results  
PubMed (n=259), The Cochrane Library (n=153), EMBASE (n=155), CNKI (n=118), CBM (n=358), WanFang (n=65).

49  
50  
51  
52  
53  
54  
55  
56  
57  
58  
59  
60

209x296mm (120 x 120 DPI)

|                        | Random sequence generation (selection bias) | Allocation concealment (selection bias) | Blinding of participants and personnel (performance bias) | Blinding of outcome assessment (detection bias) | Incomplete outcome data (attrition bias) | Selective reporting (reporting bias) | Other bias |
|------------------------|---------------------------------------------|-----------------------------------------|-----------------------------------------------------------|-------------------------------------------------|------------------------------------------|--------------------------------------|------------|
| Albert Lai 2010        | ?                                           | ?                                       | +                                                         | +                                               | +                                        | +                                    | +          |
| B. Chauffert 2014      | +                                           | ?                                       | +                                                         | +                                               | +                                        | +                                    | +          |
| Carmen Balana 2016     | +                                           | +                                       | -                                                         | ?                                               | +                                        | +                                    | +          |
| Clara Chen 2014        | -                                           | ?                                       | ?                                                         | ?                                               | +                                        | +                                    | +          |
| HuaLong Li 2013        | +                                           | ?                                       | +                                                         | +                                               | +                                        | +                                    | +          |
| JiaQi Wang 2013        | +                                           | ?                                       | +                                                         | +                                               | +                                        | +                                    | +          |
| Mark R. Gilbert 2016   | +                                           | ?                                       | +                                                         | +                                               | +                                        | +                                    | +          |
| Olivier L. Chinot 2014 | +                                           | ?                                       | +                                                         | +                                               | +                                        | +                                    | -          |
| Qianru Zhao 2016       | +                                           | ?                                       | +                                                         | +                                               | +                                        | +                                    | +          |
| Ulrich Herrlinger 2016 | +                                           | ?                                       | -                                                         | -                                               | +                                        | +                                    | +          |
| ZhiXian Zhang 2018     | -                                           | ?                                       | ?                                                         | ?                                               | +                                        | +                                    | +          |

Figure 2: bias risk assessment form

209x278mm (120 x 120 DPI)

1  
2  
3  
4  
5  
6  
7  
8  
9  
10  
11  
12  
13  
14  
15  
16  
17  
18  
19  
20  
21  
22  
23  
24  
25  
26  
27  
28  
29  
30  
31  
32  
33  
34  
35  
36  
37  
38  
39  
40  
41  
42  
43  
44  
45  
46  
47  
48  
49  
50  
51  
52  
53  
54  
55  
56  
57  
58  
59  
60

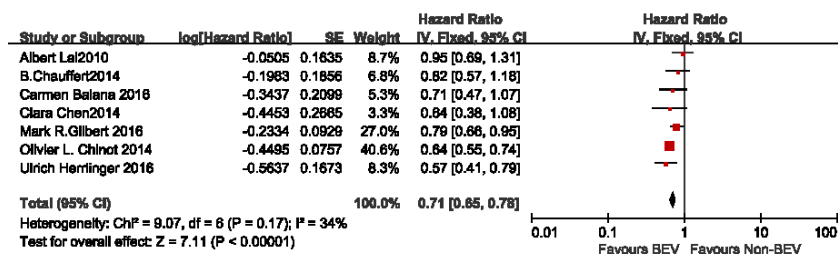

Figur 3:HR of median PFS in BEV group and Non-BEV group in the treatment of glioma  
 209x278mm (120 x 120 DPI)

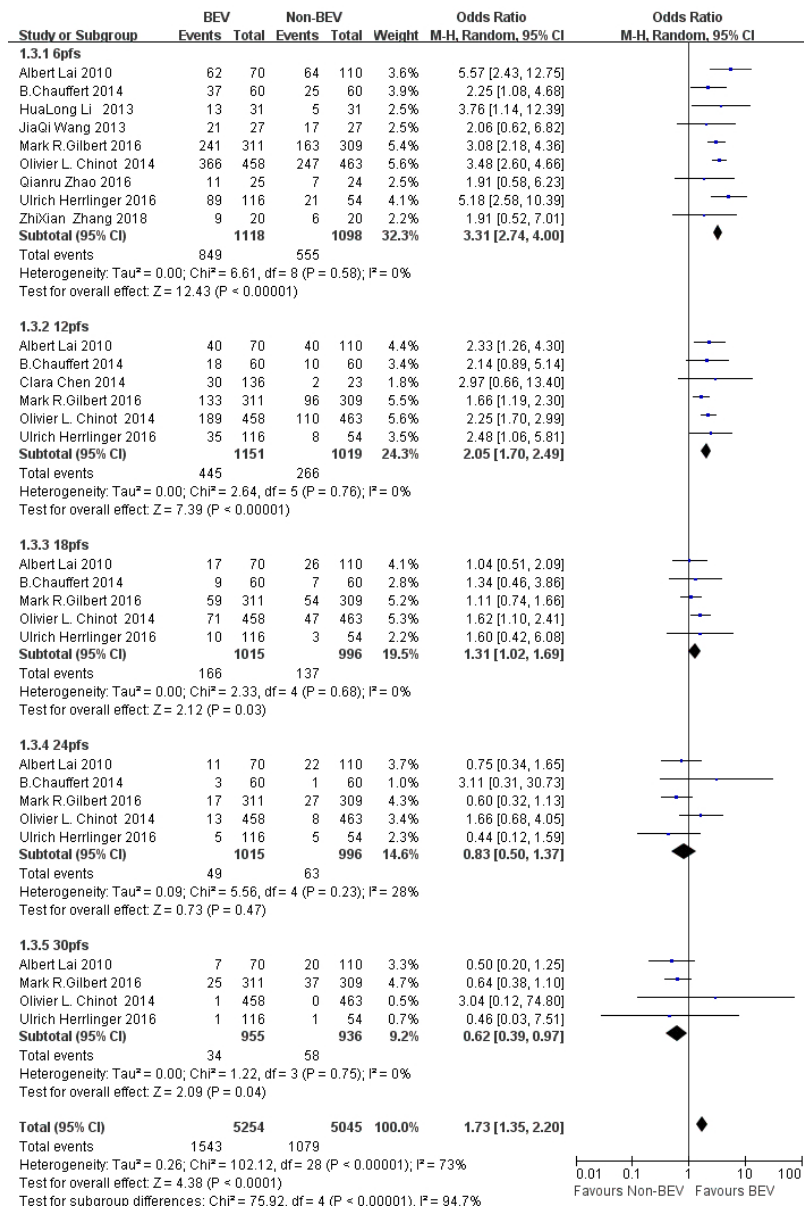

Figur 4:OR of PFS at each follow-up time in BEV group and Non-BEV group in the treatment of glioma

150x223mm (120 x 120 DPI)



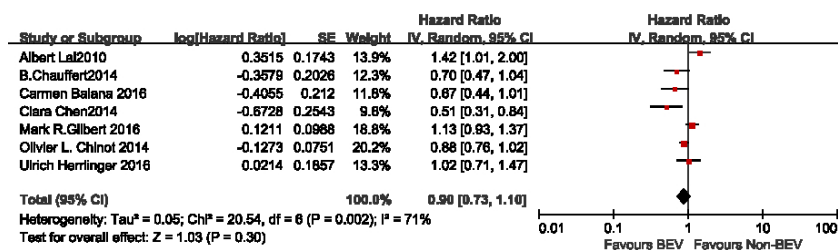

Figure 5:HR of median OS in BEV group and Non-BEV group in the treatment of glioma

209x278mm (120 x 120 DPI)

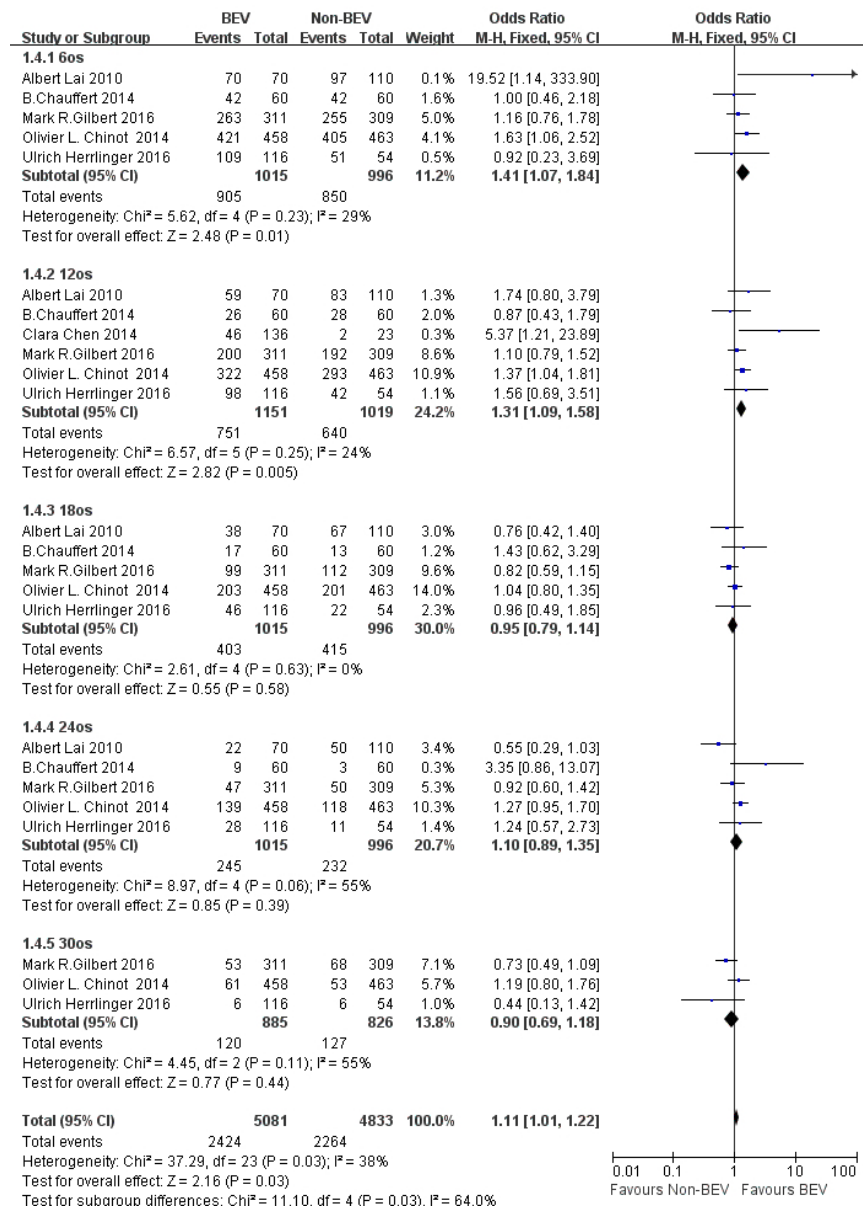

Figure 6: OR of OS at each follow-up time in the treatment of glioma in the BEV group and Non-BEV group

148x206mm (120 x 120 DPI)

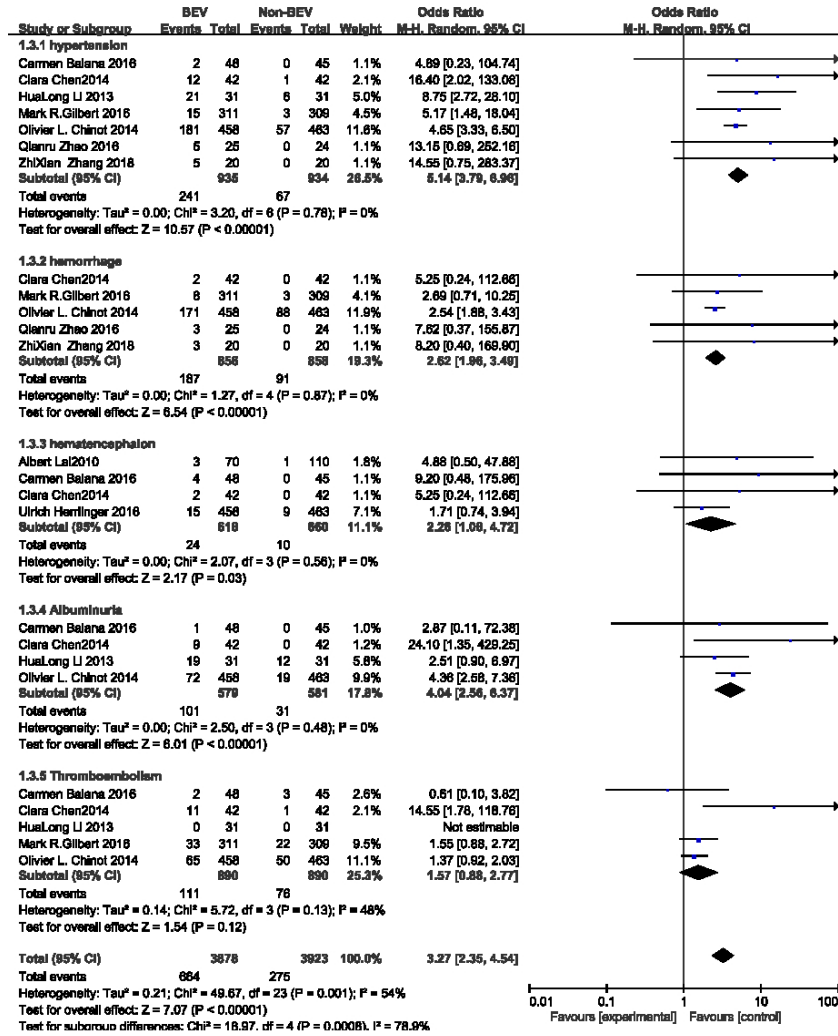

Figure 7: OR of adverse reactions in the treatment of glioma in the BEV group and Non-BEV group

209x278mm (120 x 120 DPI)

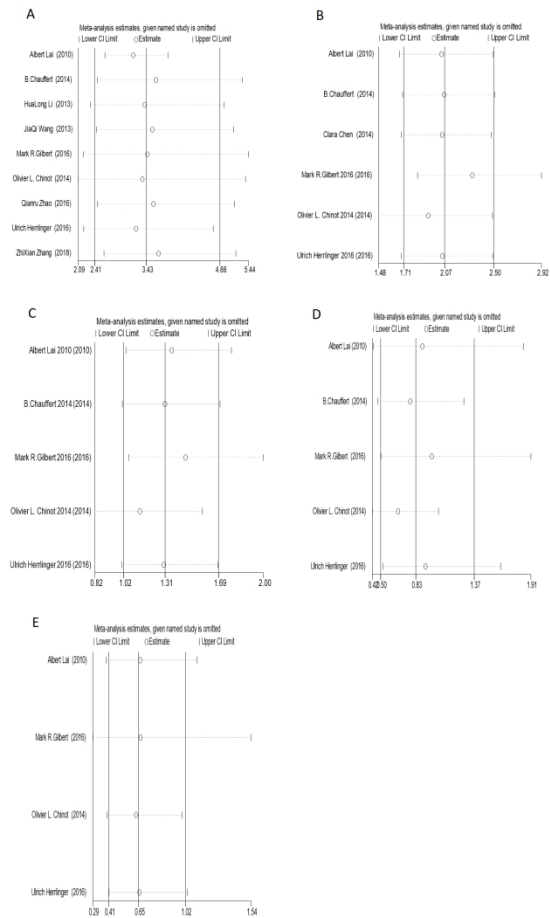

Figure 8:A: the sensitivity analysis of PFS6 ;B: the sensitivity analysis of PFS12; C:the sensitivity analysis of PFS18;D:the sensitivity analysis of PFS24;E:the sensitivity analysis of PFS30

209x296mm (288 x 288 DPI)

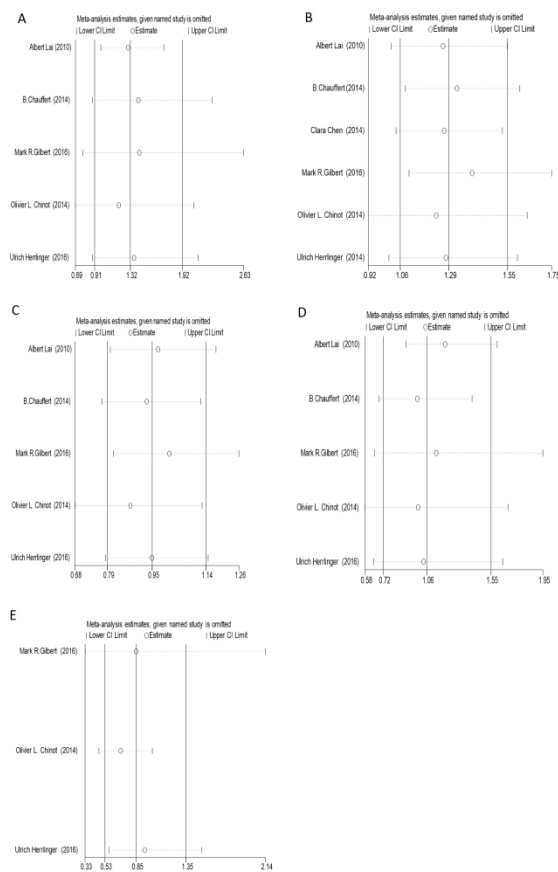

Figure 9:A: the sensitivity analysis of OS6 ;B: the sensitivity analysis of OS12; C:the sensitivity analysis of OS18;D:the sensitivity analysis of OS24;E:the sensitivity analysis of OS30

209x296mm (288 x 288 DPI)

1  
2  
3  
4  
5  
6  
7  
8  
9  
10  
11  
12  
13  
14  
15  
16  
17  
18  
19  
20  
21  
22  
23  
24  
25  
26  
27  
28  
29  
30  
31  
32  
33  
34  
35  
36  
37  
38  
39  
40  
41  
42  
43  
44  
45  
46  
47  
48  
49  
50  
51  
52  
53  
54  
55  
56  
57  
58  
59  
60

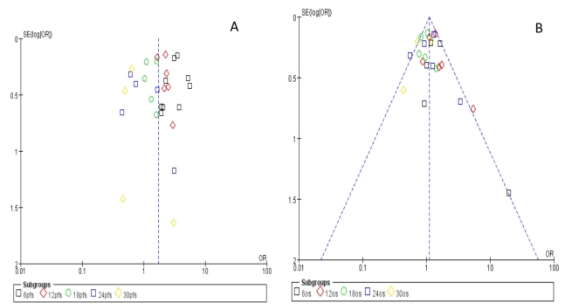

Figure 10:A: funnel chart of PFS at each follow-up time;B: funnel chart of OS at each follow-up time  
209x296mm (288 x 288 DPI)

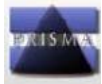

## PRISMA 2020 Checklist

| Section and Topic             | Item # | Checklist item                                                                                                                                                                                                                                                                                       | Location where item is reported |
|-------------------------------|--------|------------------------------------------------------------------------------------------------------------------------------------------------------------------------------------------------------------------------------------------------------------------------------------------------------|---------------------------------|
| <b>TITLE</b>                  |        |                                                                                                                                                                                                                                                                                                      |                                 |
| Title                         | 1      | Identify the report as a systematic review.                                                                                                                                                                                                                                                          | 1                               |
| <b>ABSTRACT</b>               |        |                                                                                                                                                                                                                                                                                                      |                                 |
| Abstract                      | 2      | See the PRISMA 2020 for Abstracts checklist.                                                                                                                                                                                                                                                         | 1                               |
| <b>INTRODUCTION</b>           |        |                                                                                                                                                                                                                                                                                                      |                                 |
| Rationale                     | 3      | Describe the rationale for the review in the context of existing knowledge.                                                                                                                                                                                                                          | 2                               |
| Objectives                    | 4      | Provide an explicit statement of the objective(s) or question(s) the review addresses.                                                                                                                                                                                                               | 2                               |
| <b>METHODS</b>                |        |                                                                                                                                                                                                                                                                                                      |                                 |
| Eligibility criteria          | 5      | Specify the inclusion and exclusion criteria for the review and how studies were grouped for the syntheses.                                                                                                                                                                                          | 3                               |
| Information sources           | 6      | Specify all databases, registers, websites, organisations, reference lists and other sources searched or consulted to identify studies. Specify the date when each source was last searched or consulted.                                                                                            | 3                               |
| Search strategy               | 7      | Present the full search strategies for all databases, registers and websites, including any filters and limits used.                                                                                                                                                                                 | 13-14                           |
| Selection process             | 8      | Specify the methods used to decide whether a study met the inclusion criteria of the review, including how many reviewers screened each record and each report retrieved, whether they worked independently, and if applicable, details of automation tools used in the process.                     | 3                               |
| Data collection process       | 9      | Specify the methods used to collect data from reports, including how many reviewers collected data from each report, whether they worked independently, any processes for obtaining or confirming data from study investigators, and if applicable, details of automation tools used in the process. | 4                               |
| Data items                    | 10a    | List and define all outcomes for which data were sought. Specify whether all results that were compatible with each outcome domain in each study were sought (e.g. for all measures, time points, analyses), and if not, the methods used to decide which results to collect.                        | 4                               |
|                               | 10b    | List and define all other variables for which data were sought (e.g. participant and intervention characteristics, funding sources). Describe any assumptions made about any missing or unclear information.                                                                                         | 9                               |
| Study risk of bias assessment | 11     | Specify the methods used to assess risk of bias in the included studies, including details of the tool(s) used, how many reviewers assessed each study and whether they worked independently, and if applicable, details of automation tools used in the process.                                    | 4                               |
| Effect measures               | 12     | Specify for each outcome the effect measure(s) (e.g. risk ratio, mean difference) used in the synthesis or presentation of results.                                                                                                                                                                  | 4                               |
| Synthesis methods             | 13a    | Describe the processes used to decide which studies were eligible for each synthesis (e.g. tabulating the study intervention characteristics and comparing against the planned groups for each synthesis (item #5)).                                                                                 | 3                               |
|                               | 13b    | Describe any methods required to prepare the data for presentation or synthesis, such as handling of missing summary statistics, or data conversions.                                                                                                                                                | 4                               |
|                               | 13c    | Describe any methods used to tabulate or visually display results of individual studies and syntheses.                                                                                                                                                                                               | 4                               |
|                               | 13d    | Describe any methods used to synthesize results and provide a rationale for the choice(s). If meta-analysis was performed, describe the model(s), method(s) to identify the presence and extent of statistical heterogeneity, and software package(s) used.                                          | 4                               |
|                               | 13e    | Describe any methods used to explore possible causes of heterogeneity among study results (e.g. subgroup analysis, meta-regression).                                                                                                                                                                 | 4-5                             |
|                               | 13f    | Describe any sensitivity analyses conducted to assess robustness of the synthesized results.                                                                                                                                                                                                         | 4-5                             |
| Reporting bias assessment     | 14     | Describe any methods used to assess risk of bias due to missing results in a synthesis (arising from reporting biases).                                                                                                                                                                              | 4                               |
| Certainty assessment          | 15     | Describe any methods used to assess certainty (or confidence) in the body of evidence for an outcome.                                                                                                                                                                                                | 4-5                             |

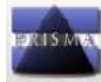

## PRISMA 2020 Checklist

| Section and Topic                              | Item # | Checklist item                                                                                                                                                                                                                                                                       | Location where item is reported |
|------------------------------------------------|--------|--------------------------------------------------------------------------------------------------------------------------------------------------------------------------------------------------------------------------------------------------------------------------------------|---------------------------------|
| <b>RESULTS</b>                                 |        |                                                                                                                                                                                                                                                                                      |                                 |
| Study selection                                | 16a    | Describe the results of the search and selection process, from the number of records identified in the search to the number of studies included in the review, ideally using a flow diagram.                                                                                         | 5                               |
|                                                | 16b    | Cite studies that might appear to meet the inclusion criteria, but which were excluded, and explain why they were excluded.                                                                                                                                                          | 5                               |
| Study characteristics                          | 17     | Cite each included study and present its characteristics.                                                                                                                                                                                                                            | 5                               |
| Risk of bias in studies                        | 18     | Present assessments of risk of bias for each included study.                                                                                                                                                                                                                         | 5                               |
| Results of individual studies                  | 19     | For all outcomes, present, for each study: (a) summary statistics for each group (where appropriate) and (b) an effect estimate and its precision (e.g. confidence/credible interval), ideally using structured tables or plots.                                                     | 5-6                             |
| Results of syntheses                           | 20a    | For each synthesis, briefly summarise the characteristics and risk of bias among contributing studies.                                                                                                                                                                               | 6                               |
|                                                | 20b    | Present results of all statistical syntheses conducted. If meta-analysis was done, present for each the summary estimate and its precision (e.g. confidence/credible interval) and measures of statistical heterogeneity. If comparing groups, describe the direction of the effect. | 6                               |
|                                                | 20c    | Present results of all investigations of possible causes of heterogeneity among study results.                                                                                                                                                                                       | 6                               |
|                                                | 20d    | Present results of all sensitivity analyses conducted to assess the robustness of the synthesized results.                                                                                                                                                                           | 6                               |
| Reporting biases                               | 21     | Present assessments of risk of bias due to missing results (arising from reporting biases) for each synthesis assessed.                                                                                                                                                              | 6                               |
| Certainty of evidence                          | 22     | Present assessments of certainty (or confidence) in the body of evidence for each outcome assessed.                                                                                                                                                                                  | 6                               |
| <b>DISCUSSION</b>                              |        |                                                                                                                                                                                                                                                                                      |                                 |
| Discussion                                     | 23a    | Provide a general interpretation of the results in the context of other evidence.                                                                                                                                                                                                    | 7-8                             |
|                                                | 23b    | Discuss any limitations of the evidence included in the review.                                                                                                                                                                                                                      | 7-8                             |
|                                                | 23c    | Discuss any limitations of the review processes used.                                                                                                                                                                                                                                | 7-8                             |
|                                                | 23d    | Discuss implications of the results for practice, policy, and future research.                                                                                                                                                                                                       | 8                               |
| <b>OTHER INFORMATION</b>                       |        |                                                                                                                                                                                                                                                                                      |                                 |
| Registration and protocol                      | 24a    | Provide registration information for the review, including register name and registration number, or state that the review was not registered.                                                                                                                                       | 9                               |
|                                                | 24b    | Indicate where the review protocol can be accessed, or state that a protocol was not prepared.                                                                                                                                                                                       | 9                               |
|                                                | 24c    | Describe and explain any amendments to information provided at registration or in the protocol.                                                                                                                                                                                      | 9                               |
| Support                                        | 25     | Describe sources of financial or non-financial support for the review, and the role of the funders or sponsors in the review.                                                                                                                                                        | 9                               |
| Competing interests                            | 26     | Declare any competing interests of review authors.                                                                                                                                                                                                                                   | 9                               |
| Availability of data, code and other materials | 27     | Report which of the following are publicly available and where they can be found: template data collection forms; data extracted from included studies; data used for all analyses; analytic code; any other materials used in the review.                                           | 9                               |
